# Supplementary material
Source: PubMed Central journal article supplement (PMC3021624)

*Supporting Information*

**Pd-Catalyzed Cross-Couplings of  $\alpha$ -(Acyloxy)-tri-*n*-butylstannanes with  
Alkenyl, Aryl and Heteroaryl Electrophiles**

Mohan Goli, Anyu He and J. R. Falck\*

*Departments of Biochemistry and Pharmacology, University of Texas Southwestern  
Medical Center, Dallas, Texas 75390 USA*

*E-mail: [j.falck@UTSouthwestern.edu](mailto:j.falck@UTSouthwestern.edu)*

I.  $^1\text{H}$  and  $^{13}\text{C}$  NMR spectra

S-2

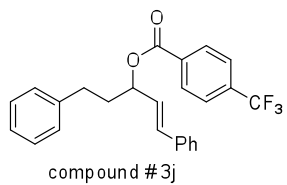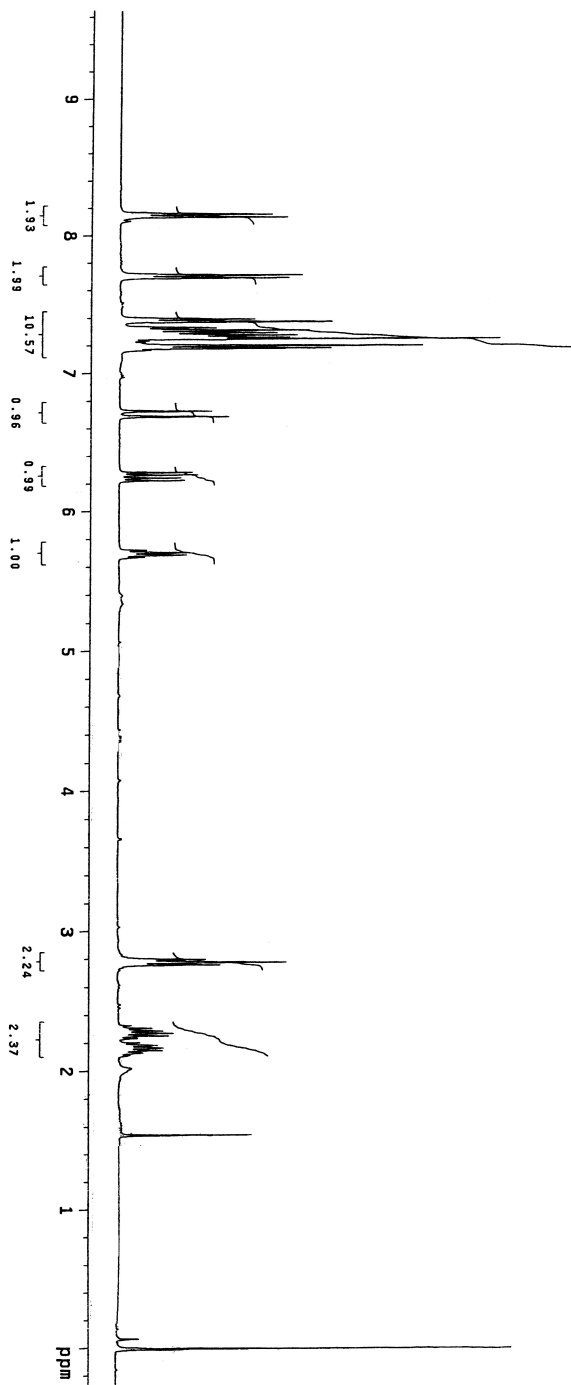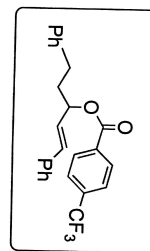

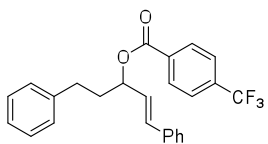

compound #3j

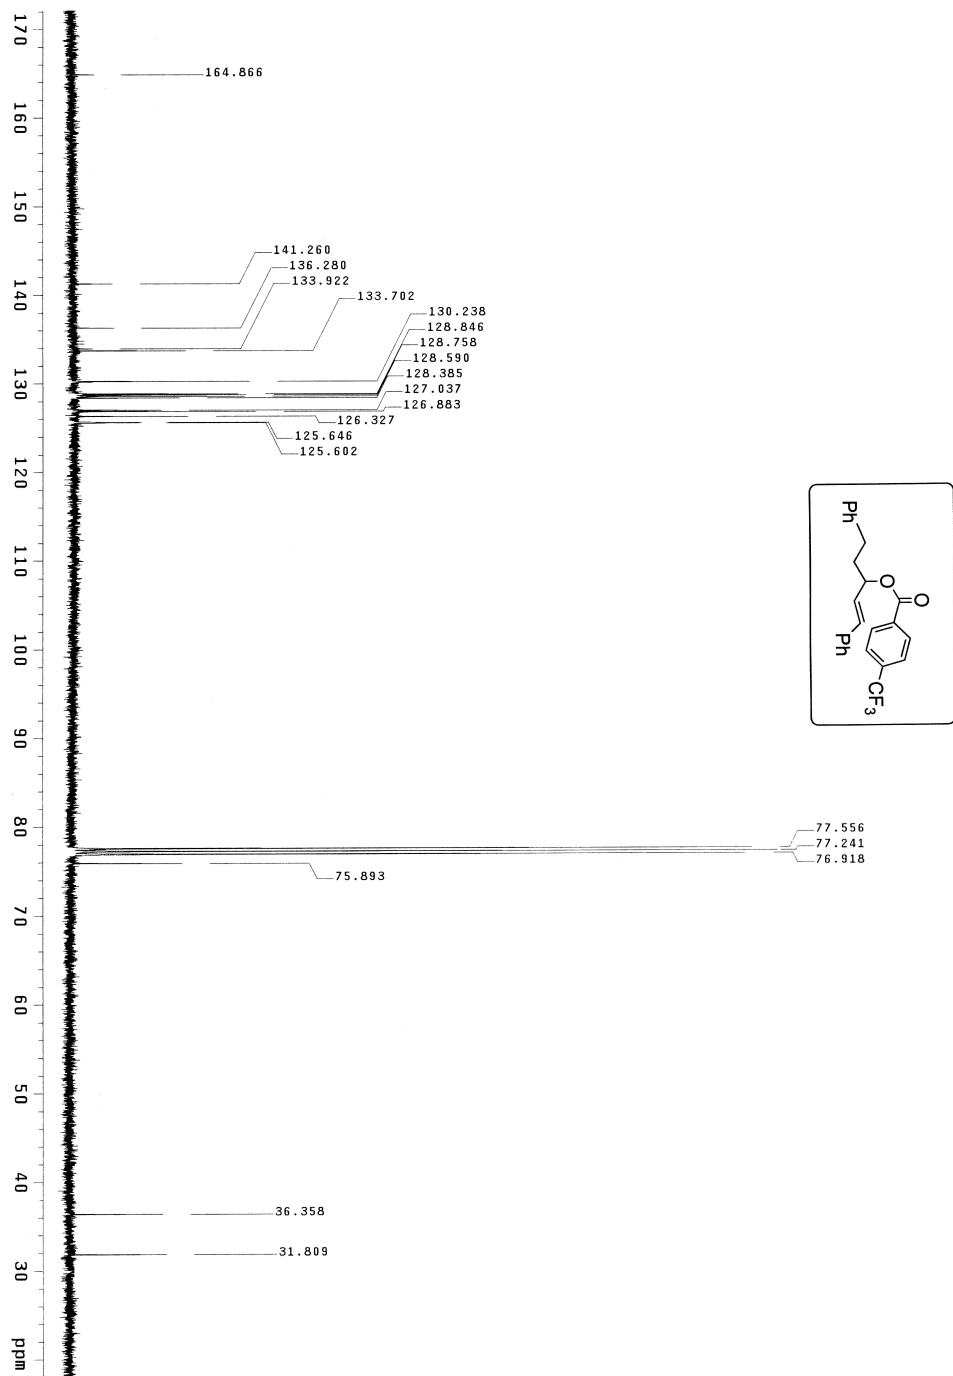

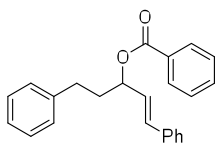

compound #3b

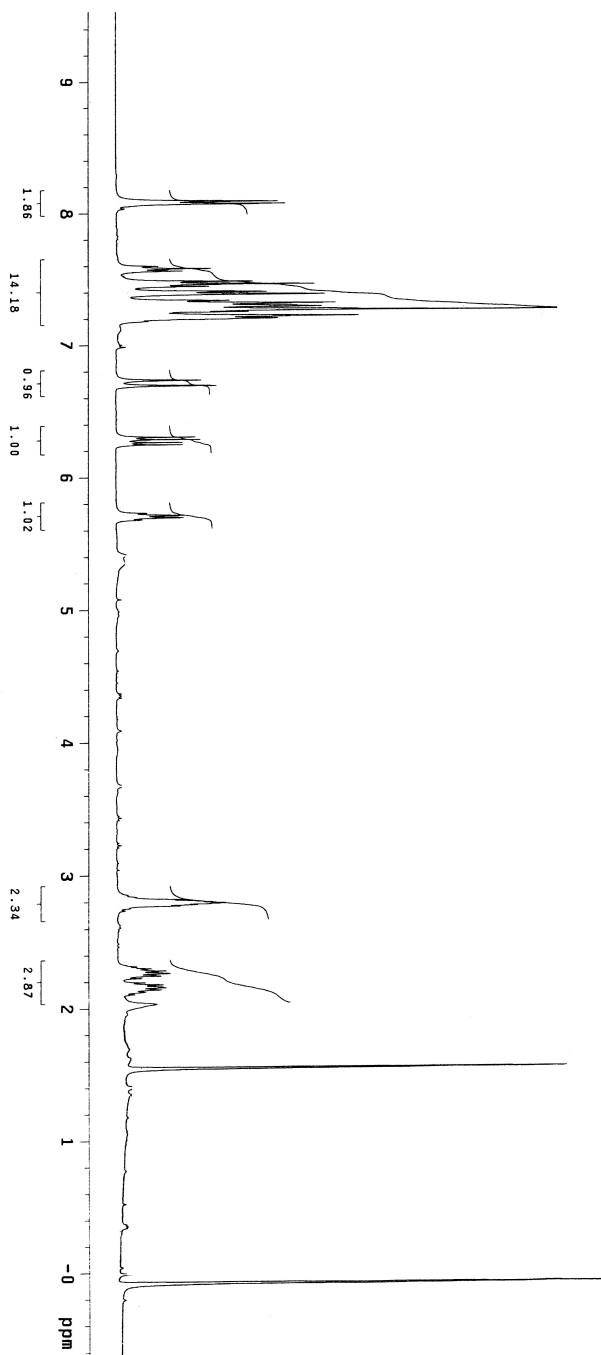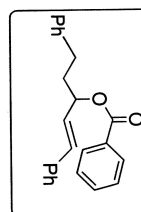

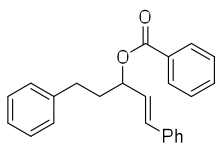

compound #3b

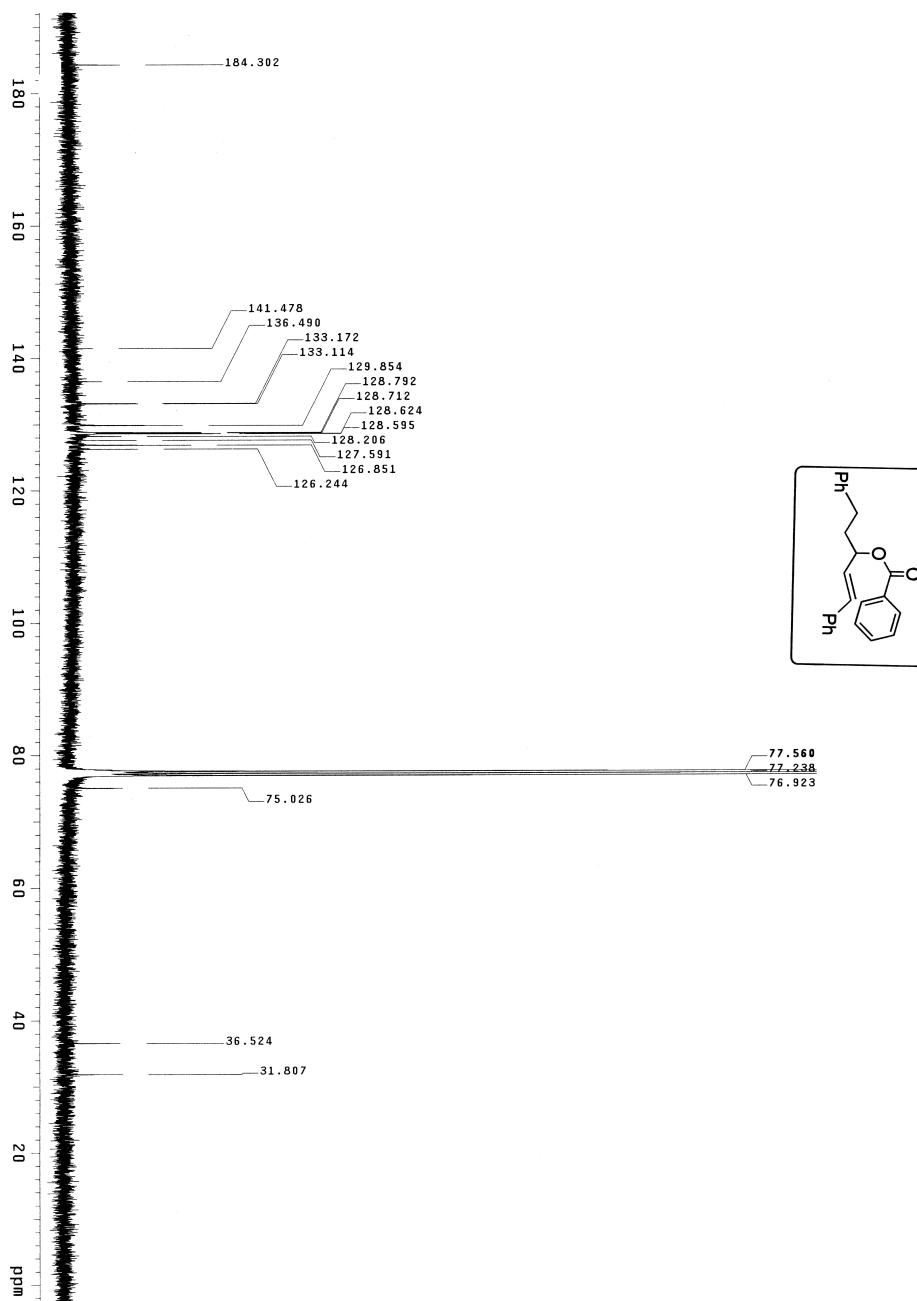

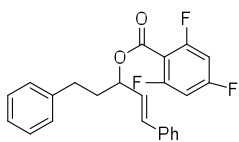

compound #3h

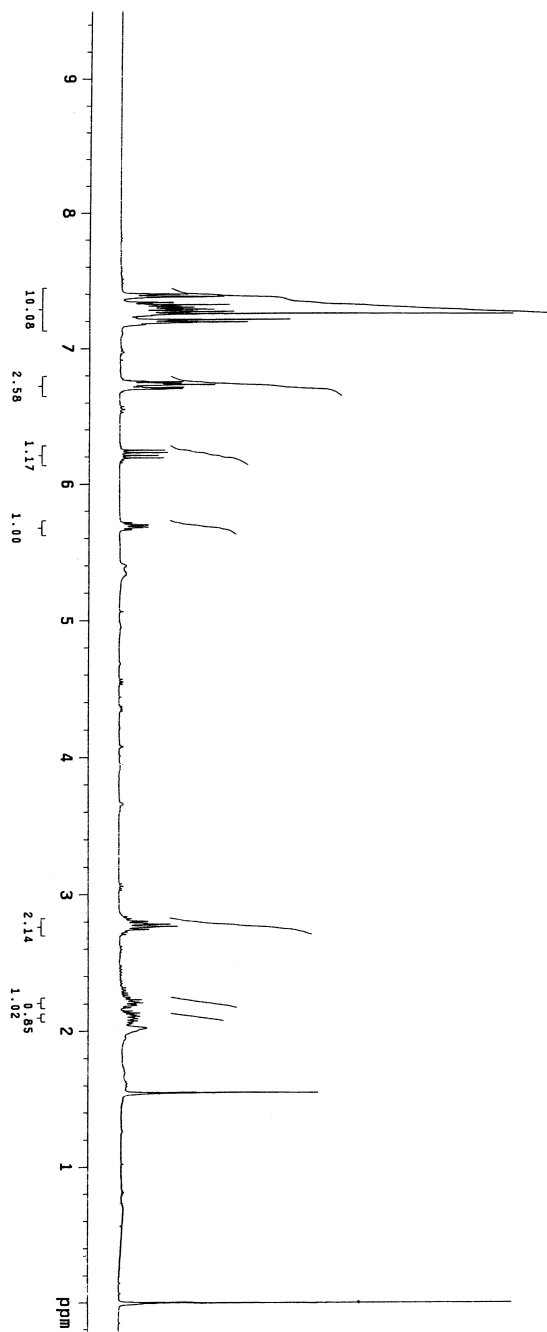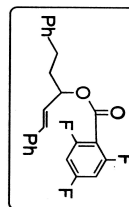

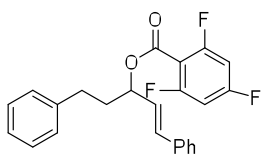

compound #3h

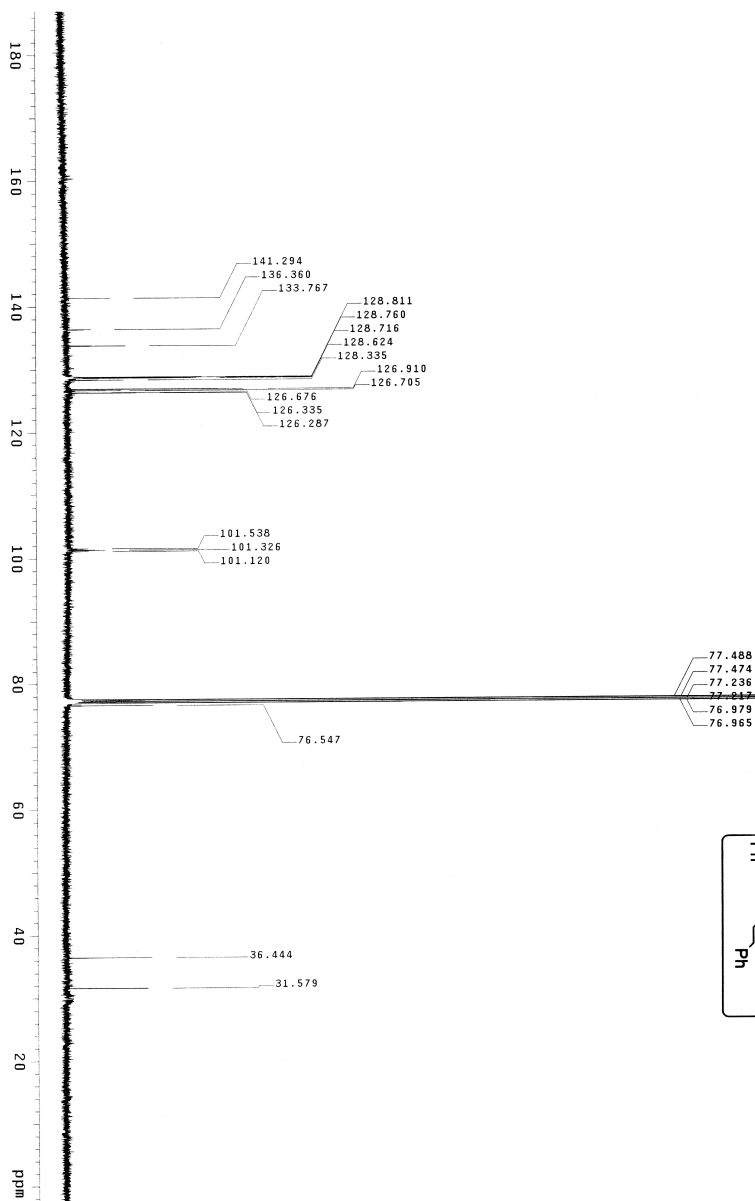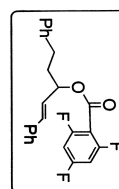

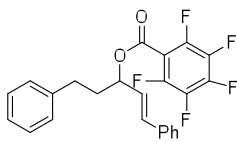

compound #3i

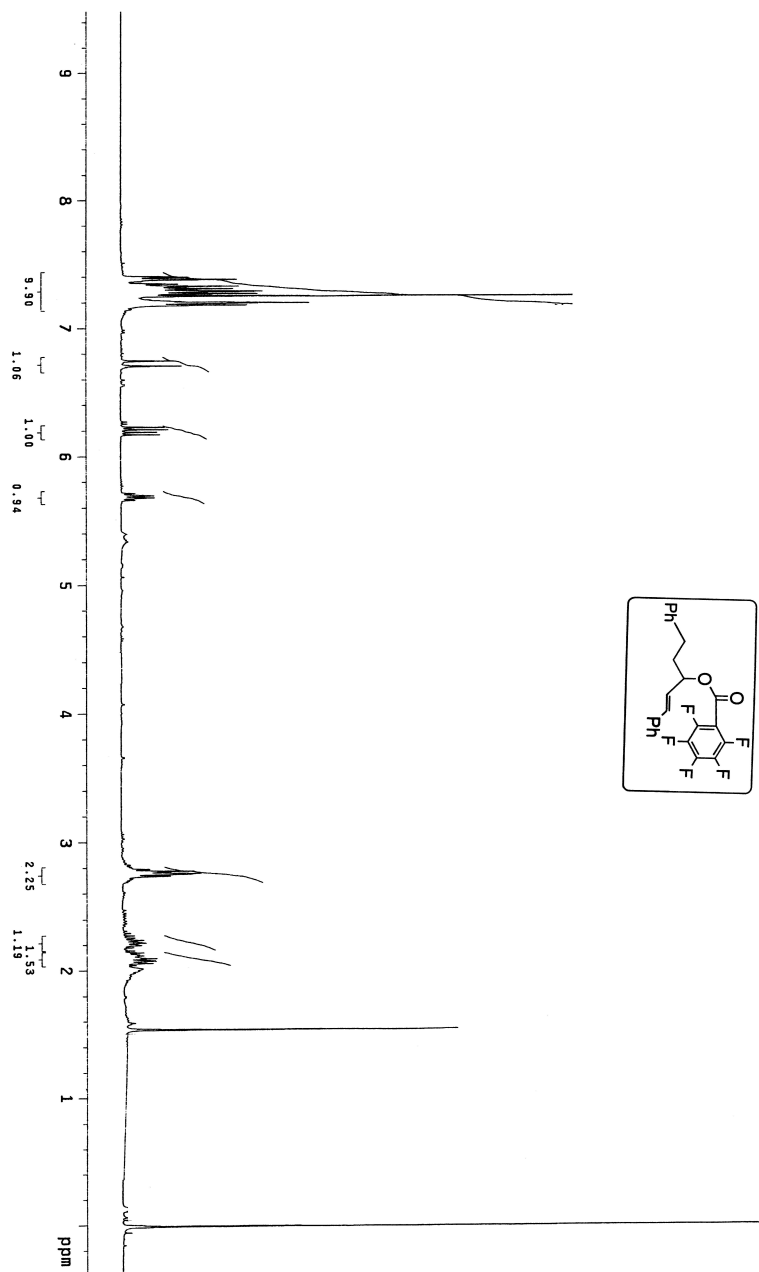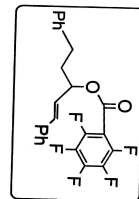



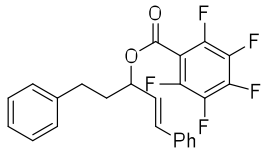

compound #3i

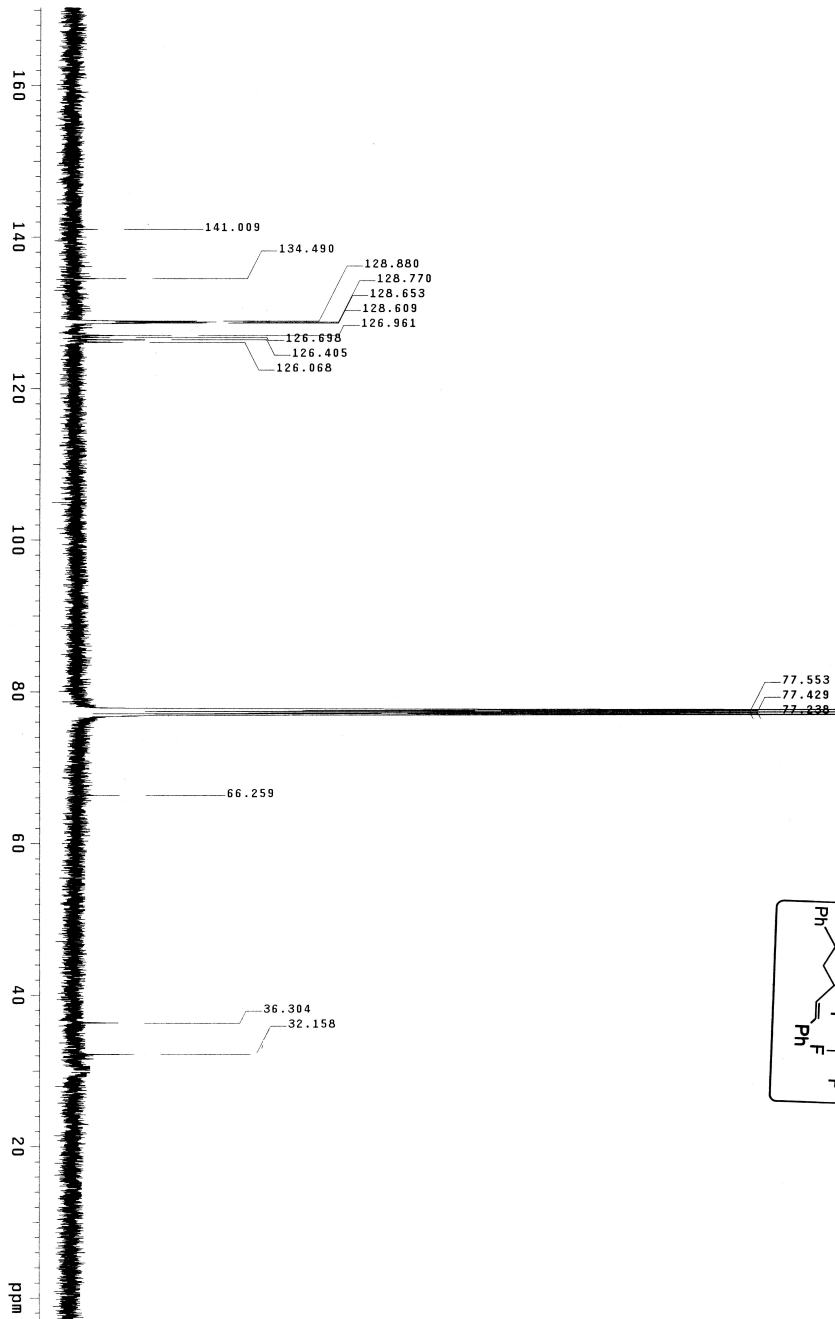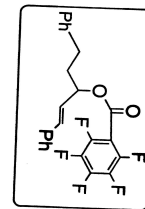

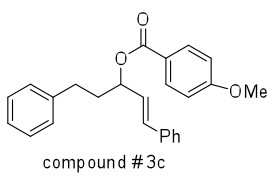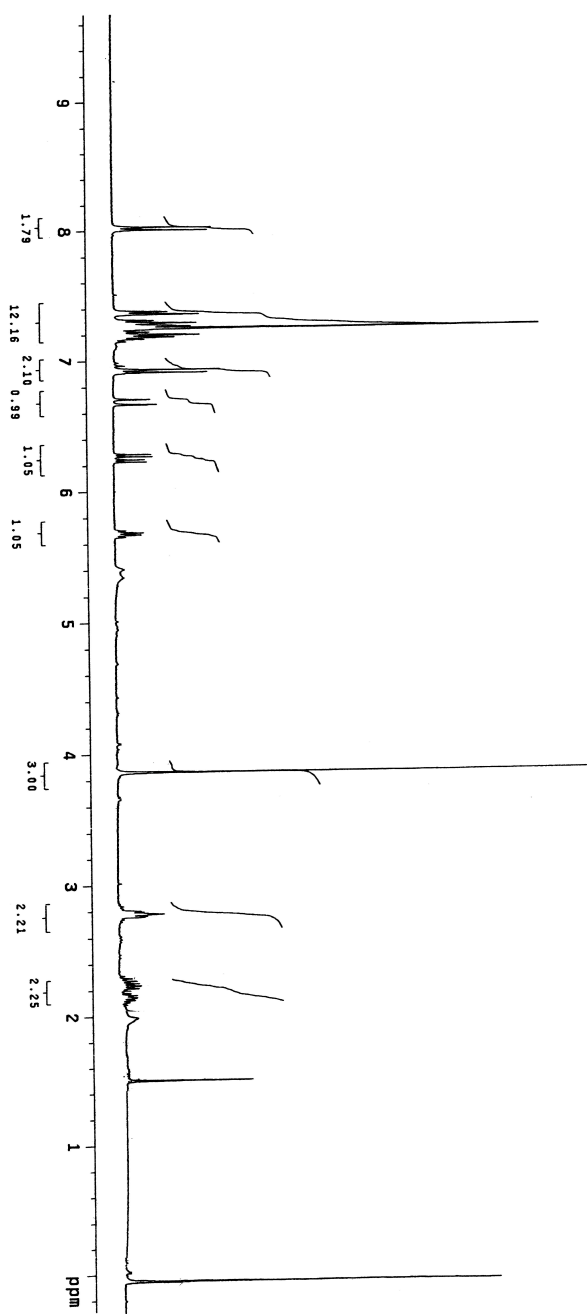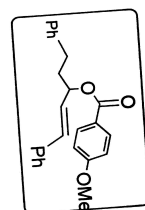

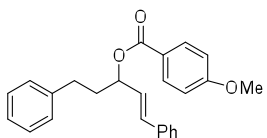

compound #3c

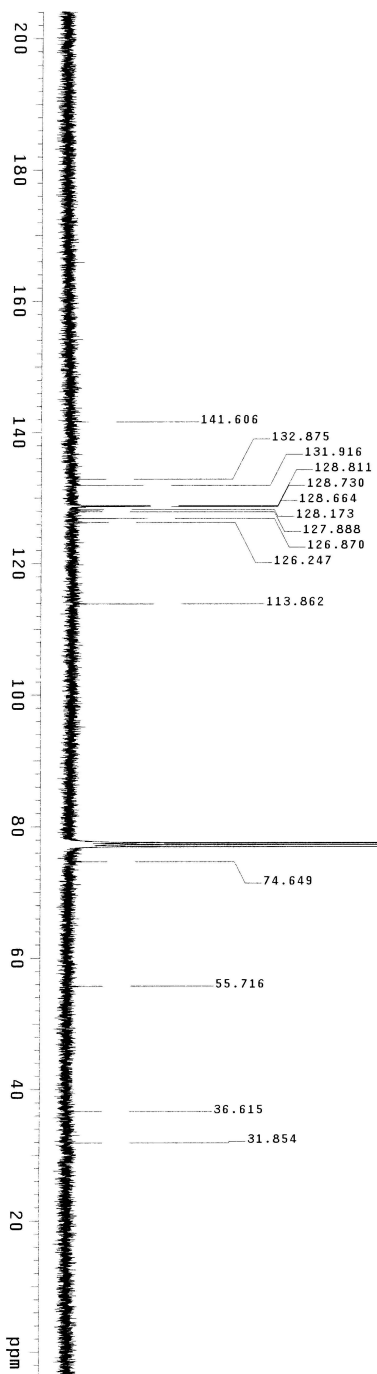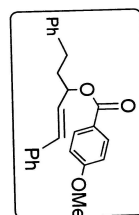

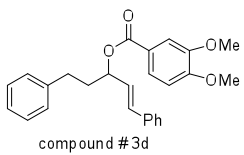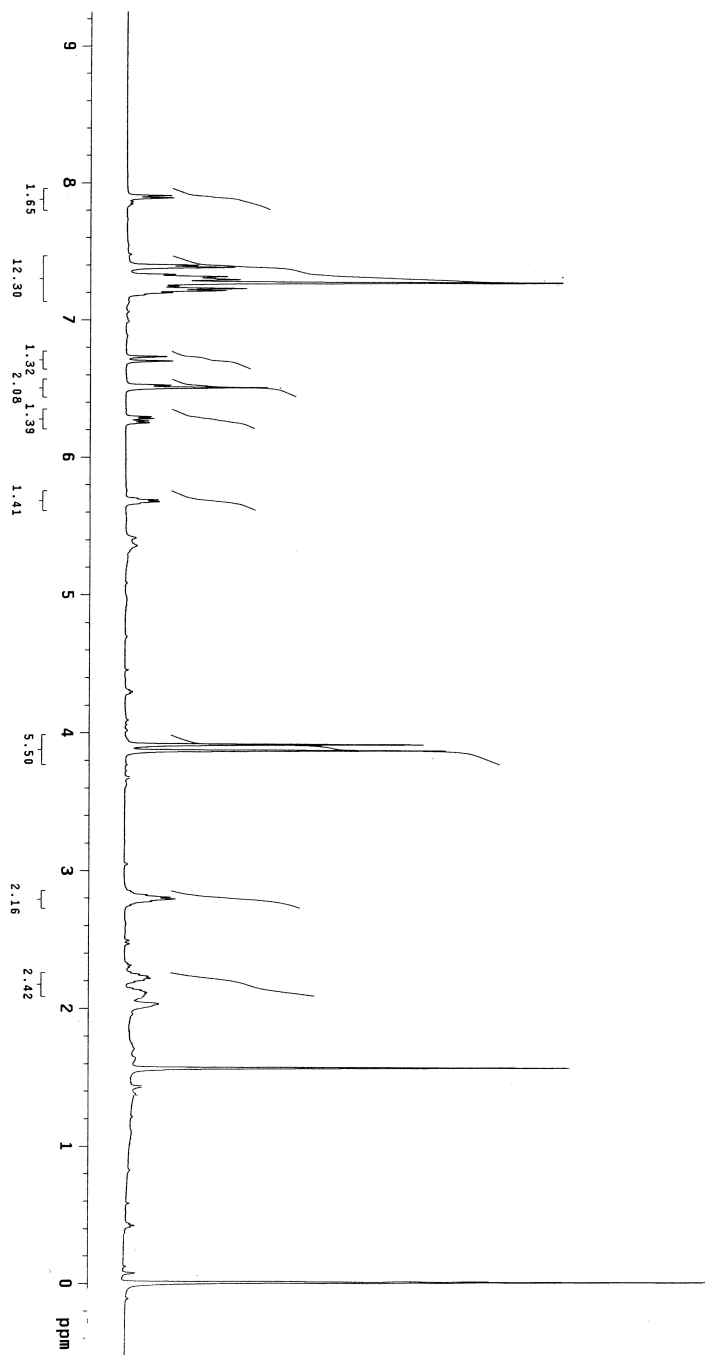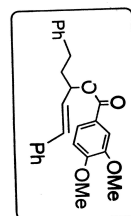

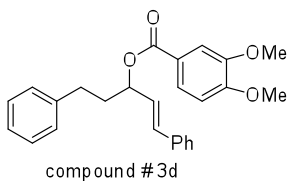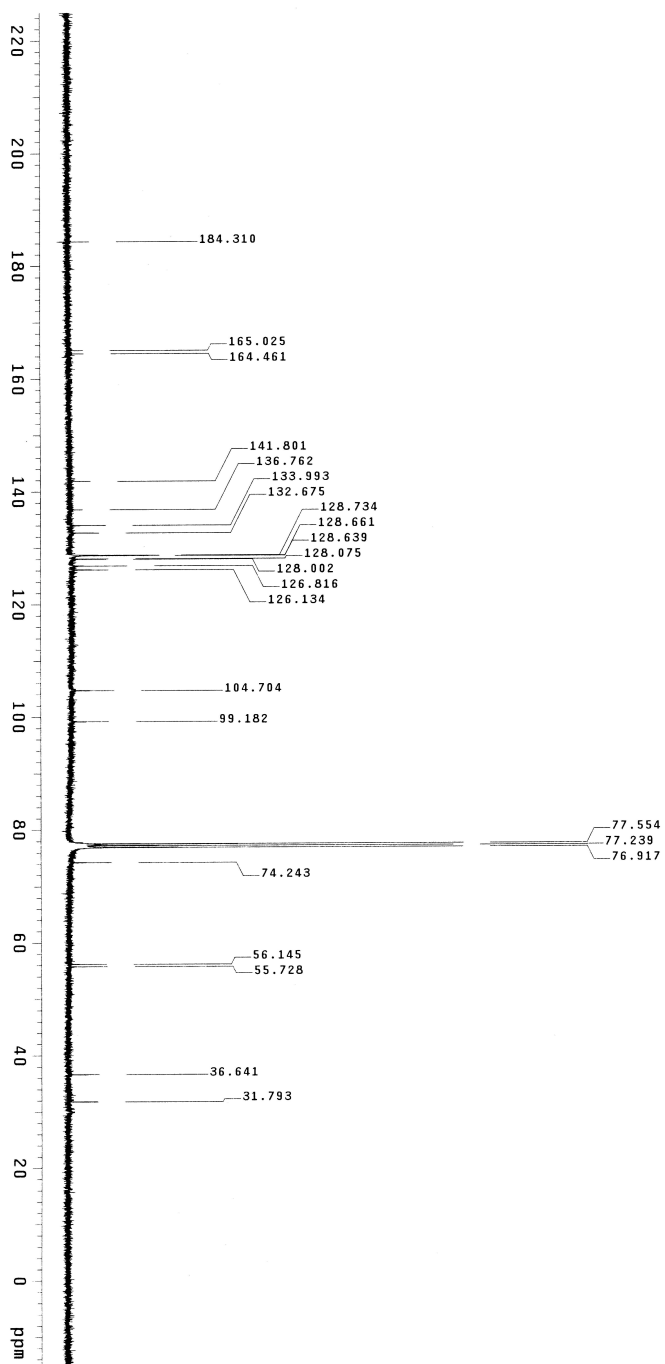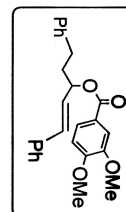

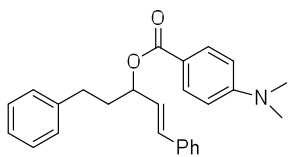

compound #3e

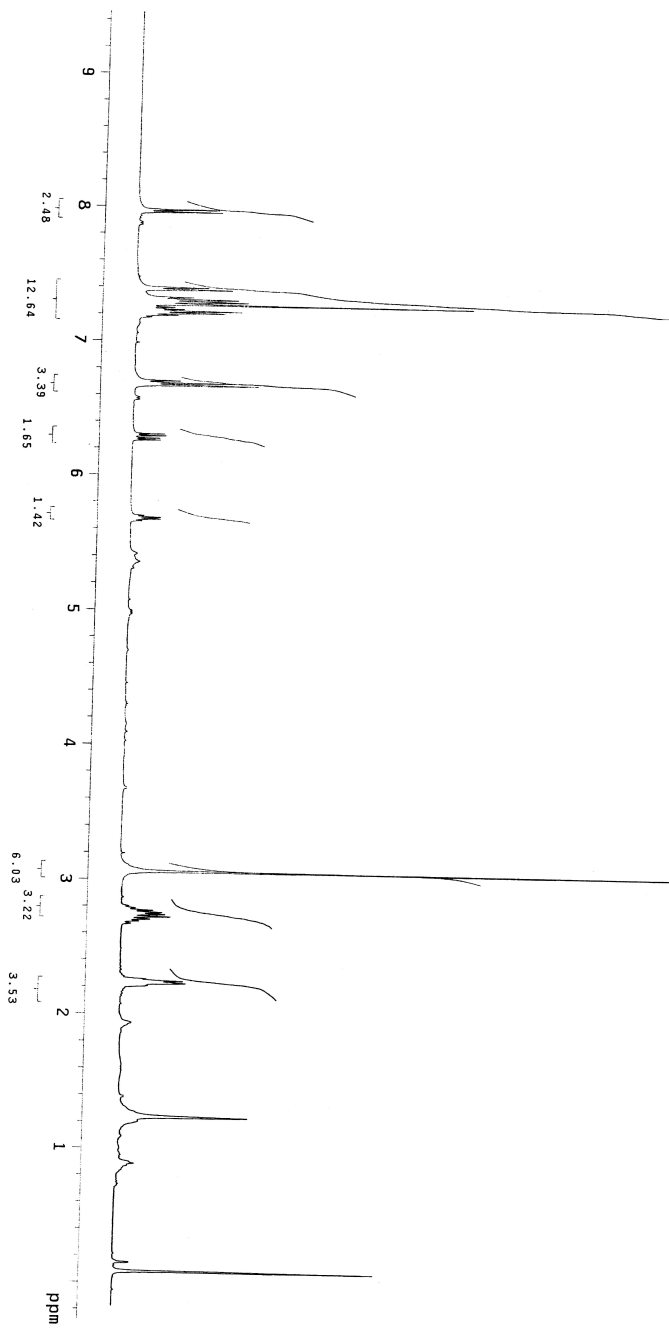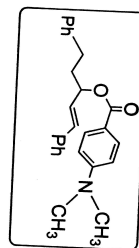

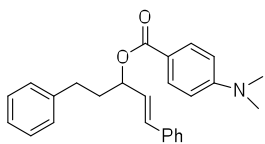

compound #3e

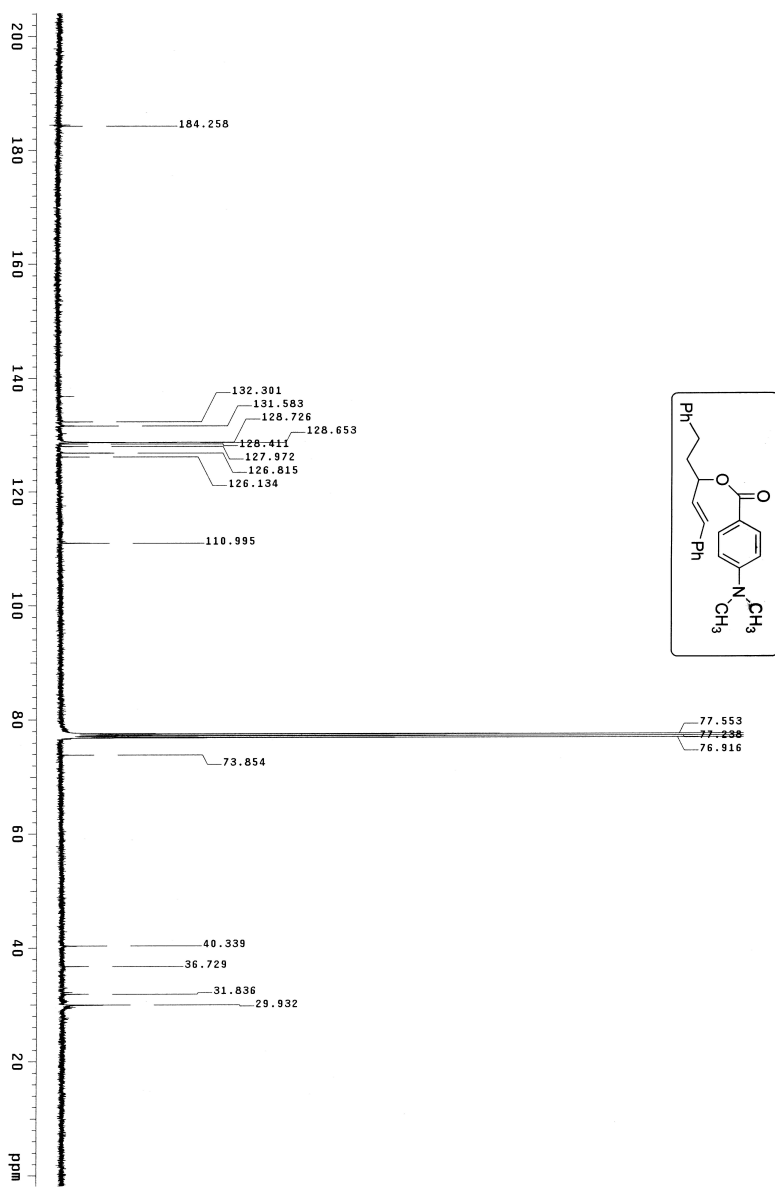

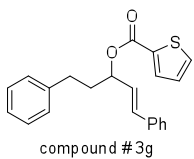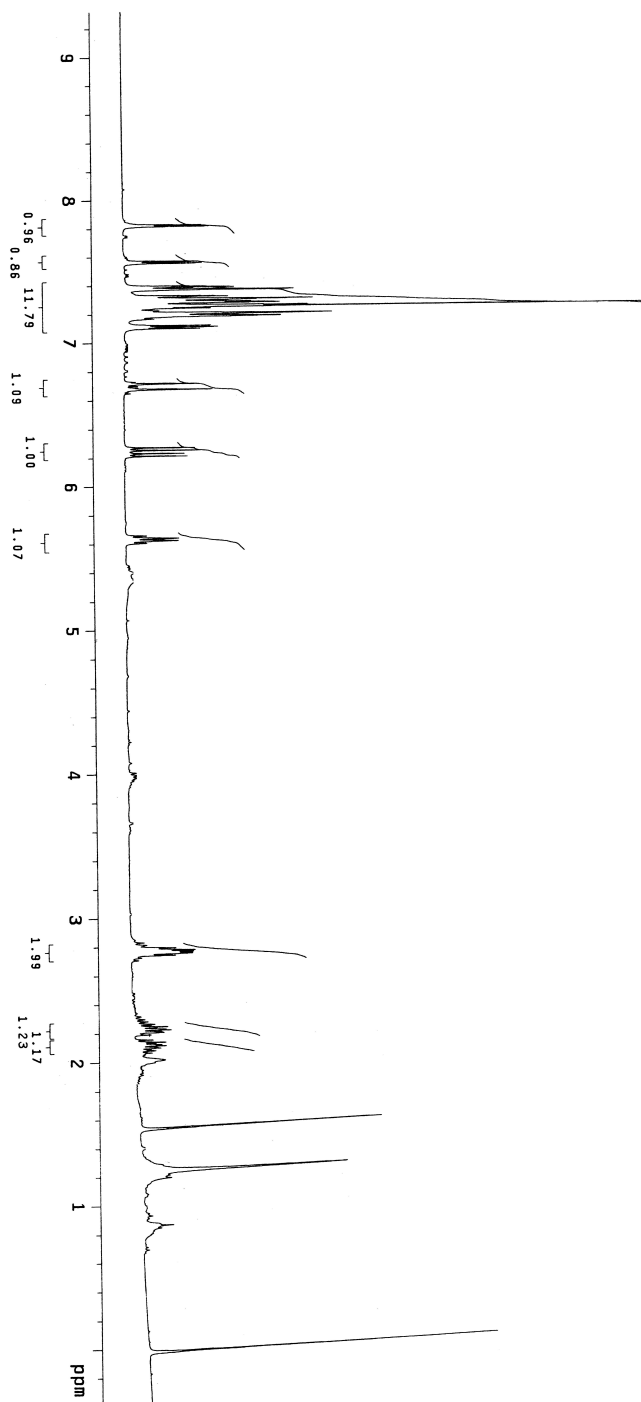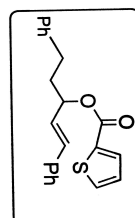



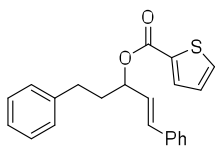

compound #3g

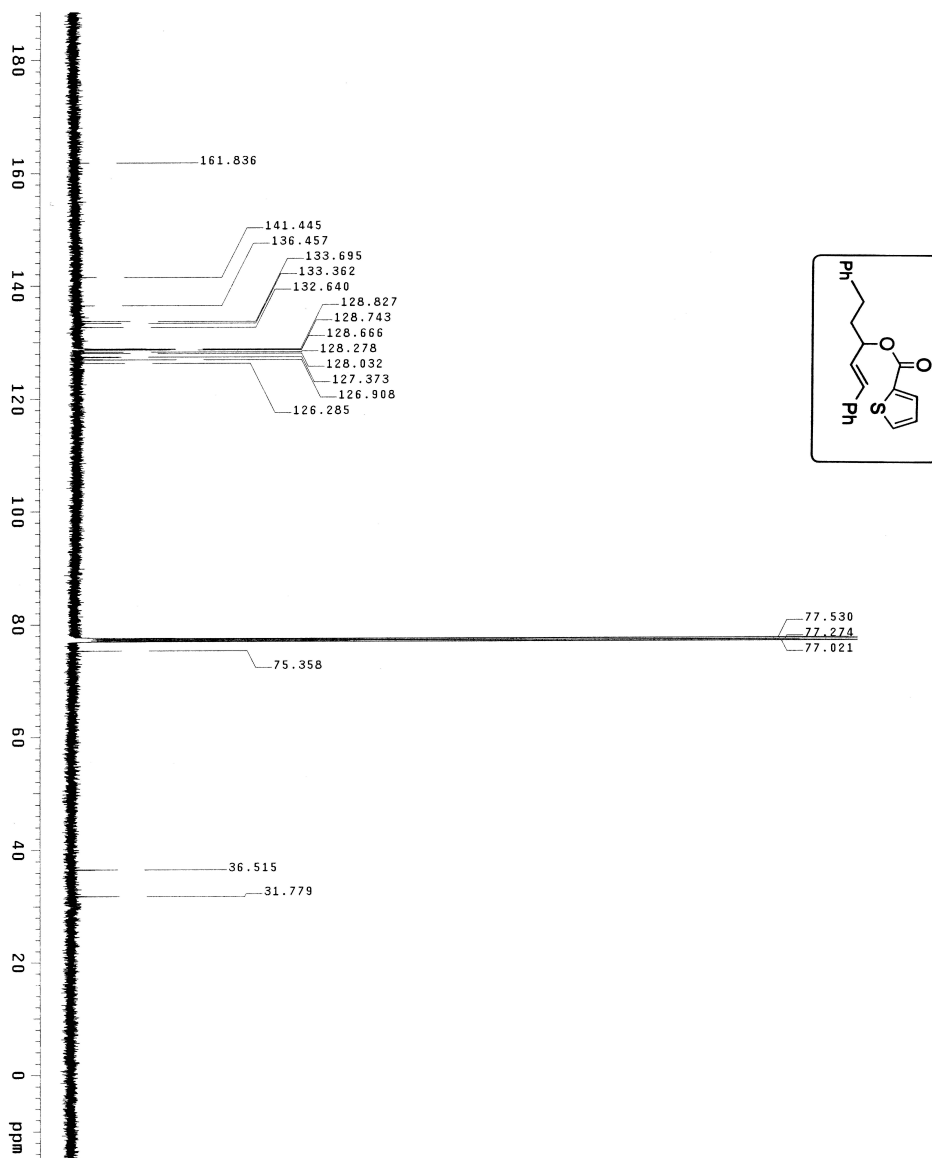

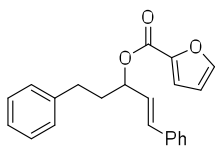

compound #3f

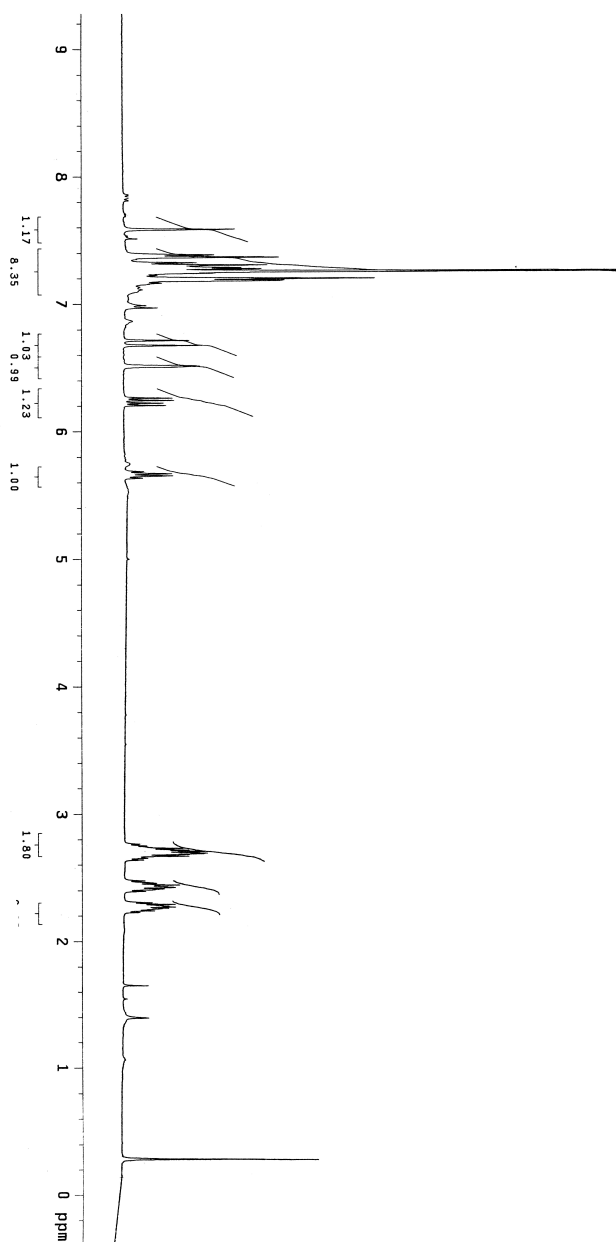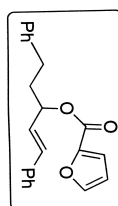

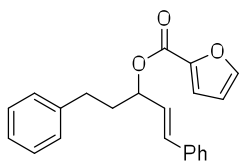

compound # 3f

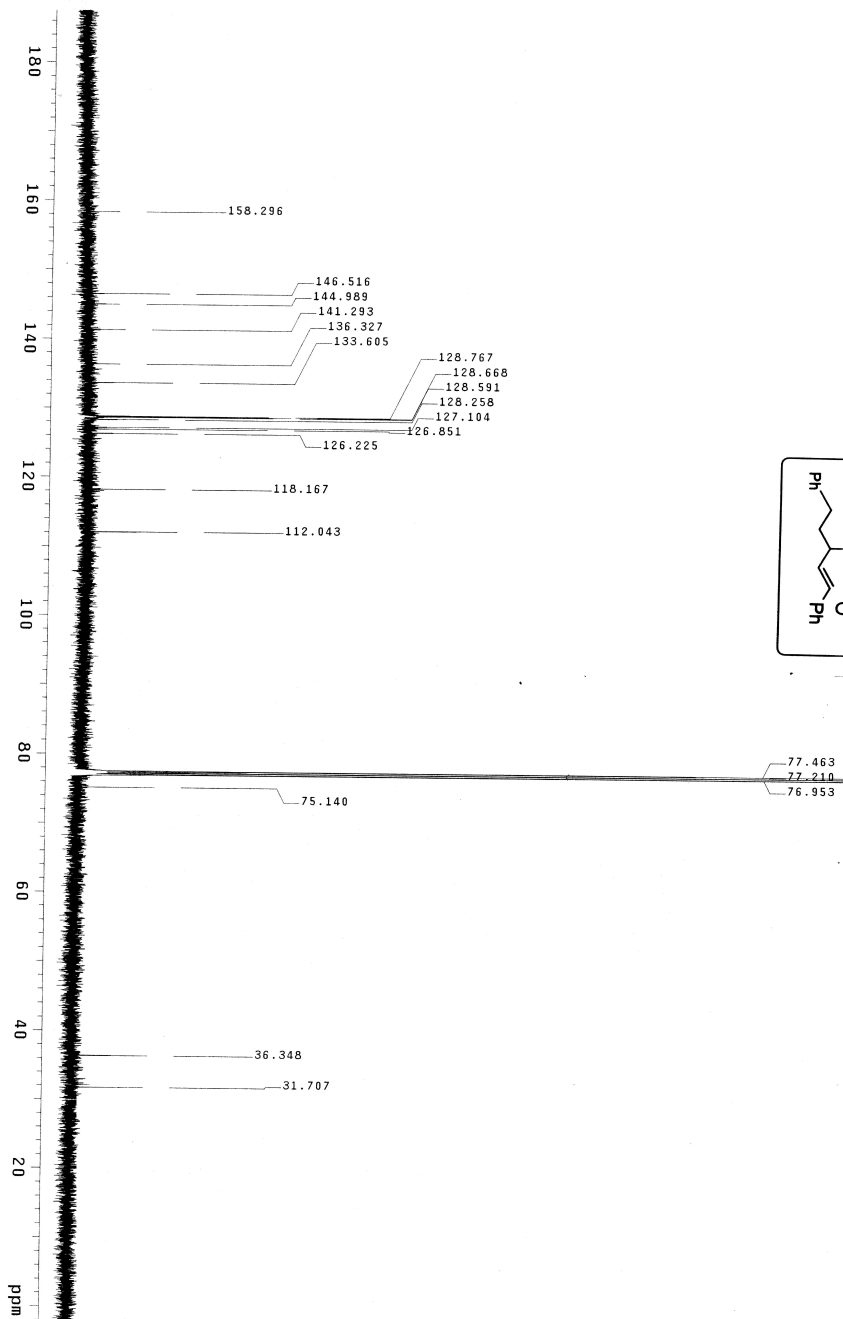

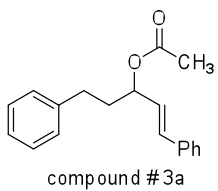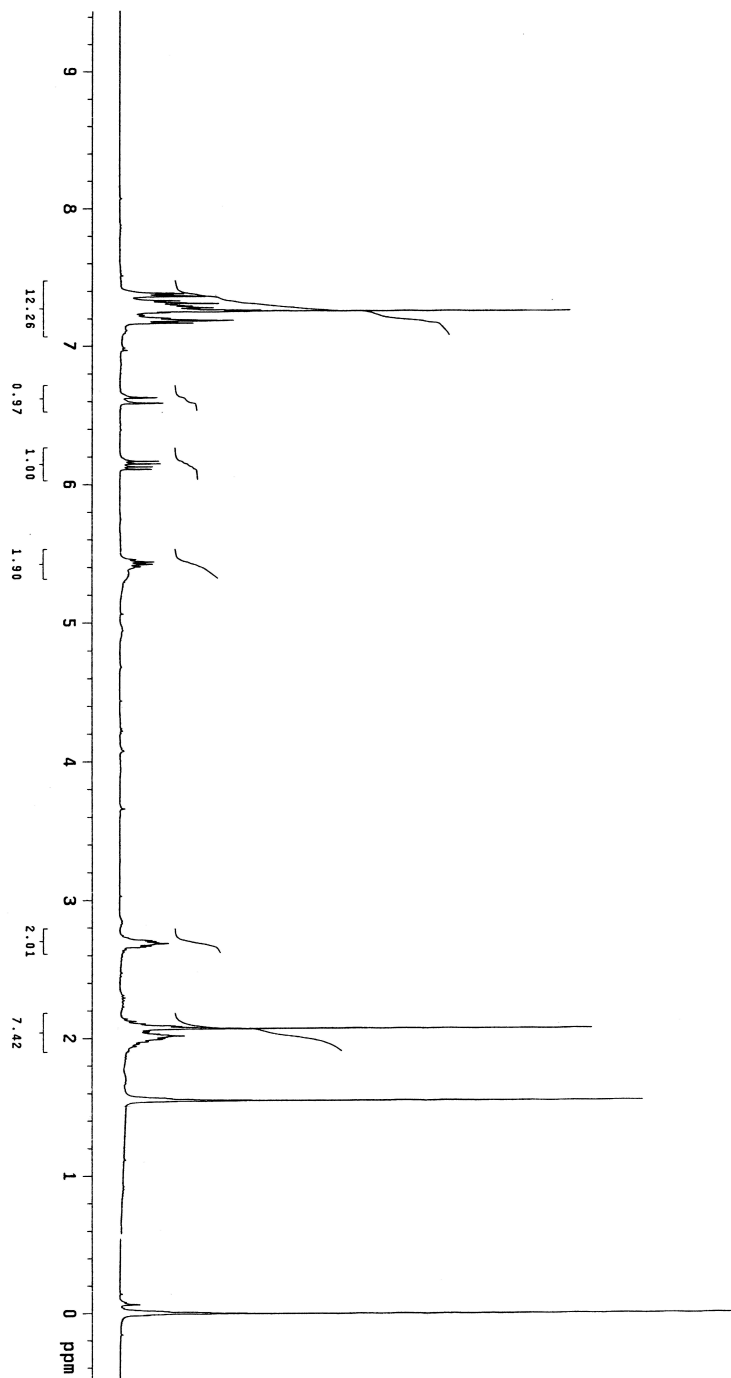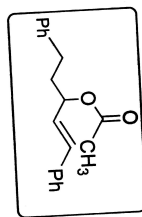

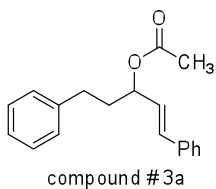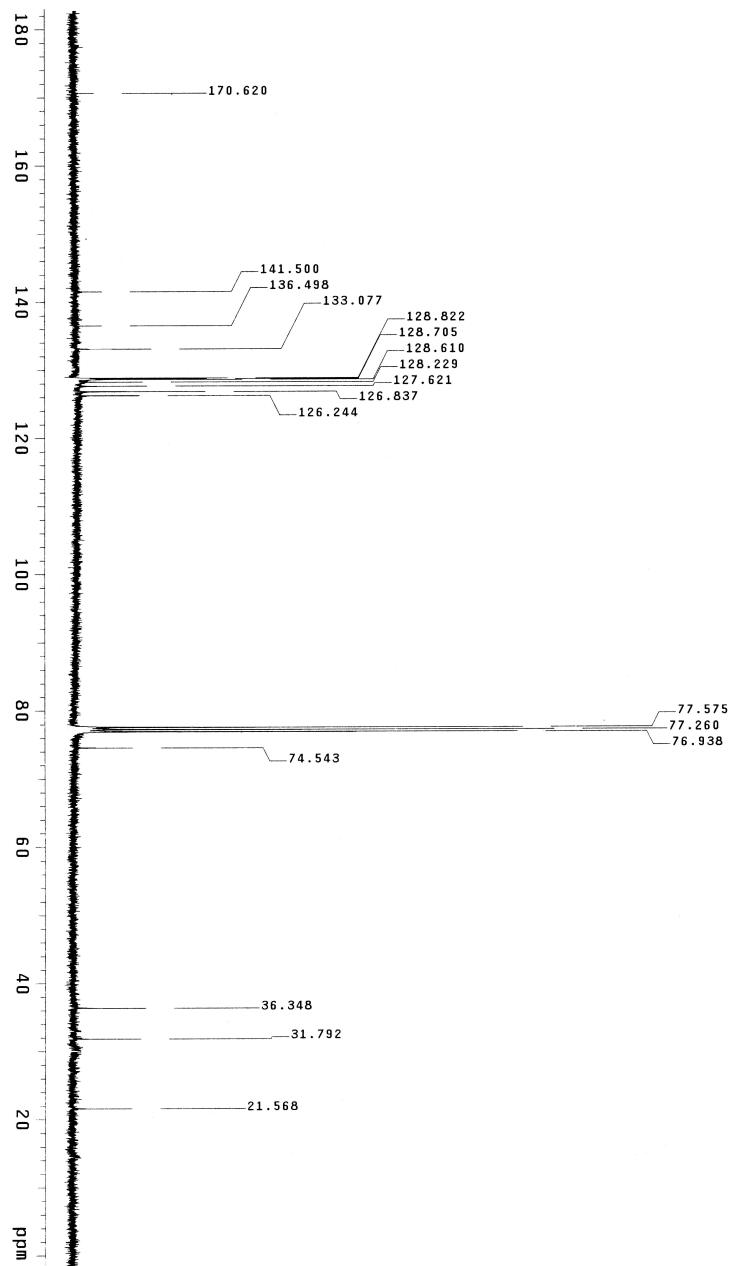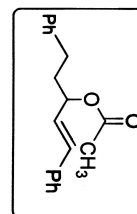

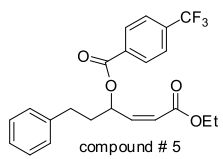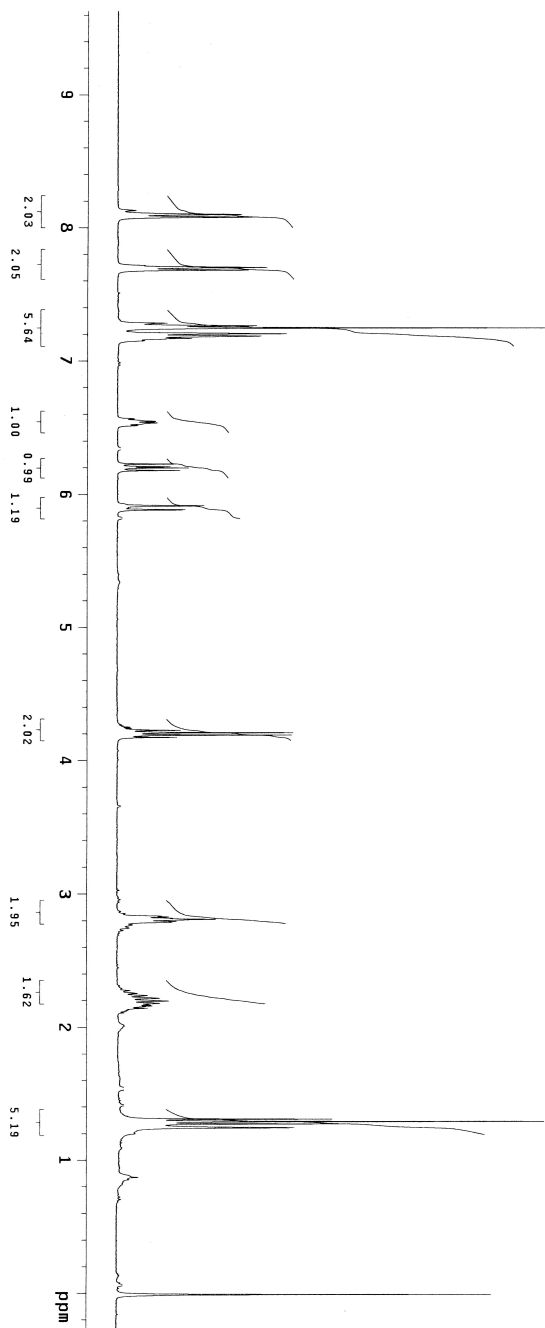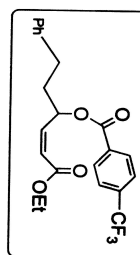

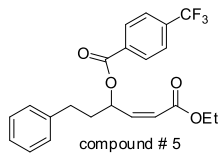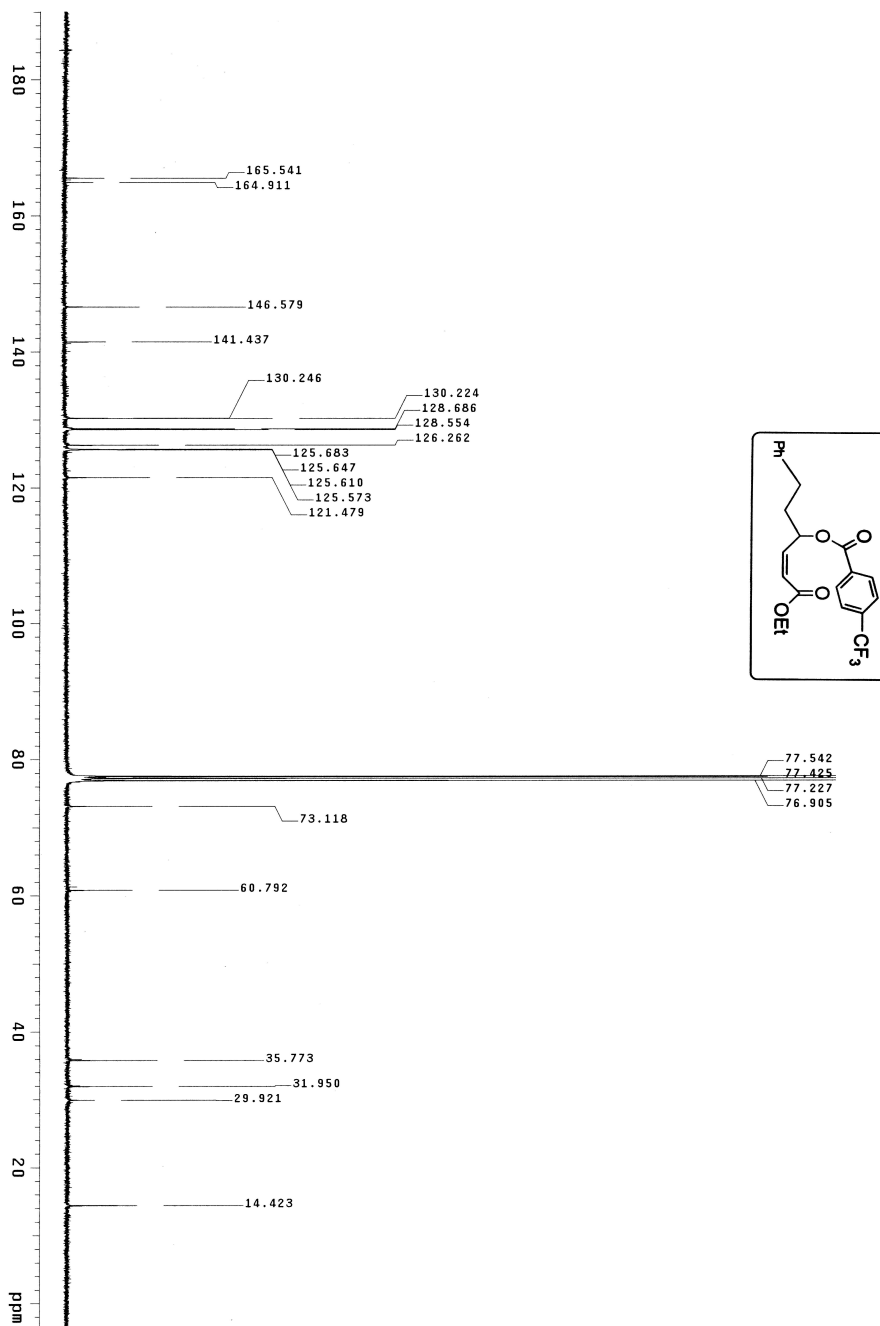

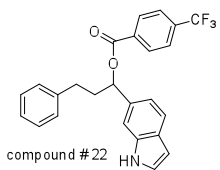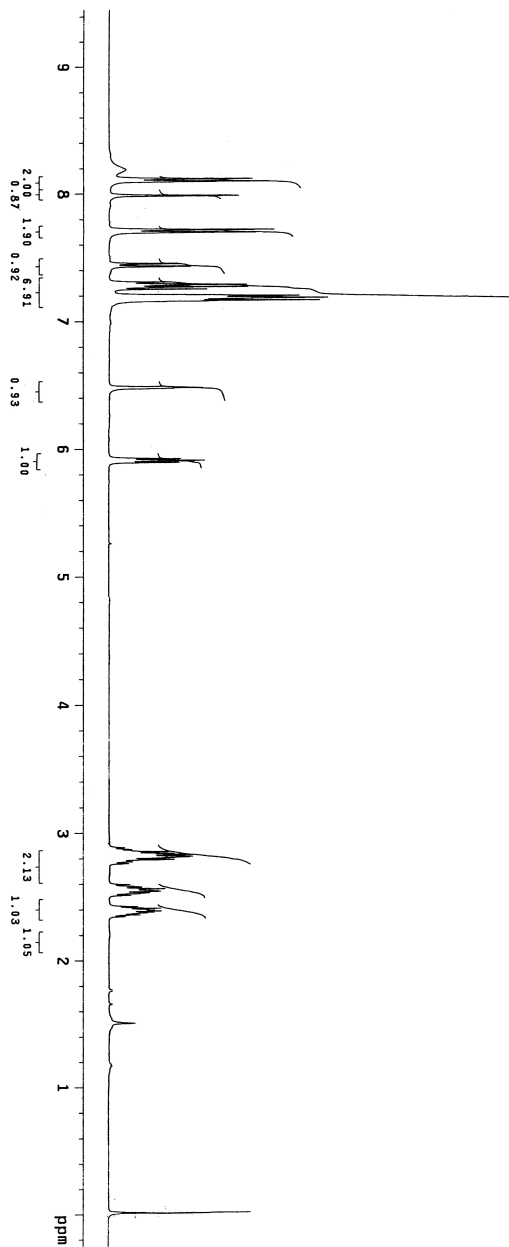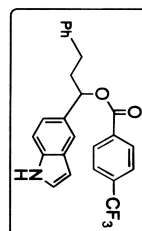



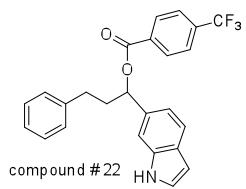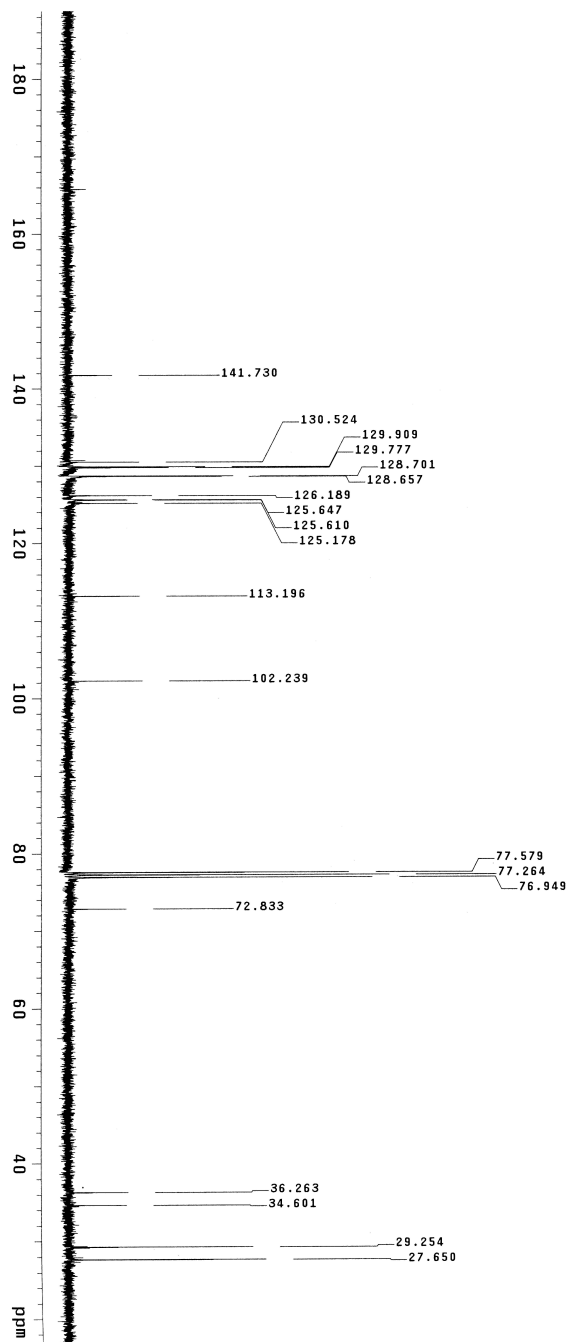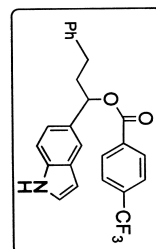

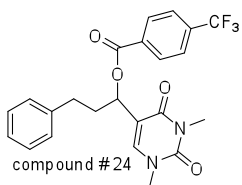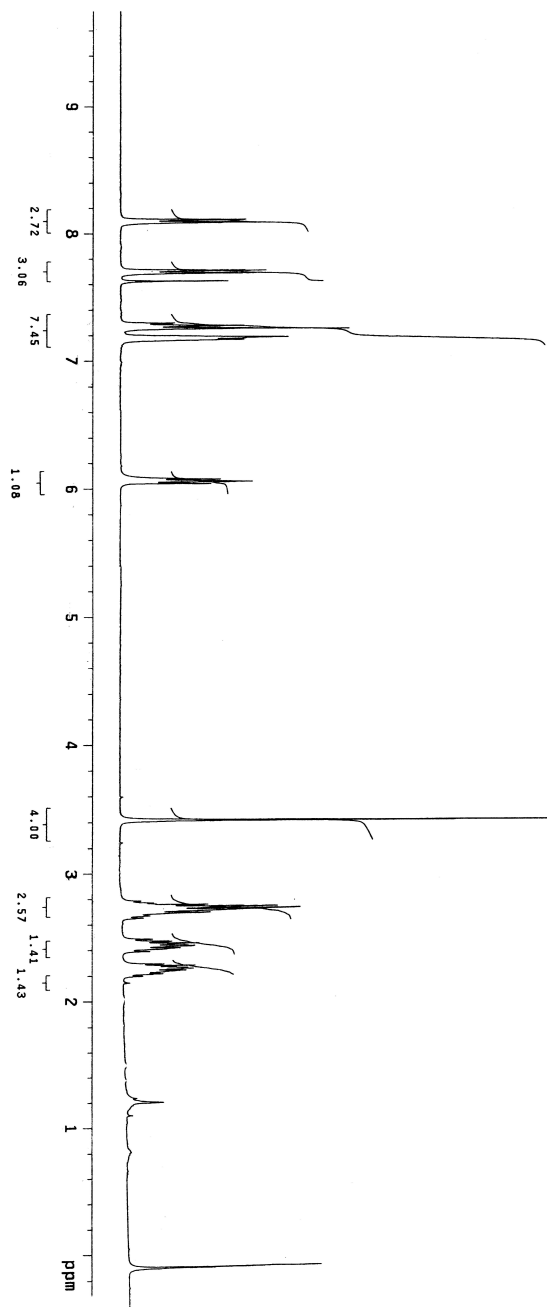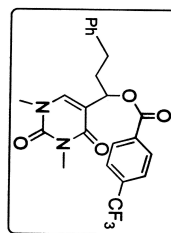

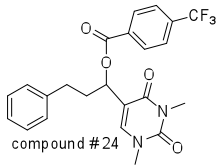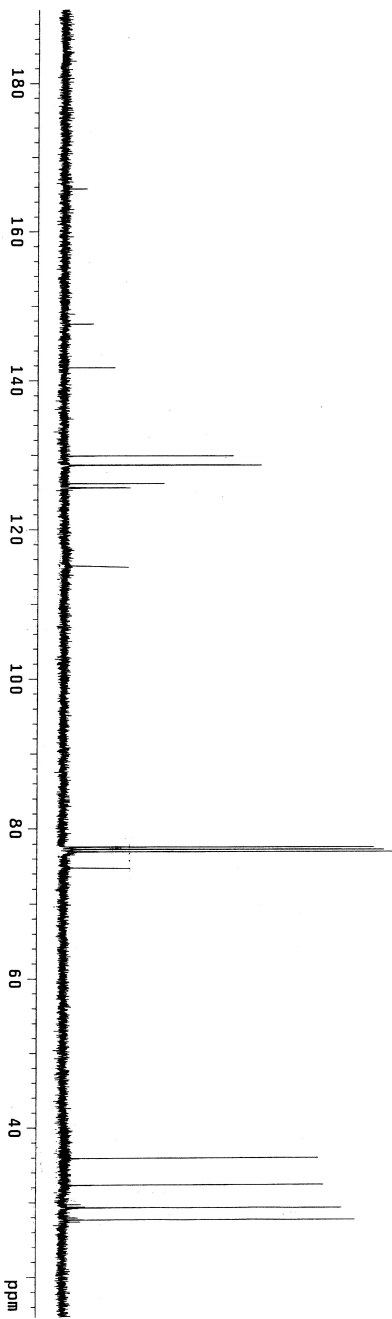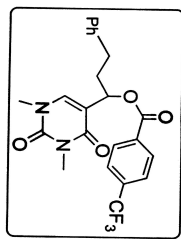

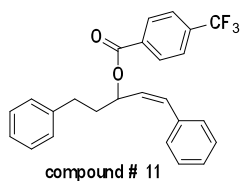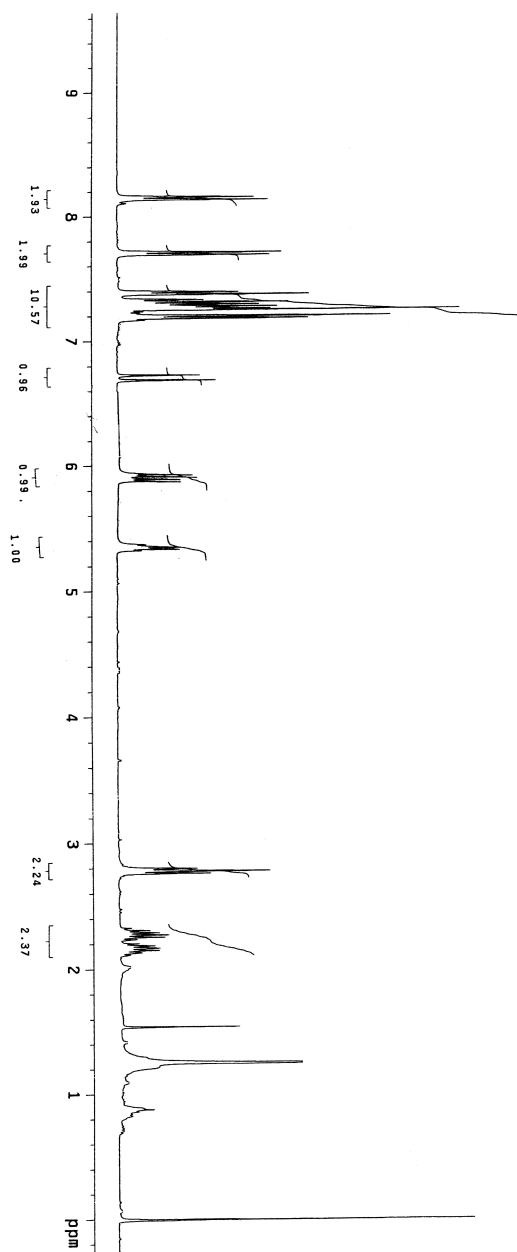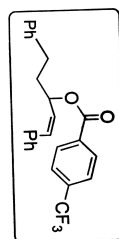

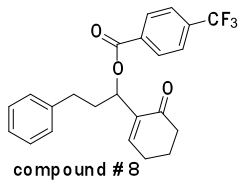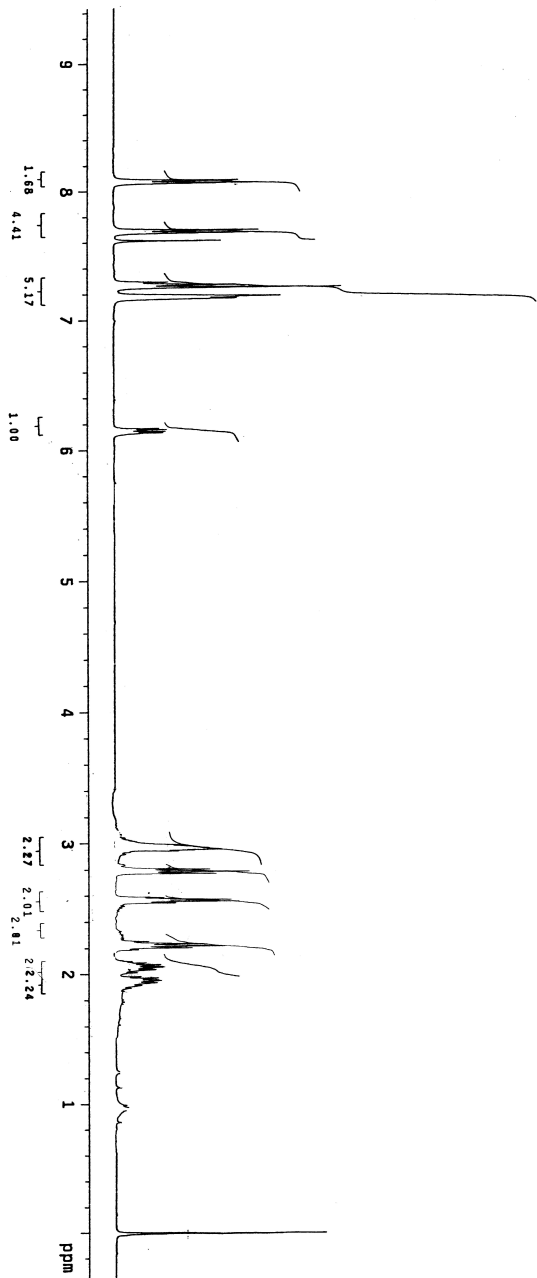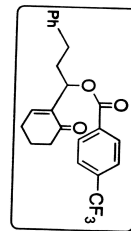

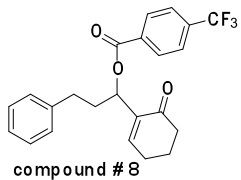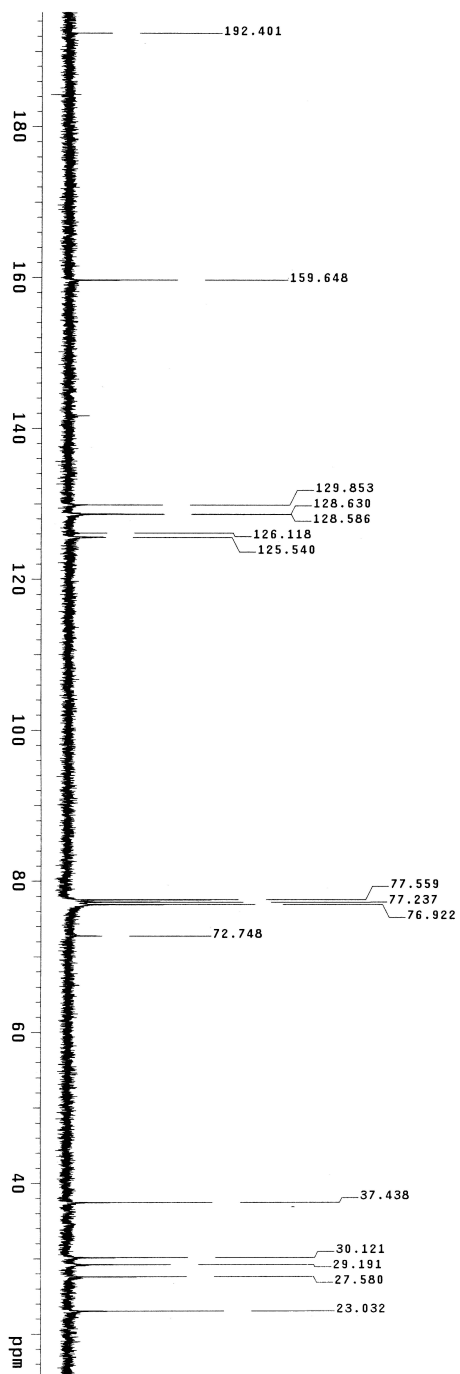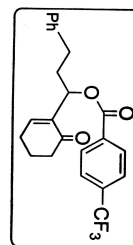

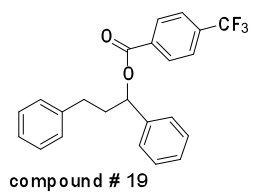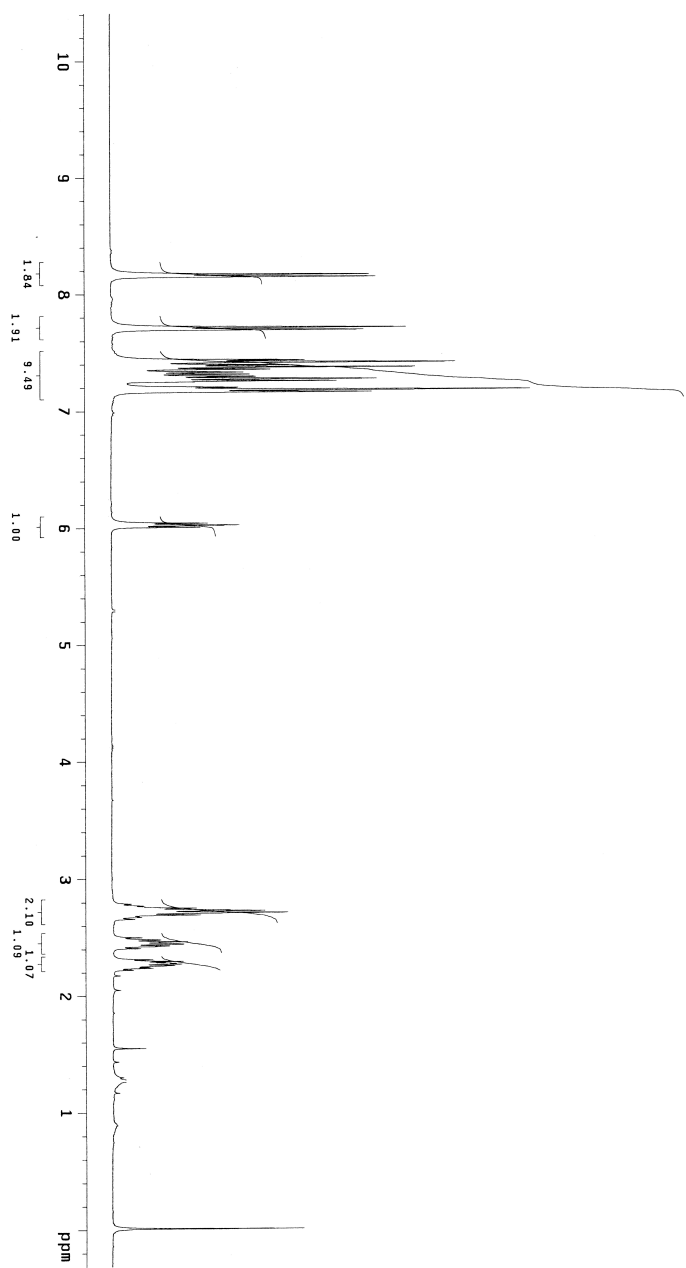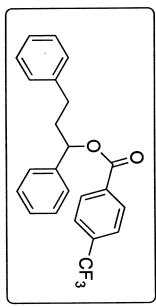

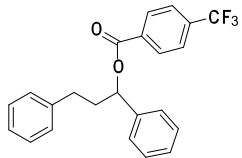

compound # 19

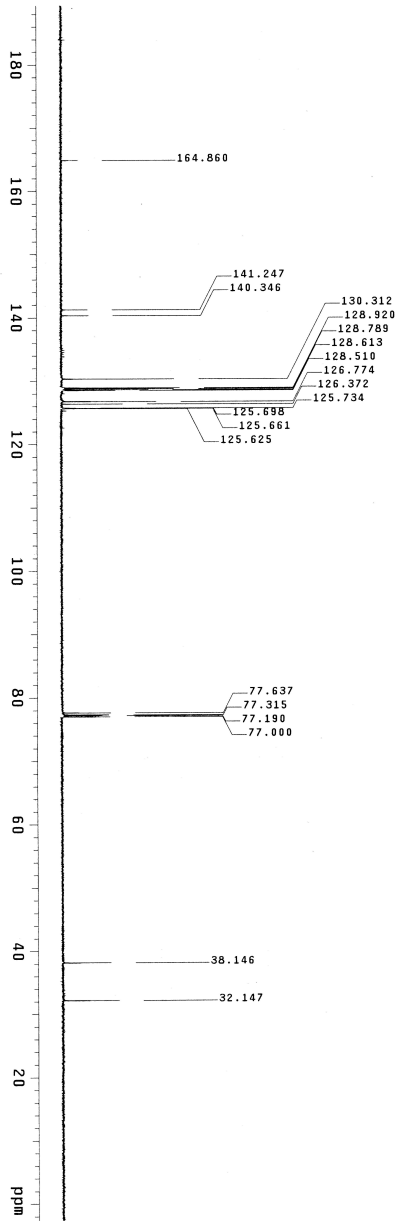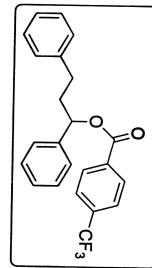



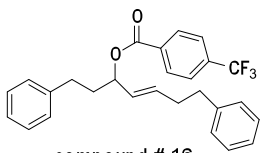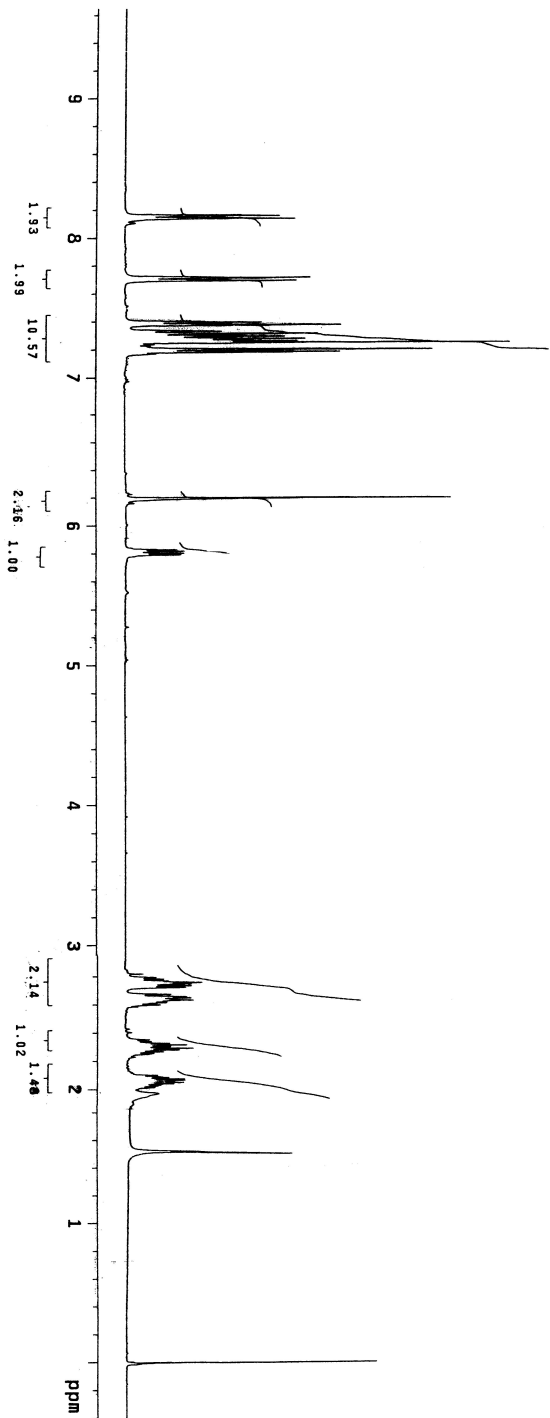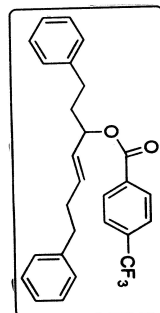

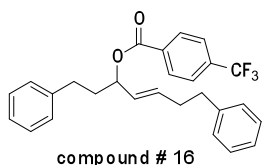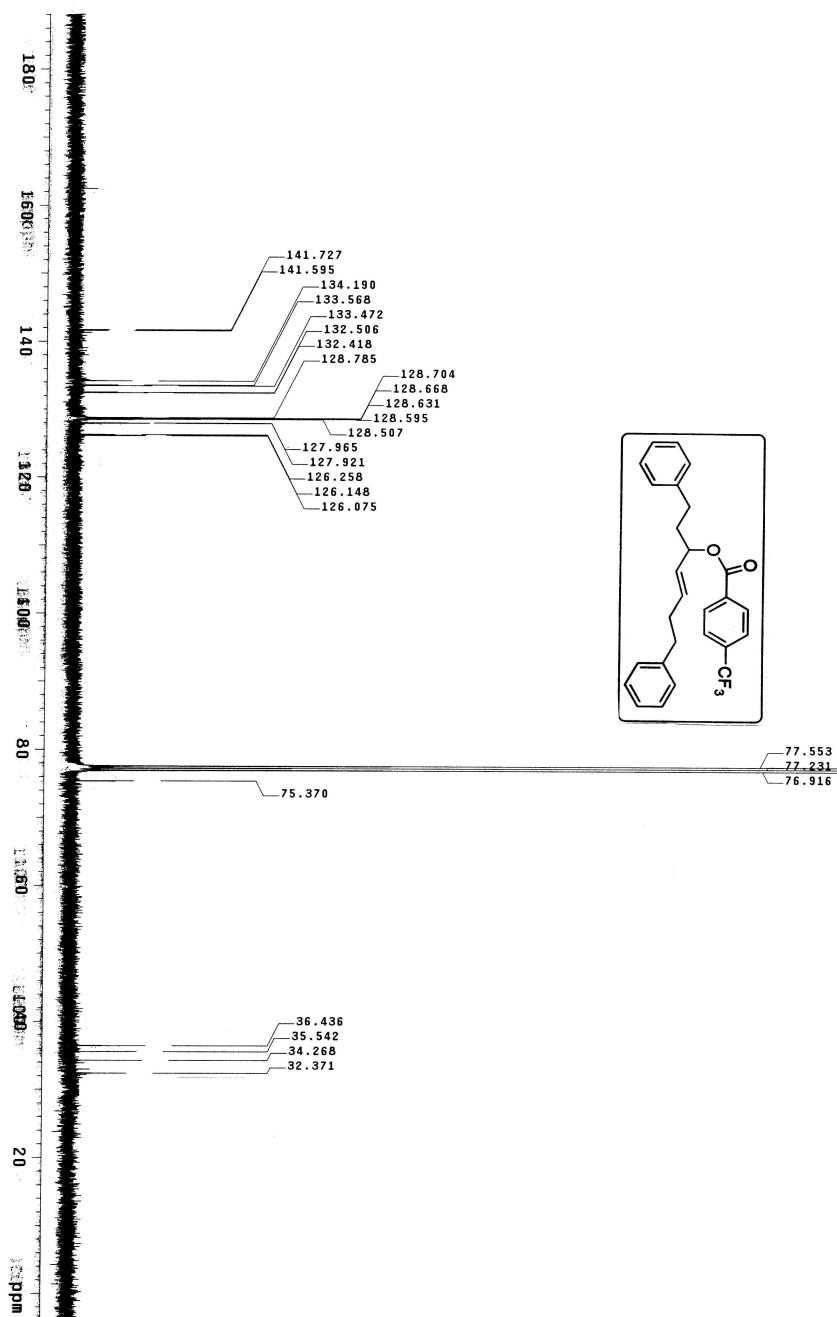

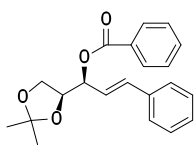

compound #28

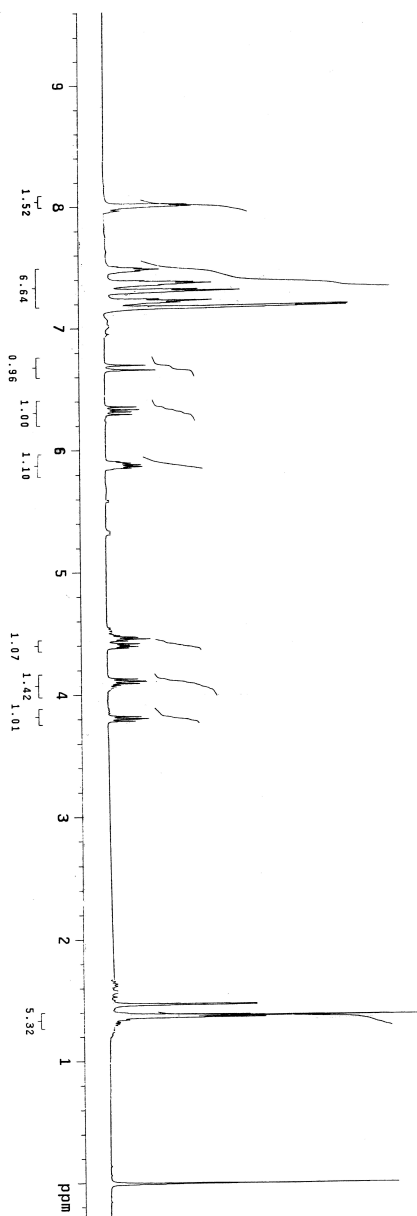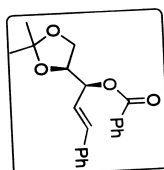

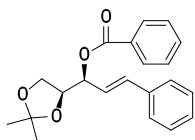

compound # 28

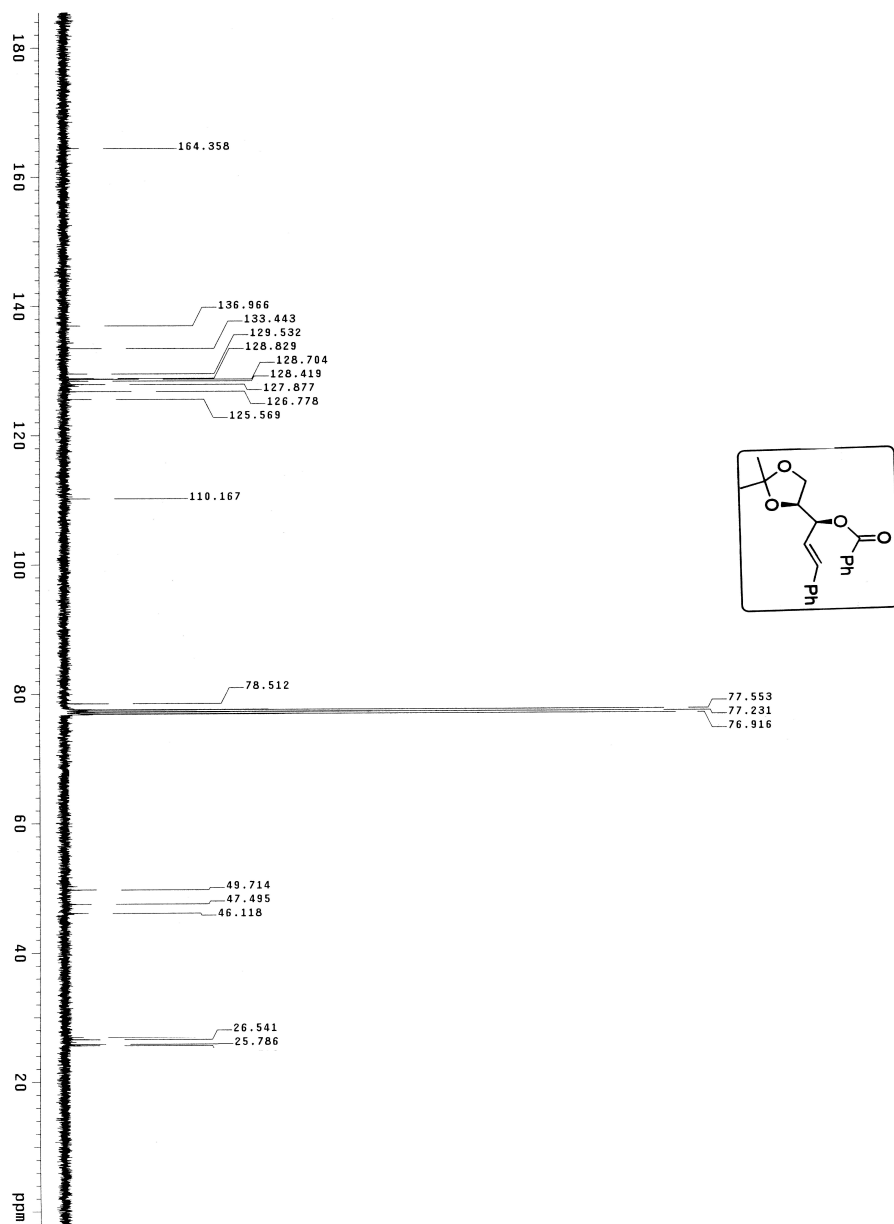

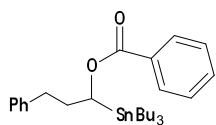

compound # 25

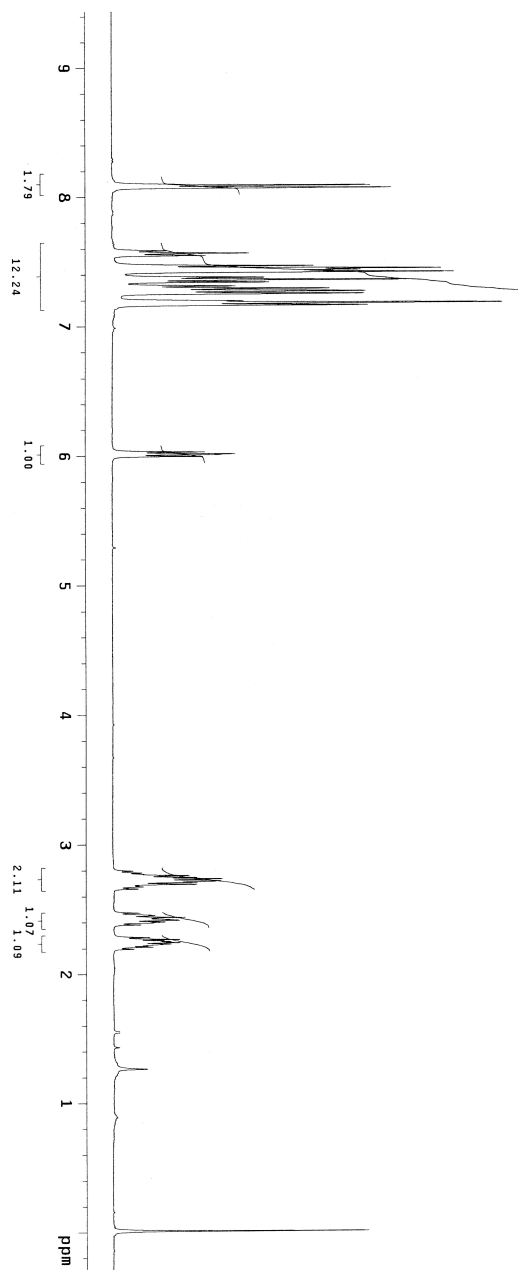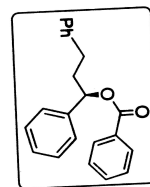

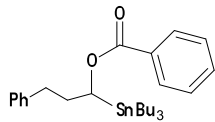

compound # 25

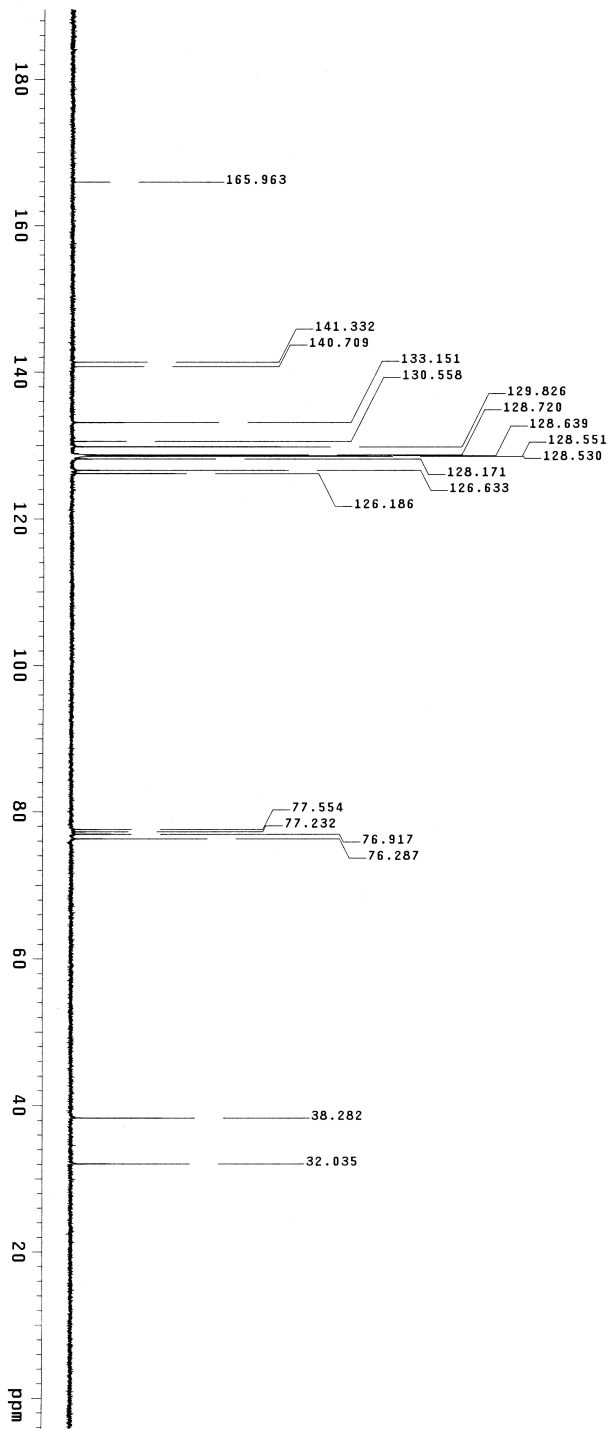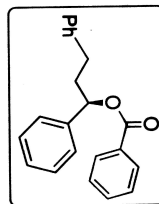

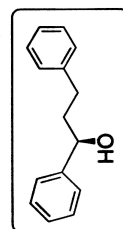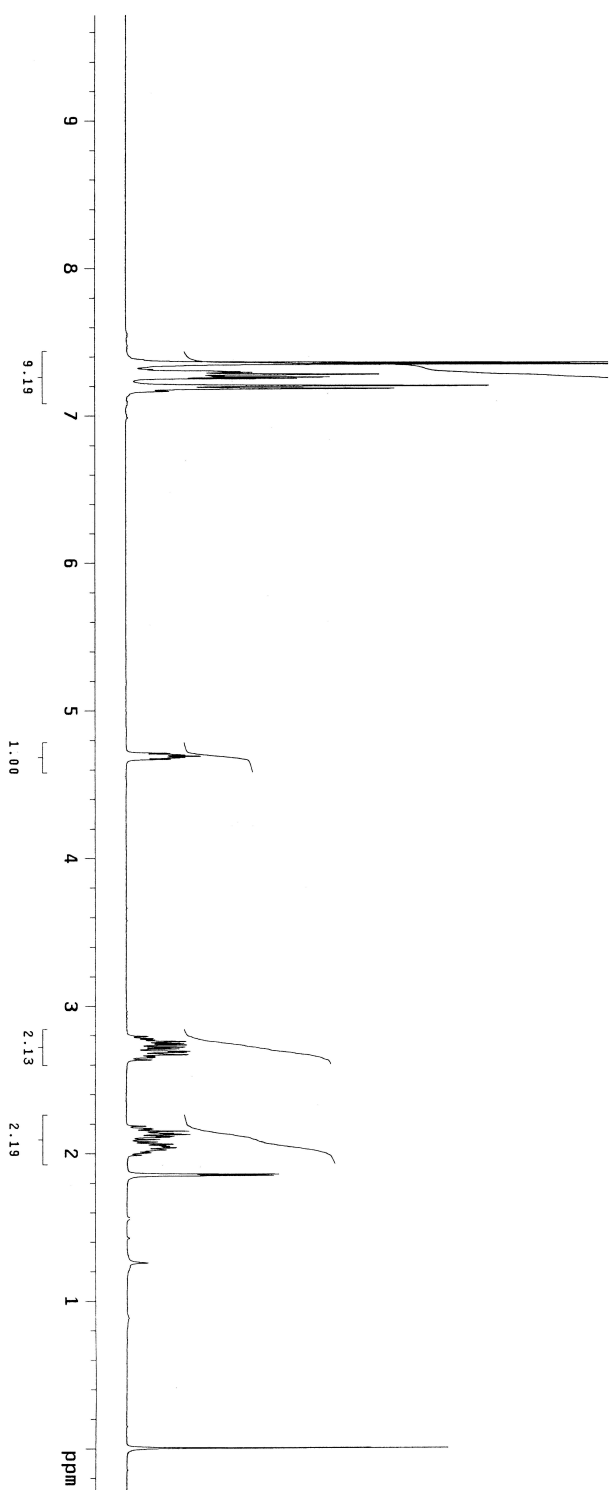

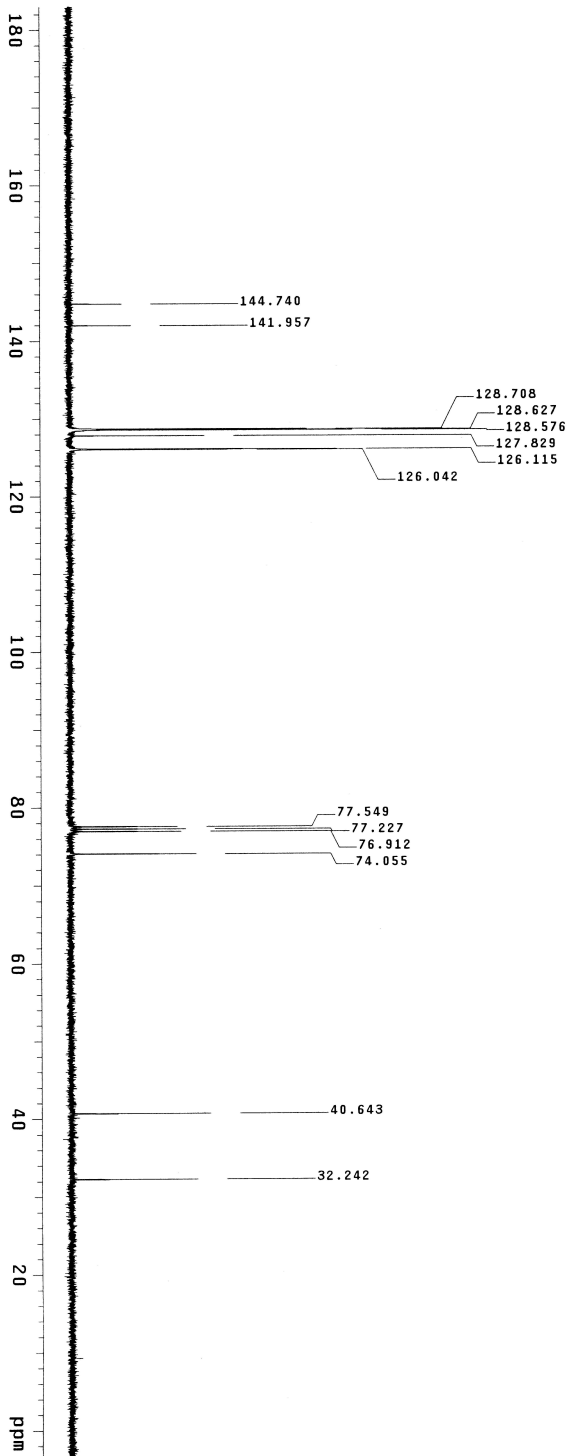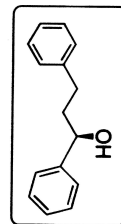



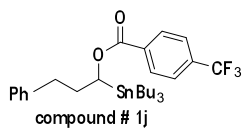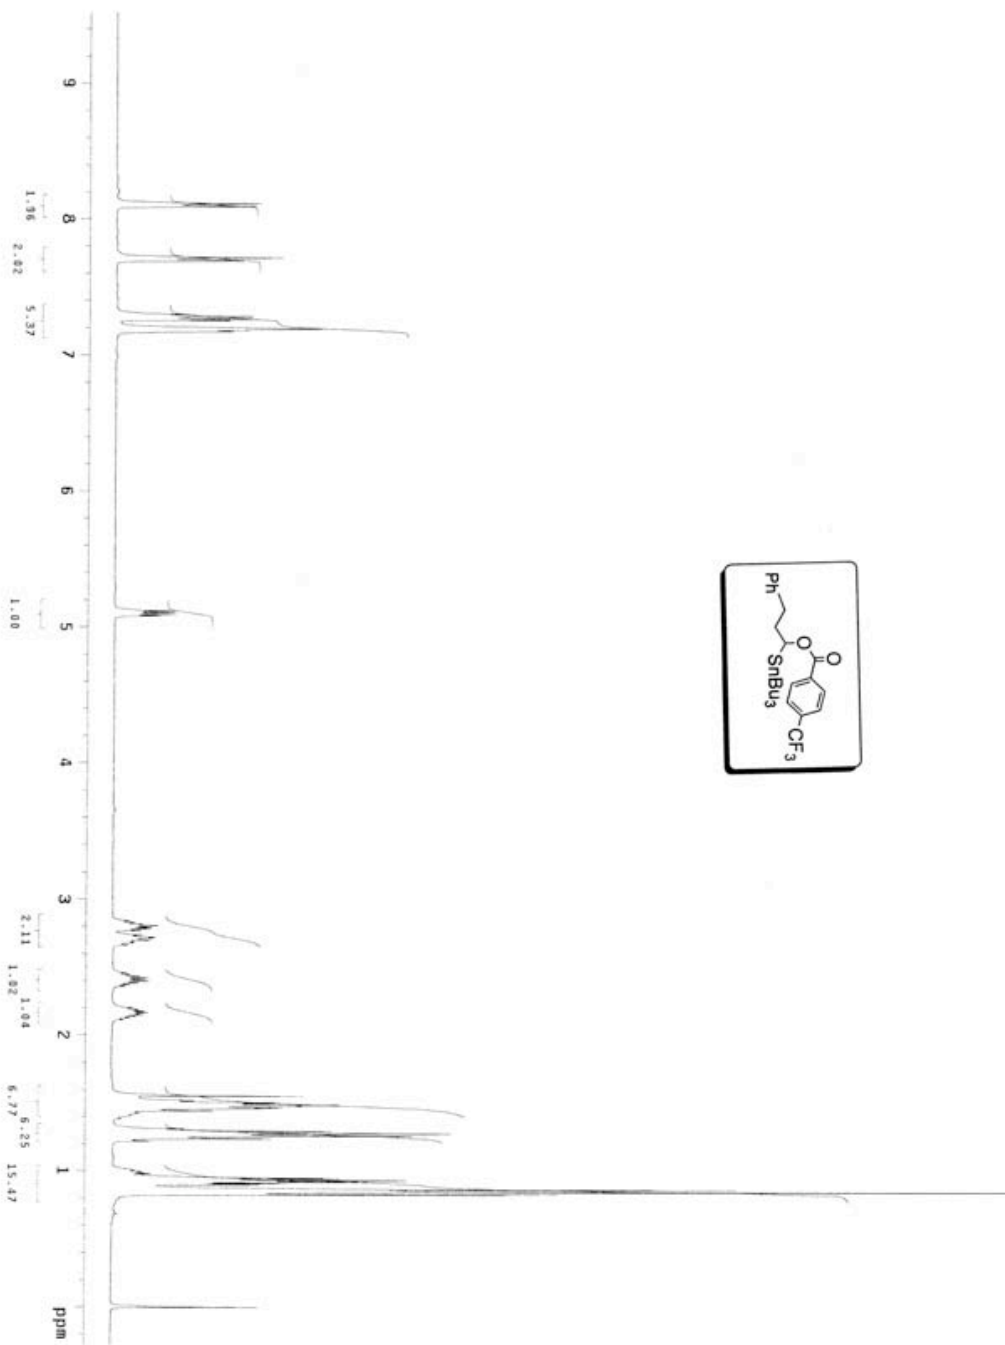

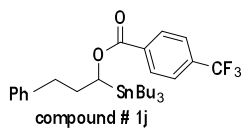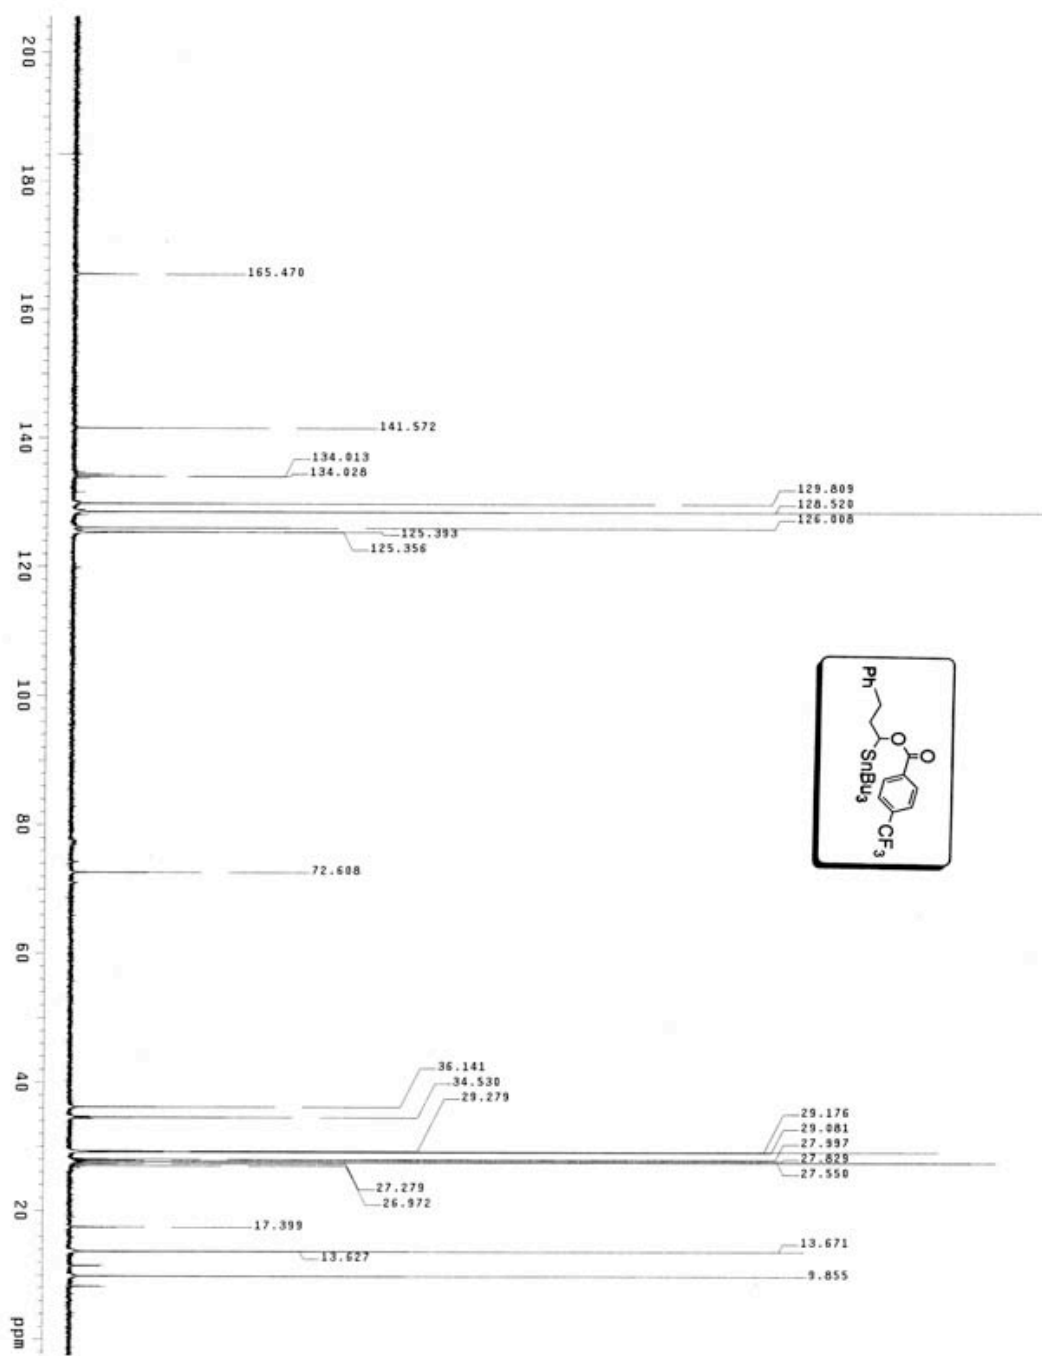

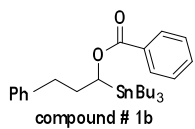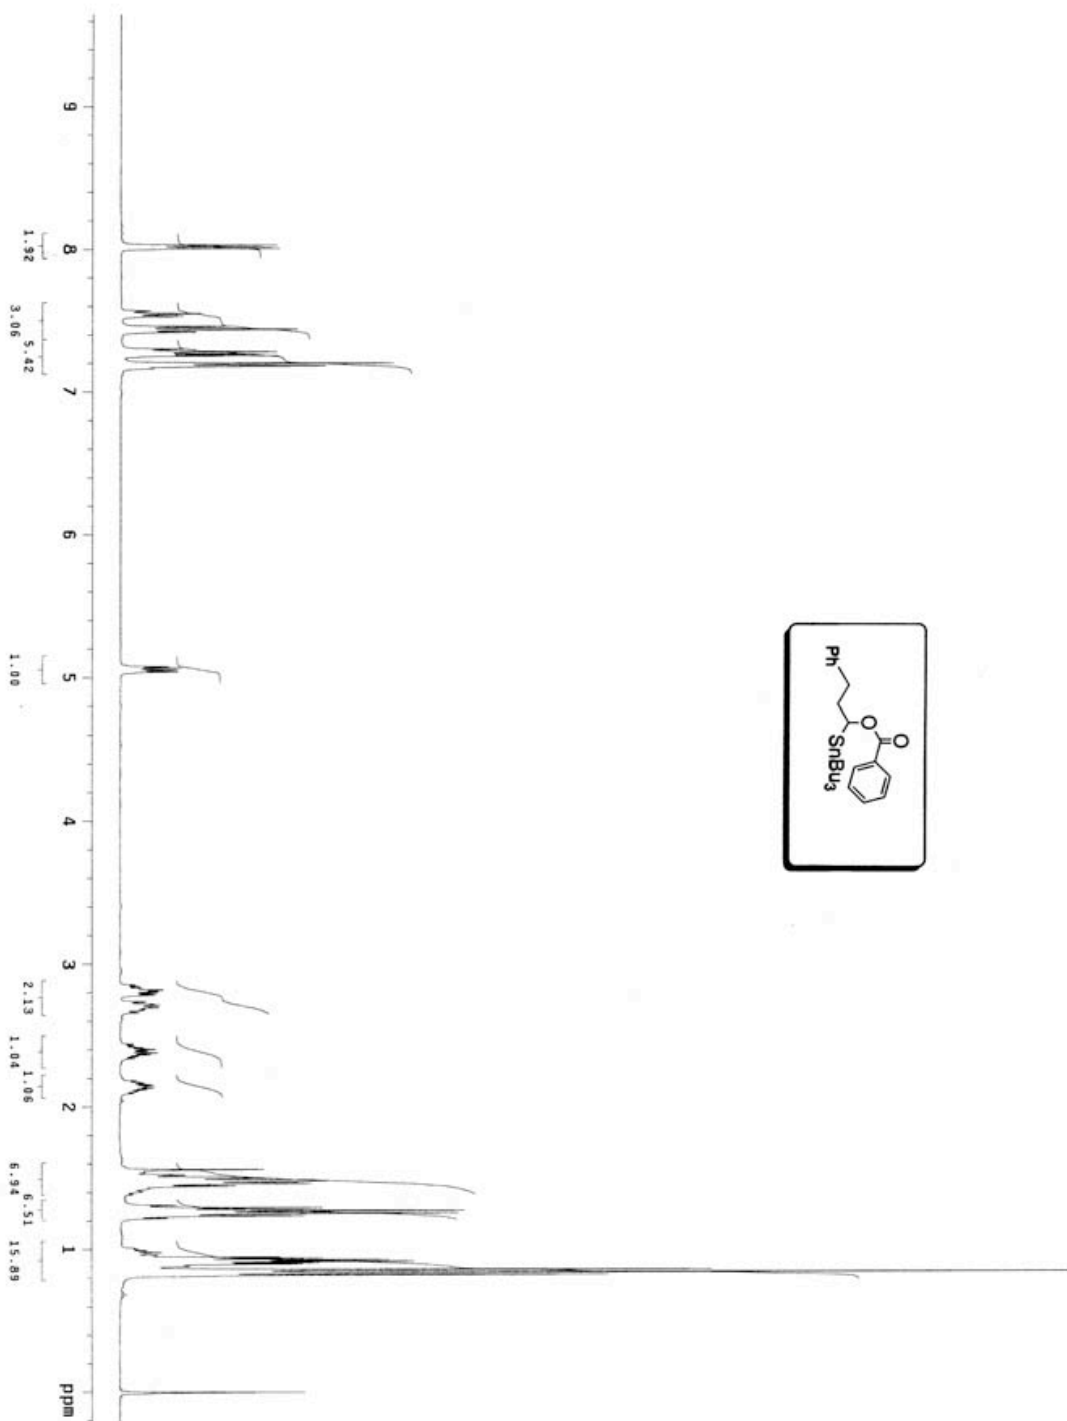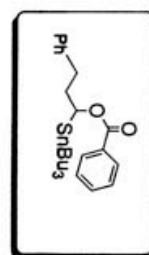

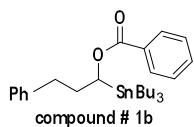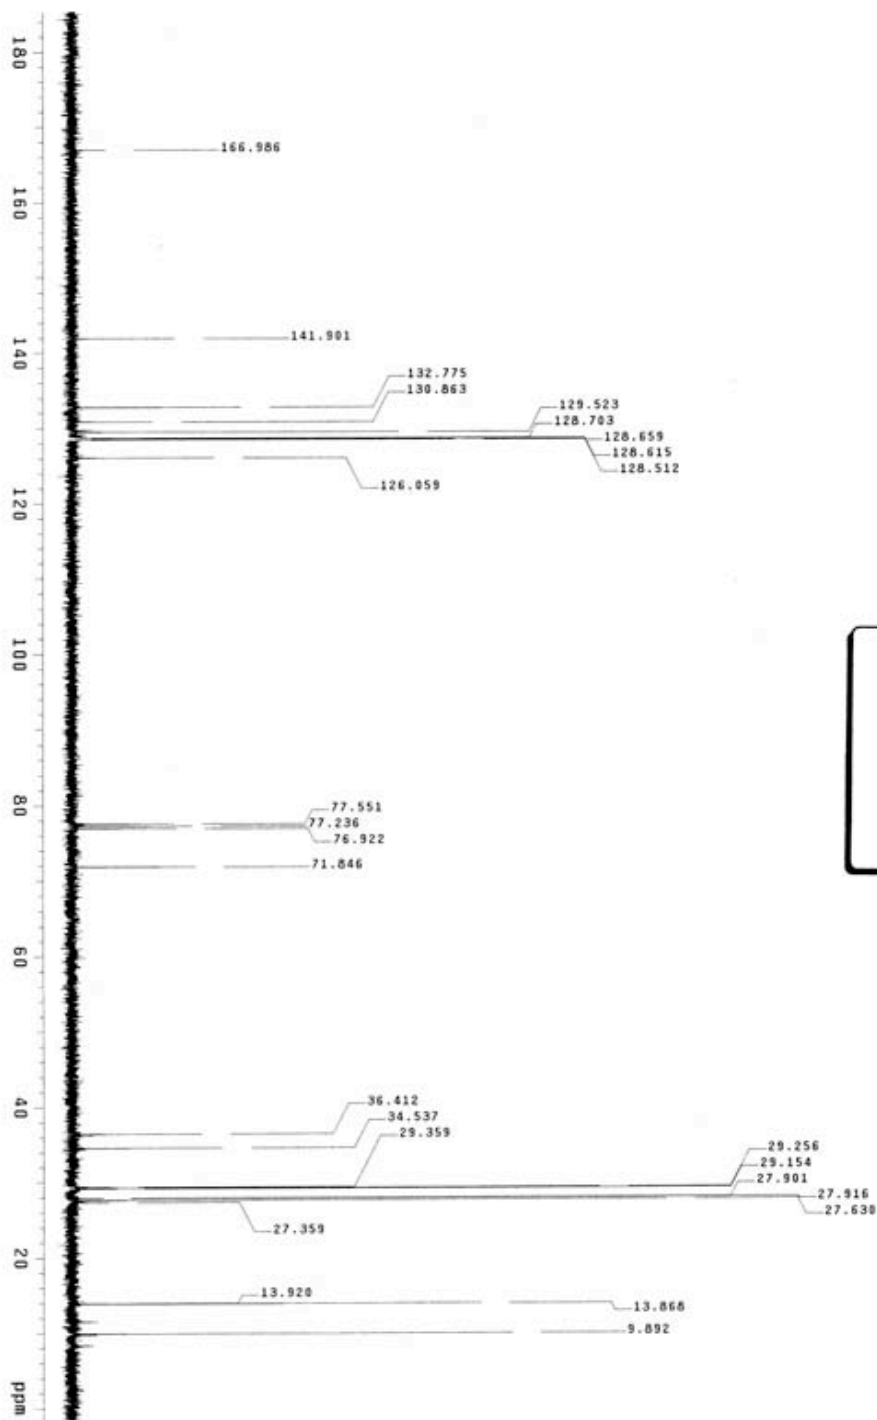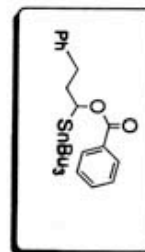

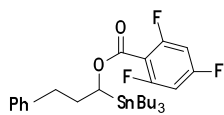

compound # 1h

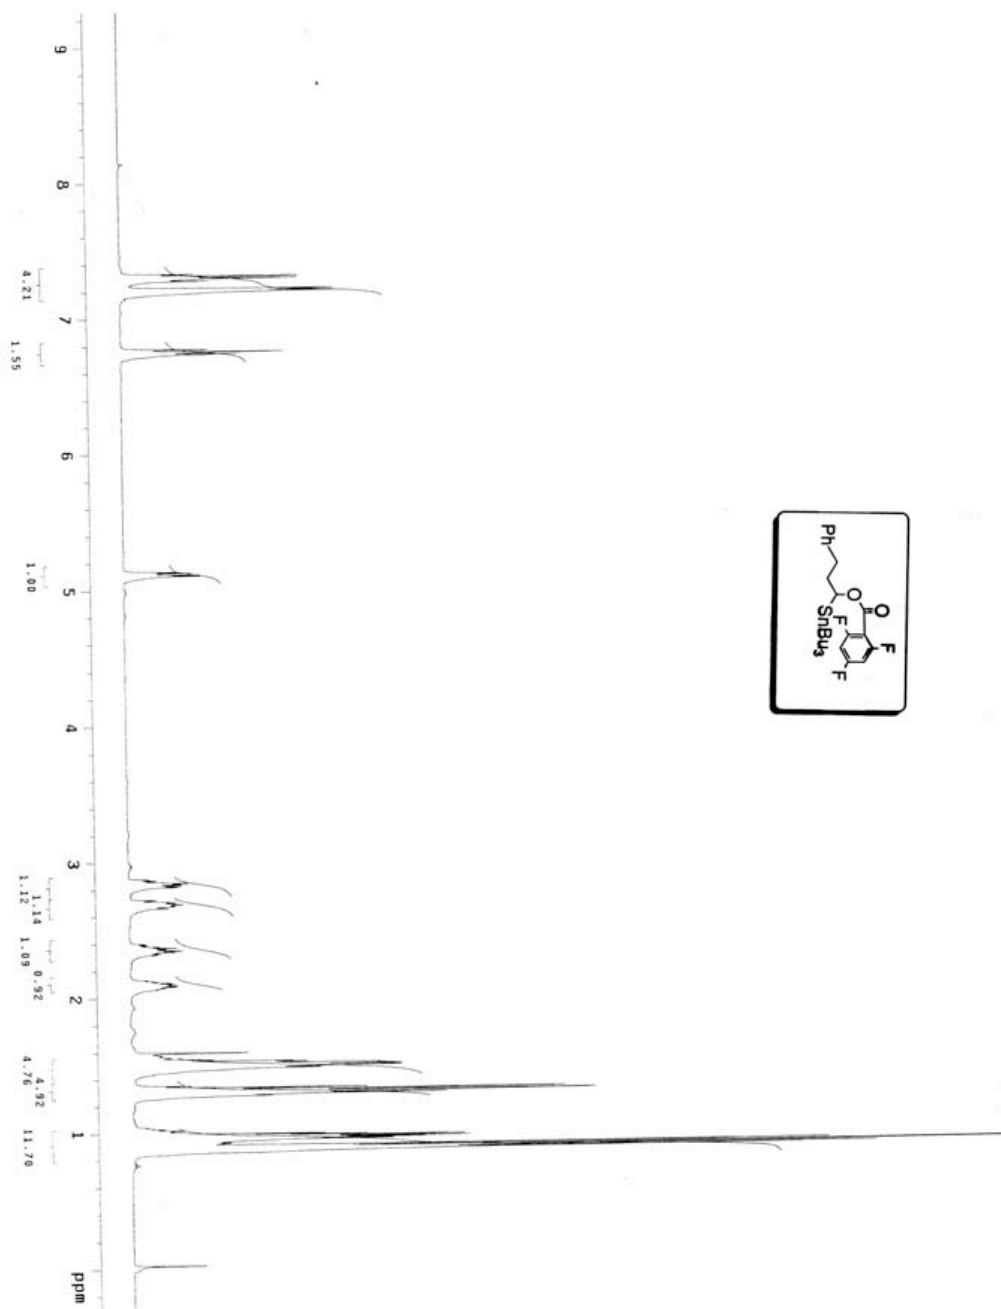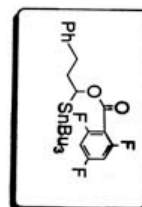

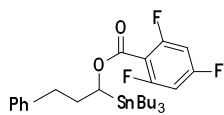

compound # 1h

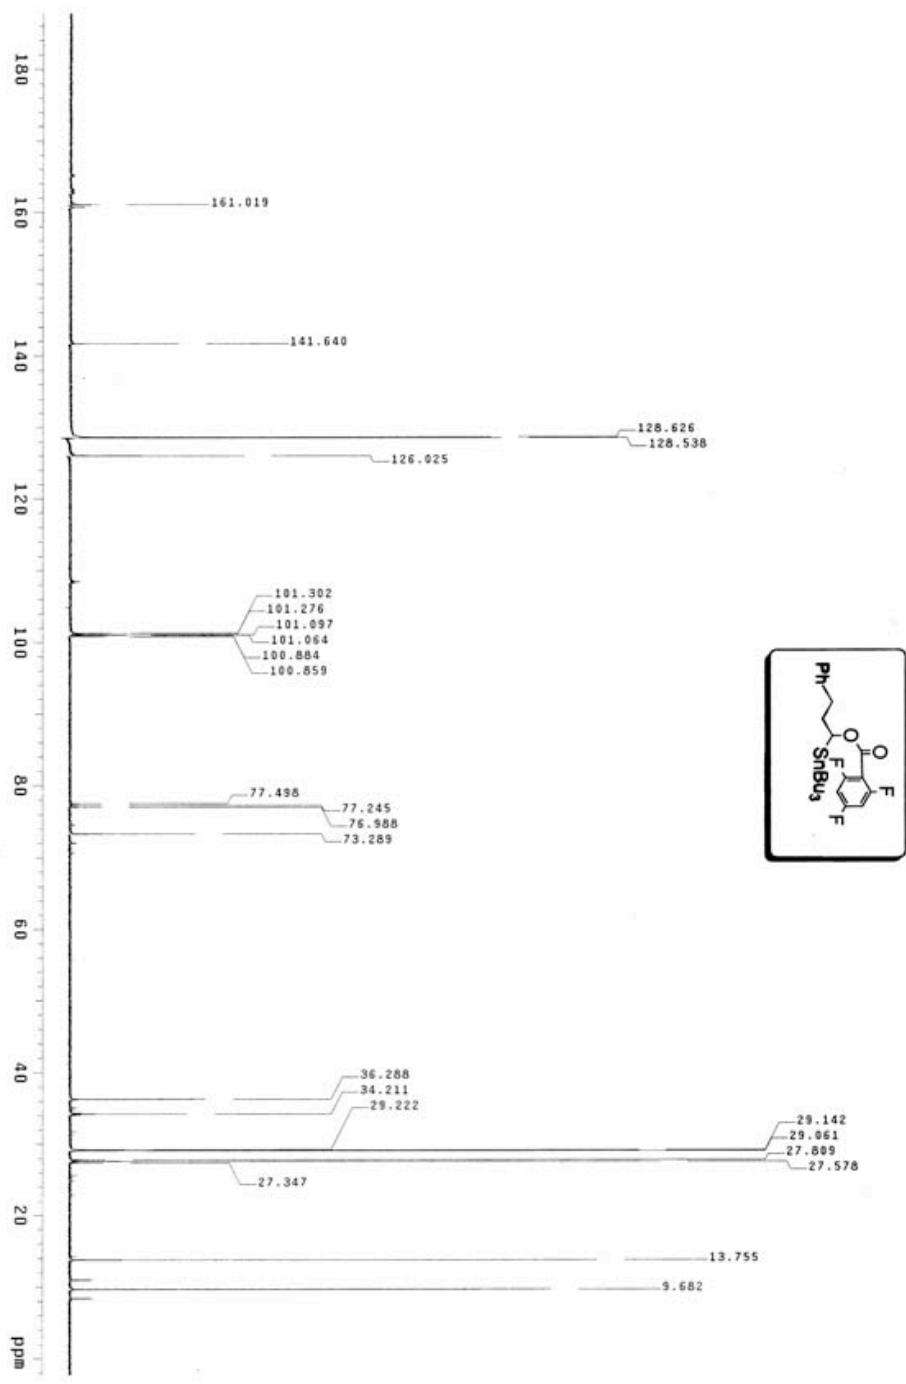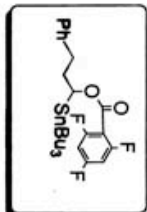

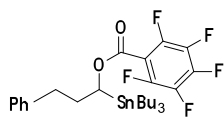

compound # 1i

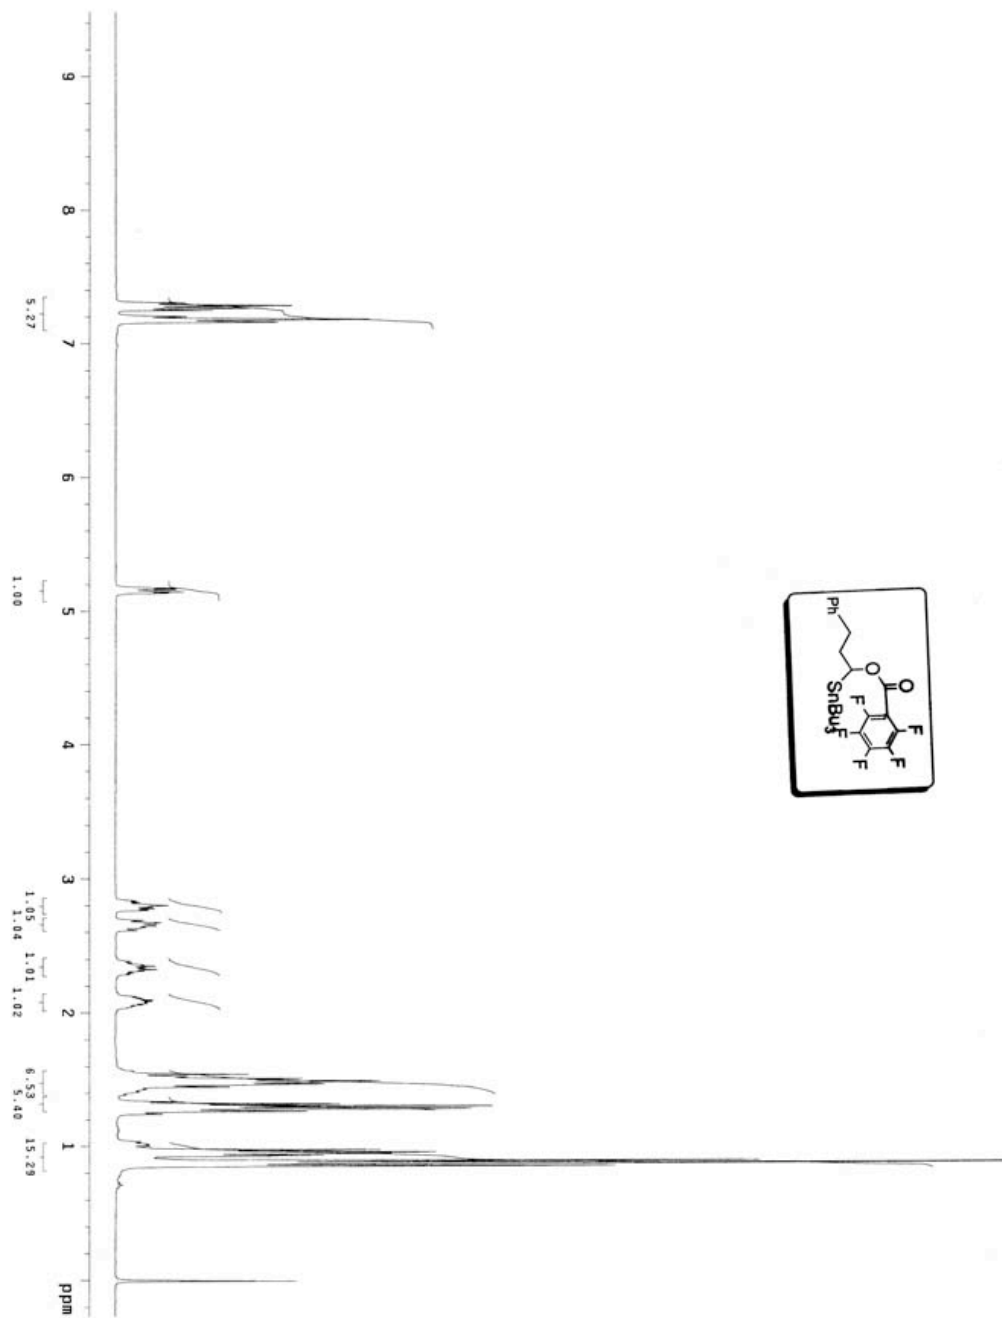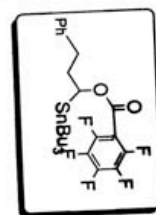

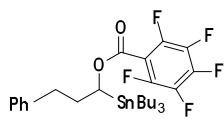

compound # 1i

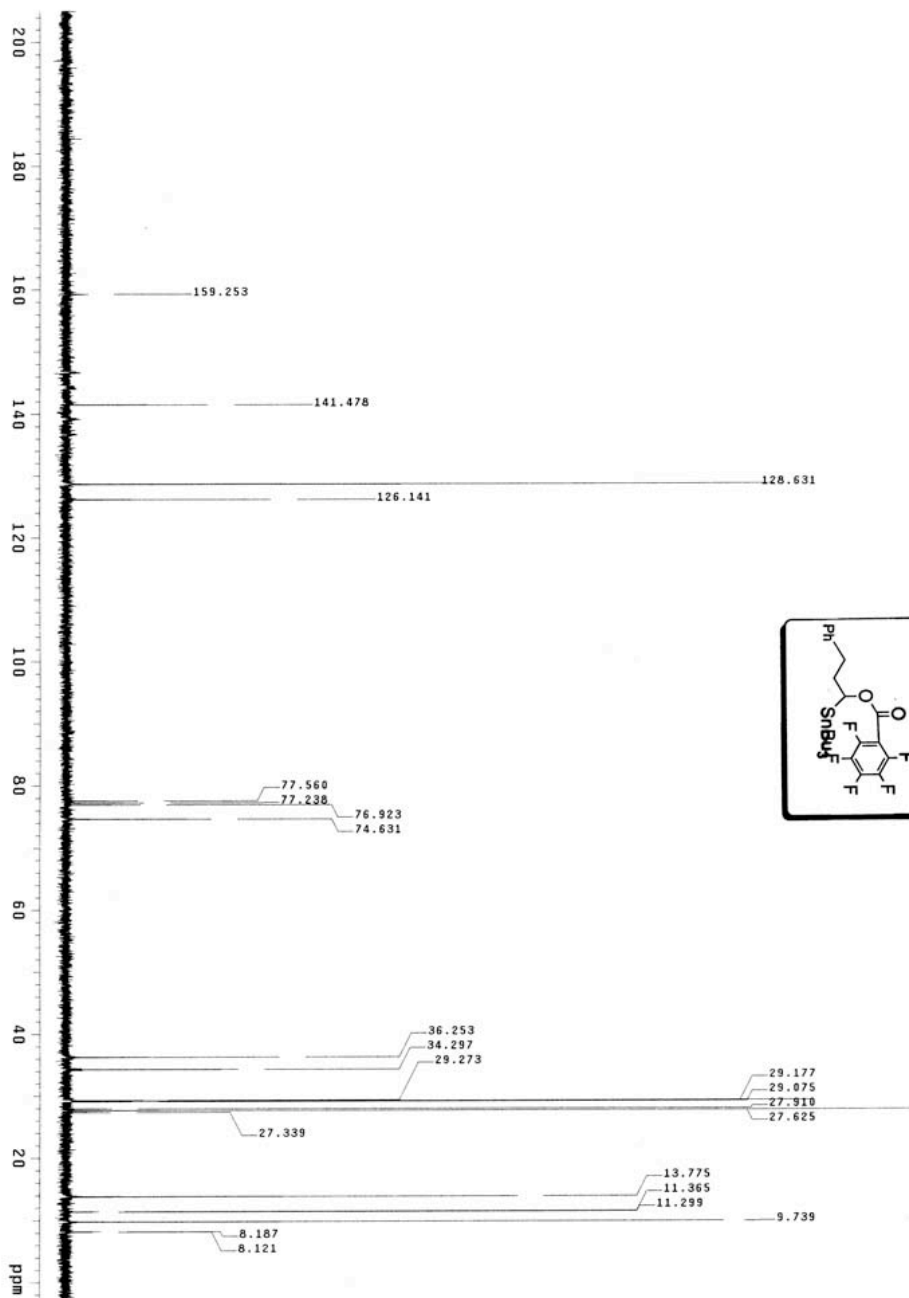



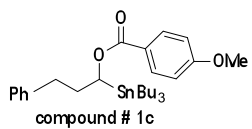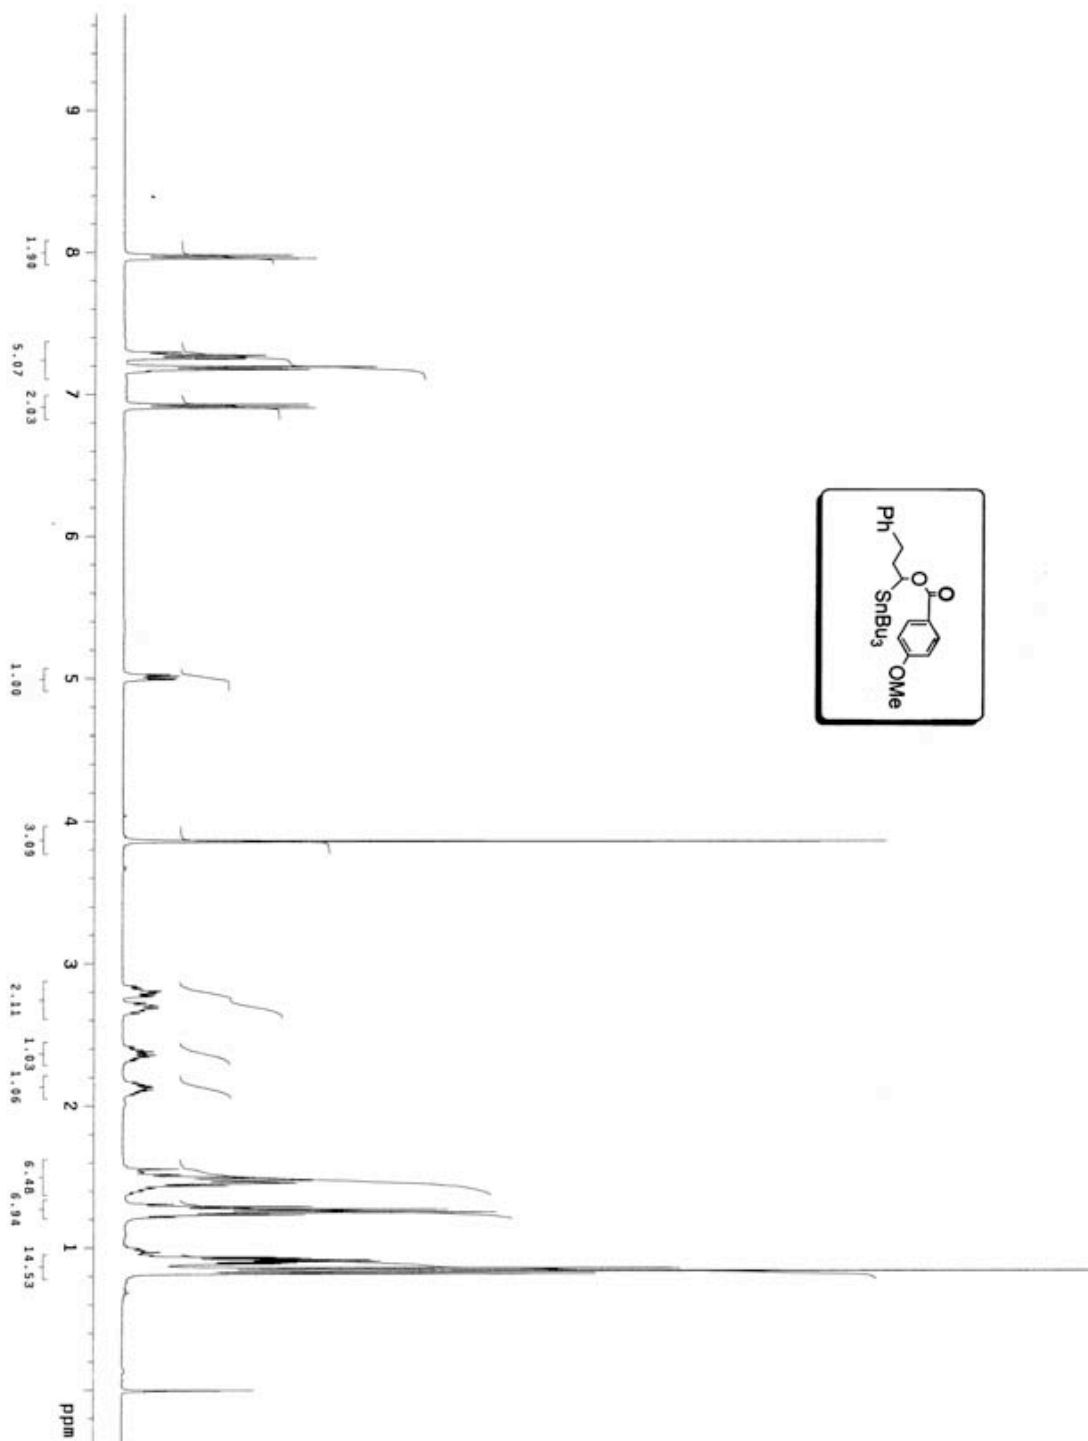

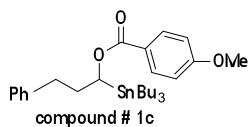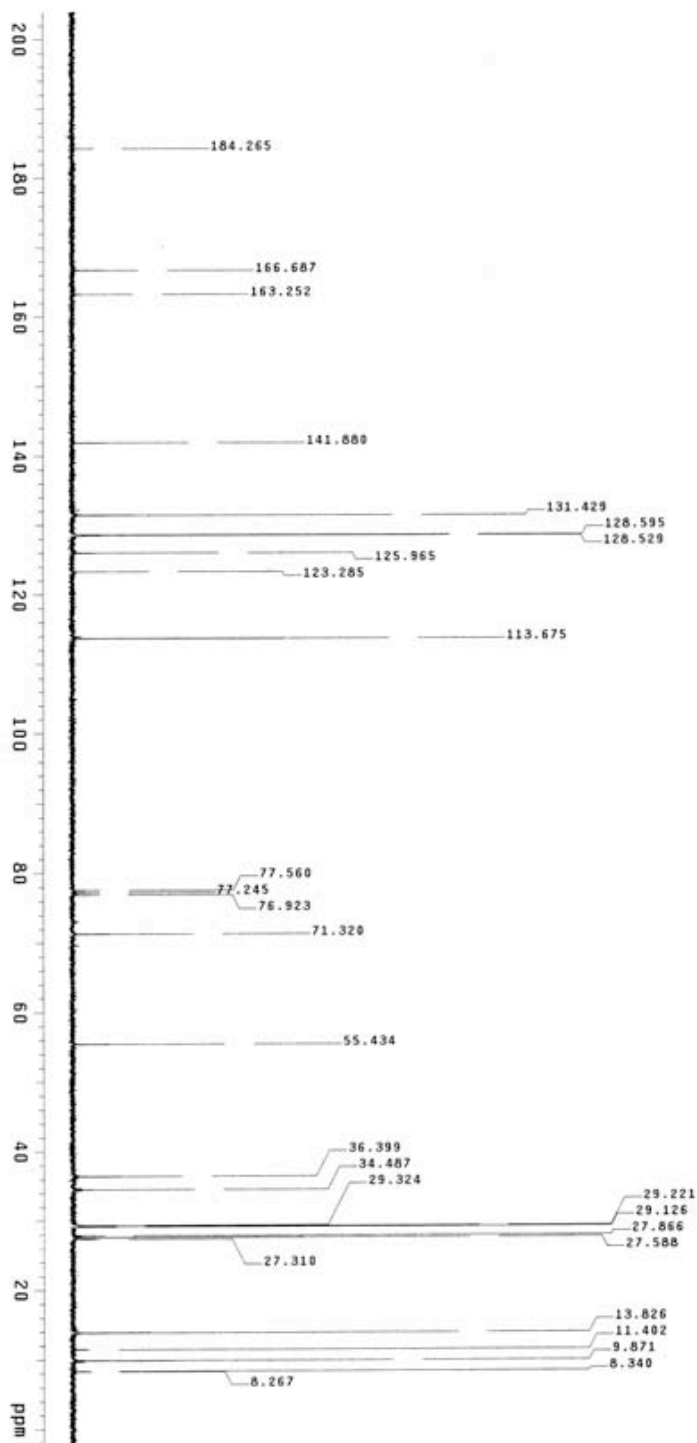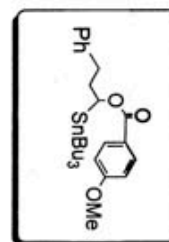

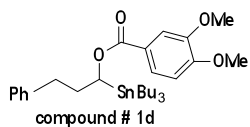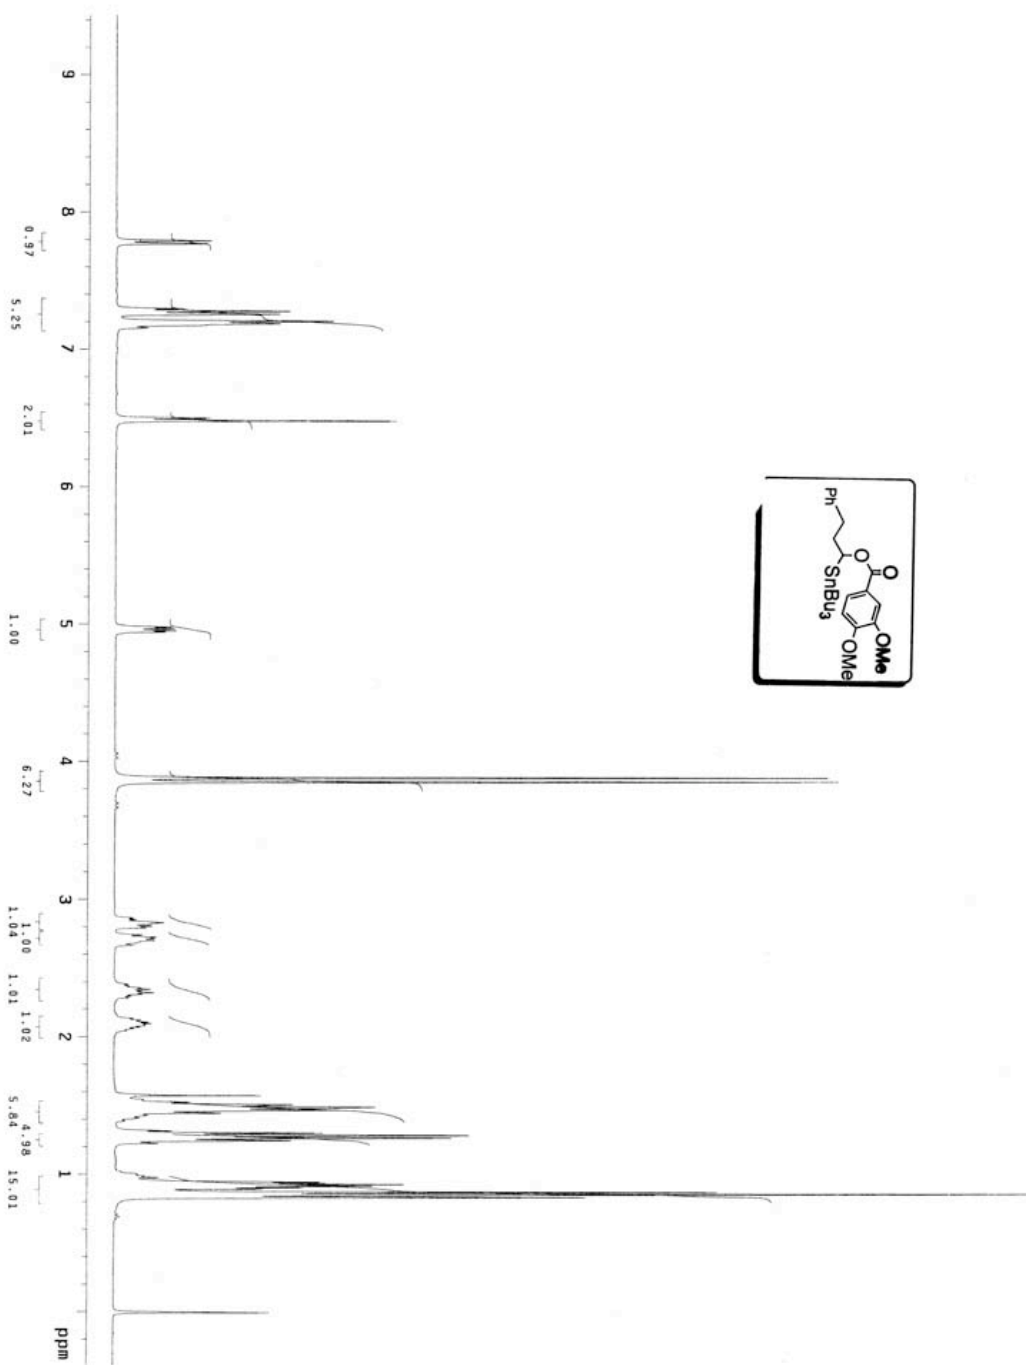

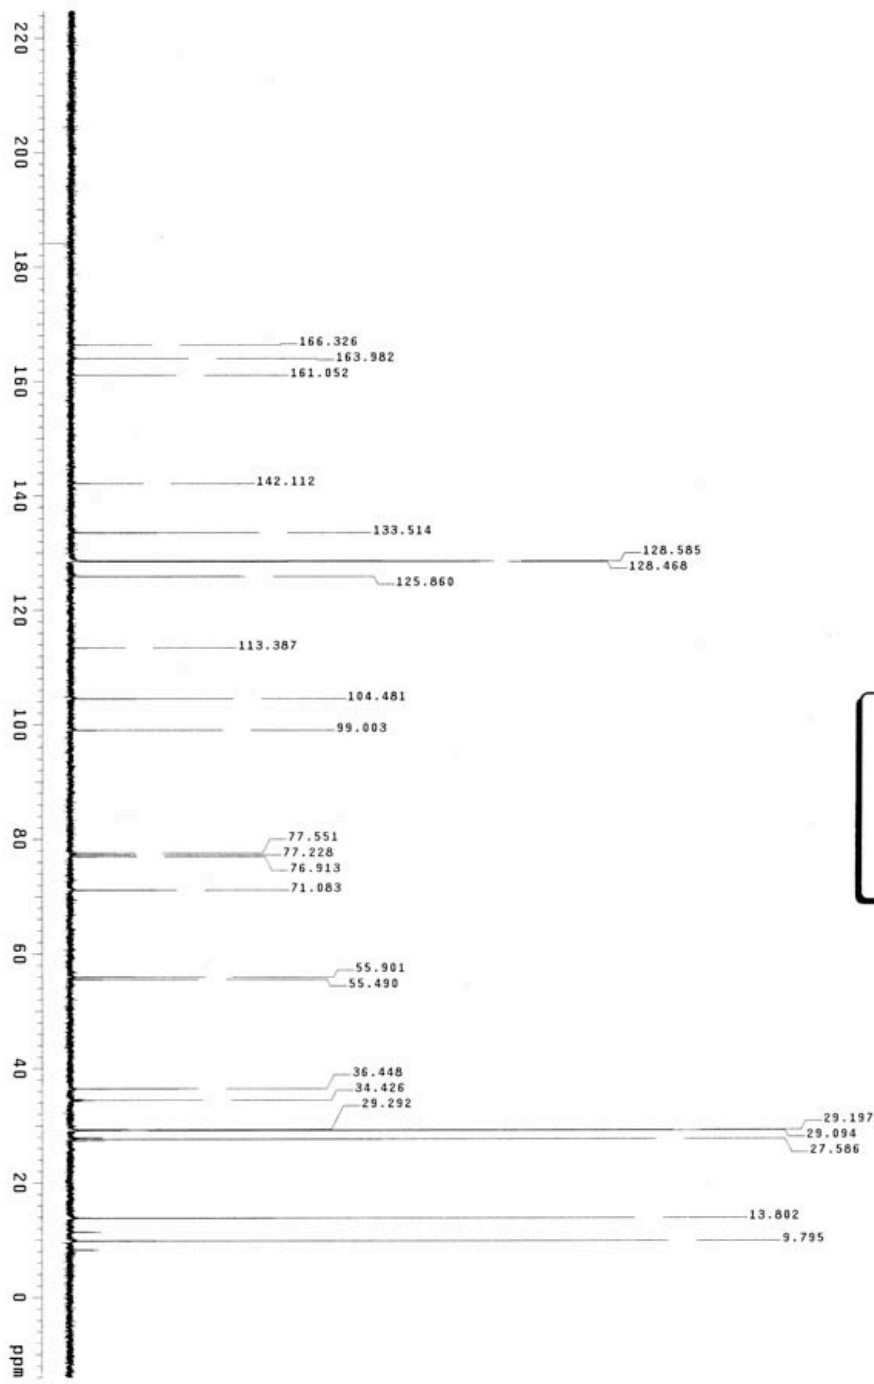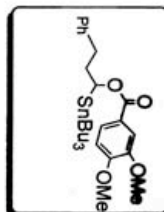

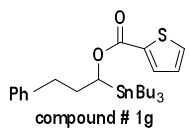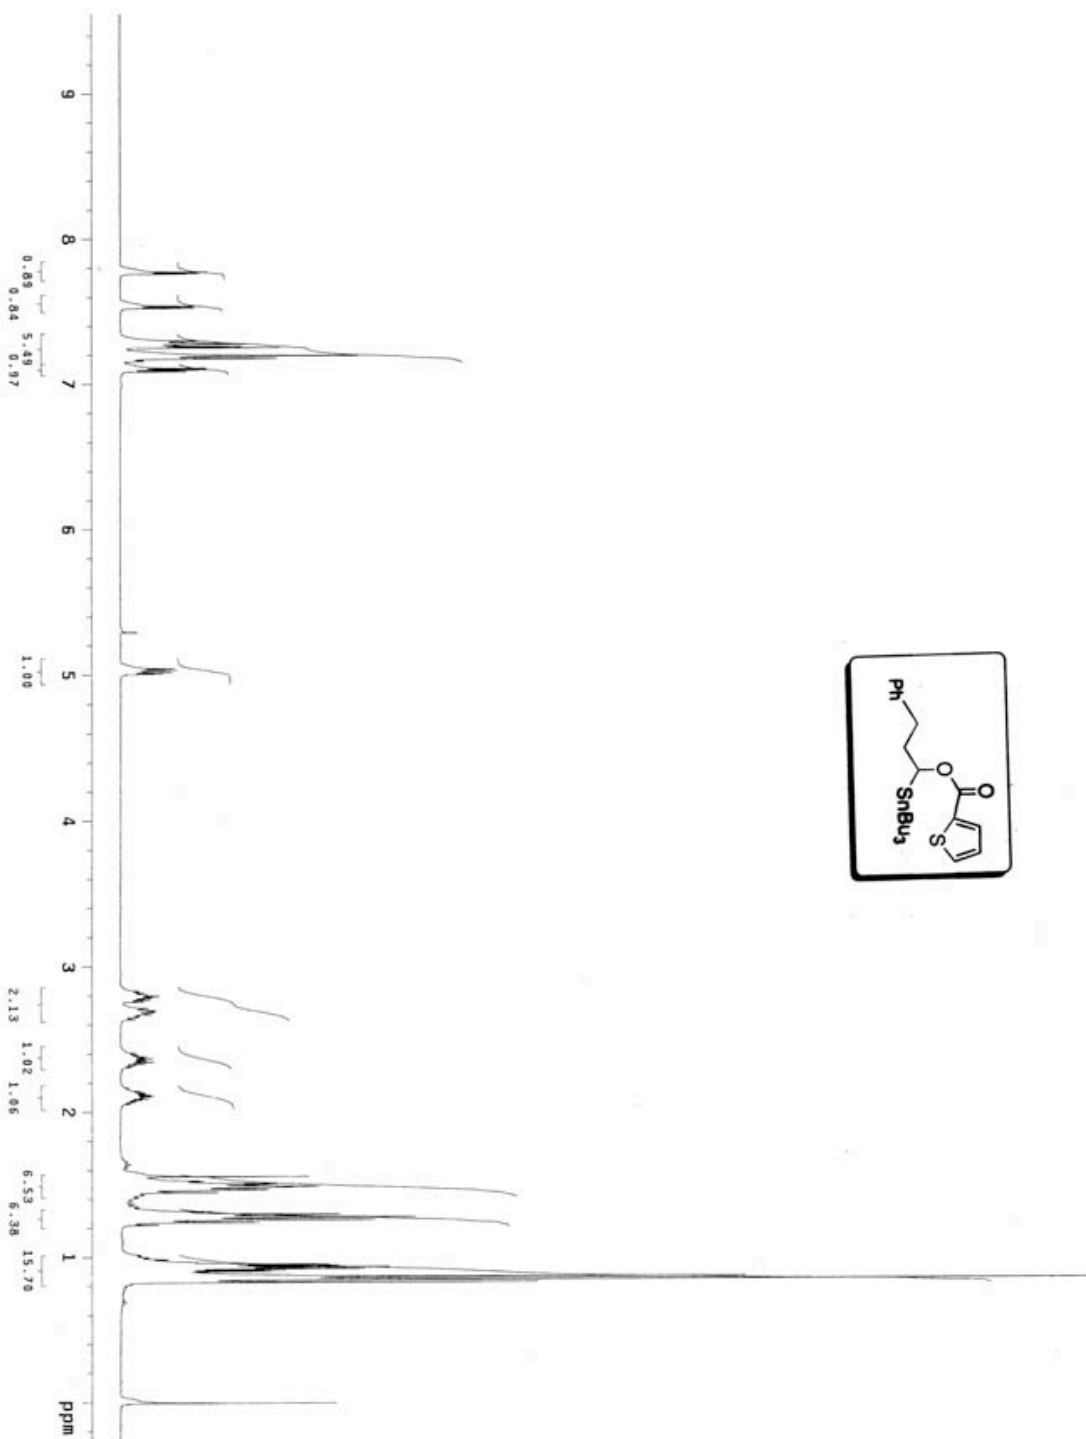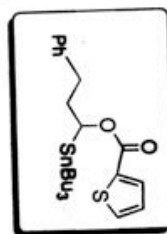

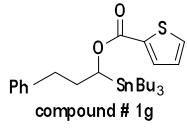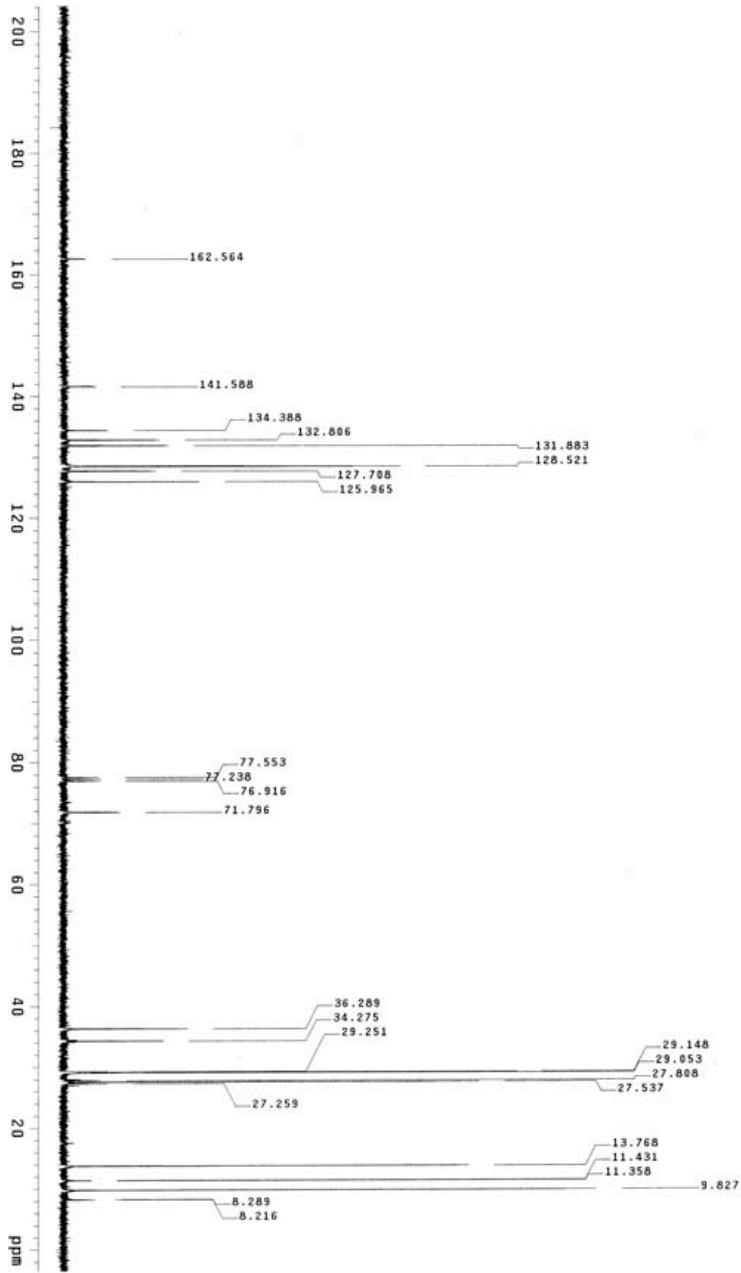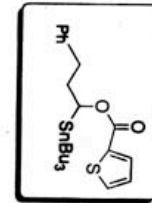

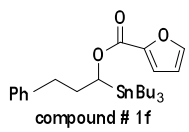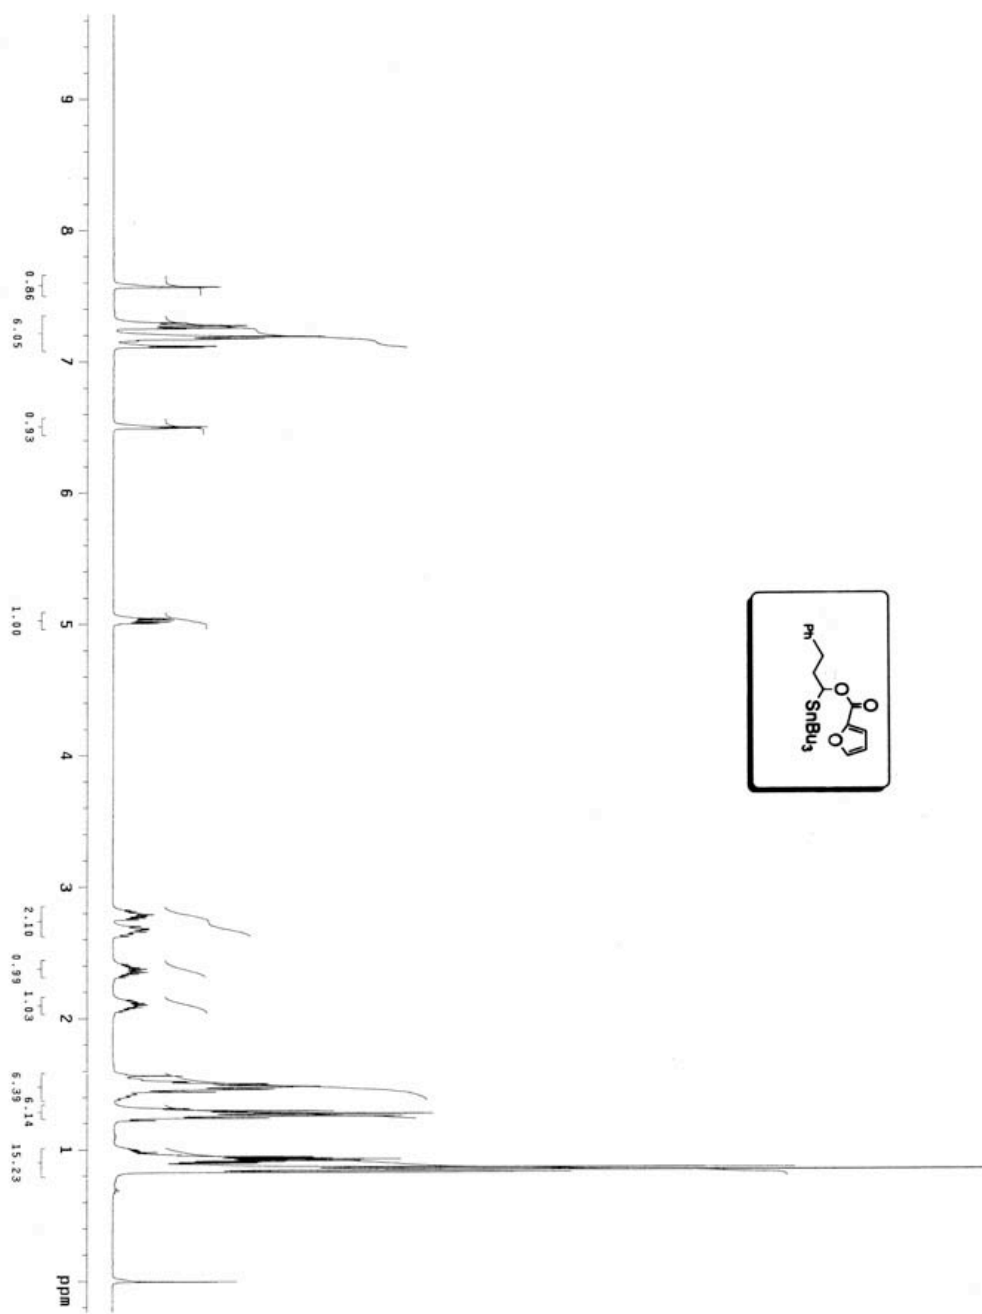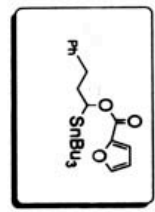

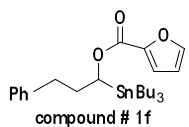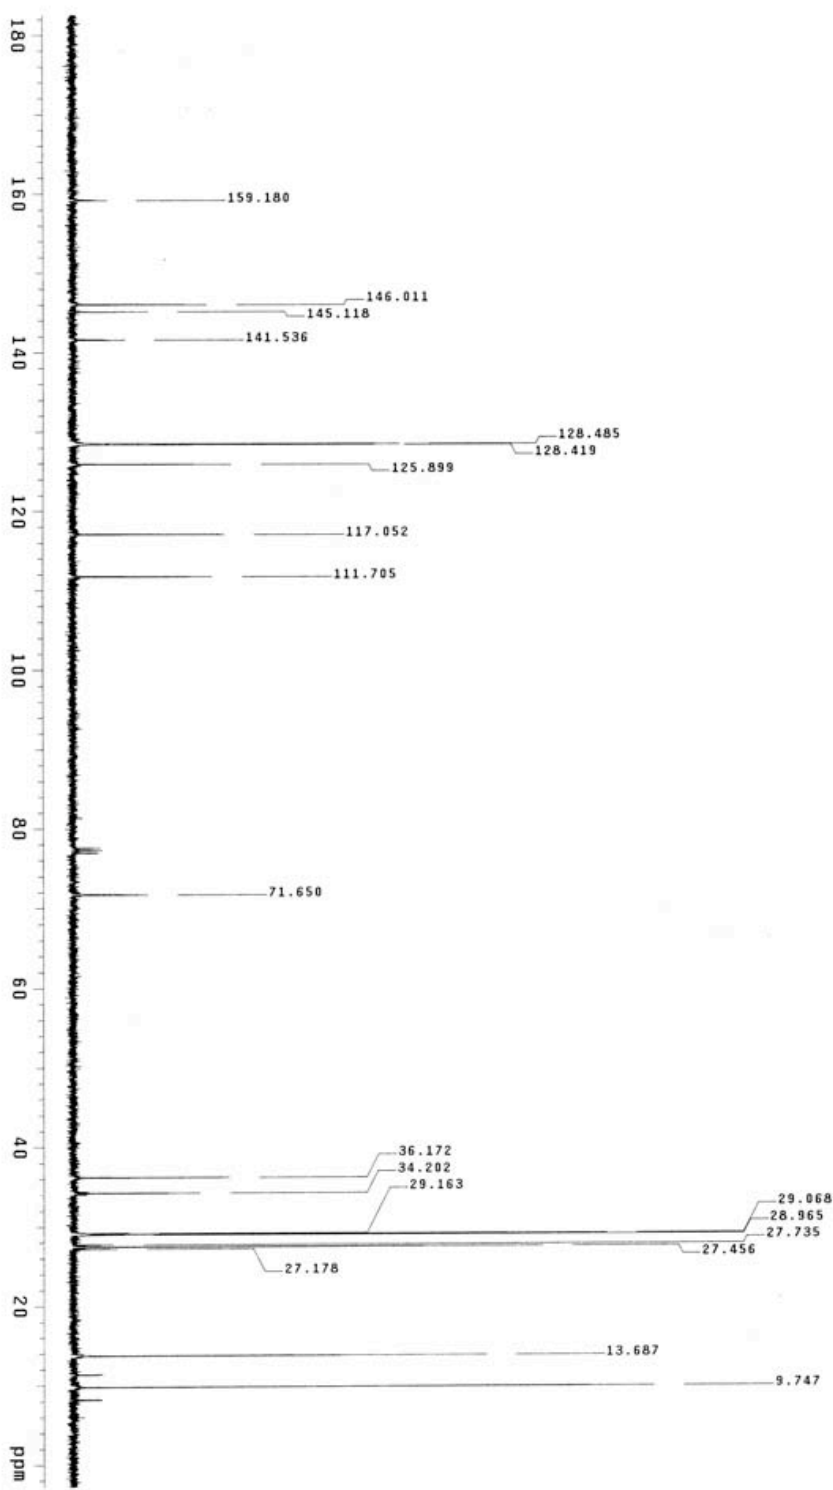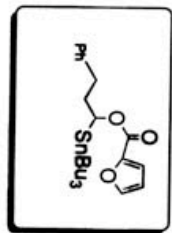



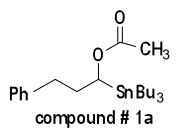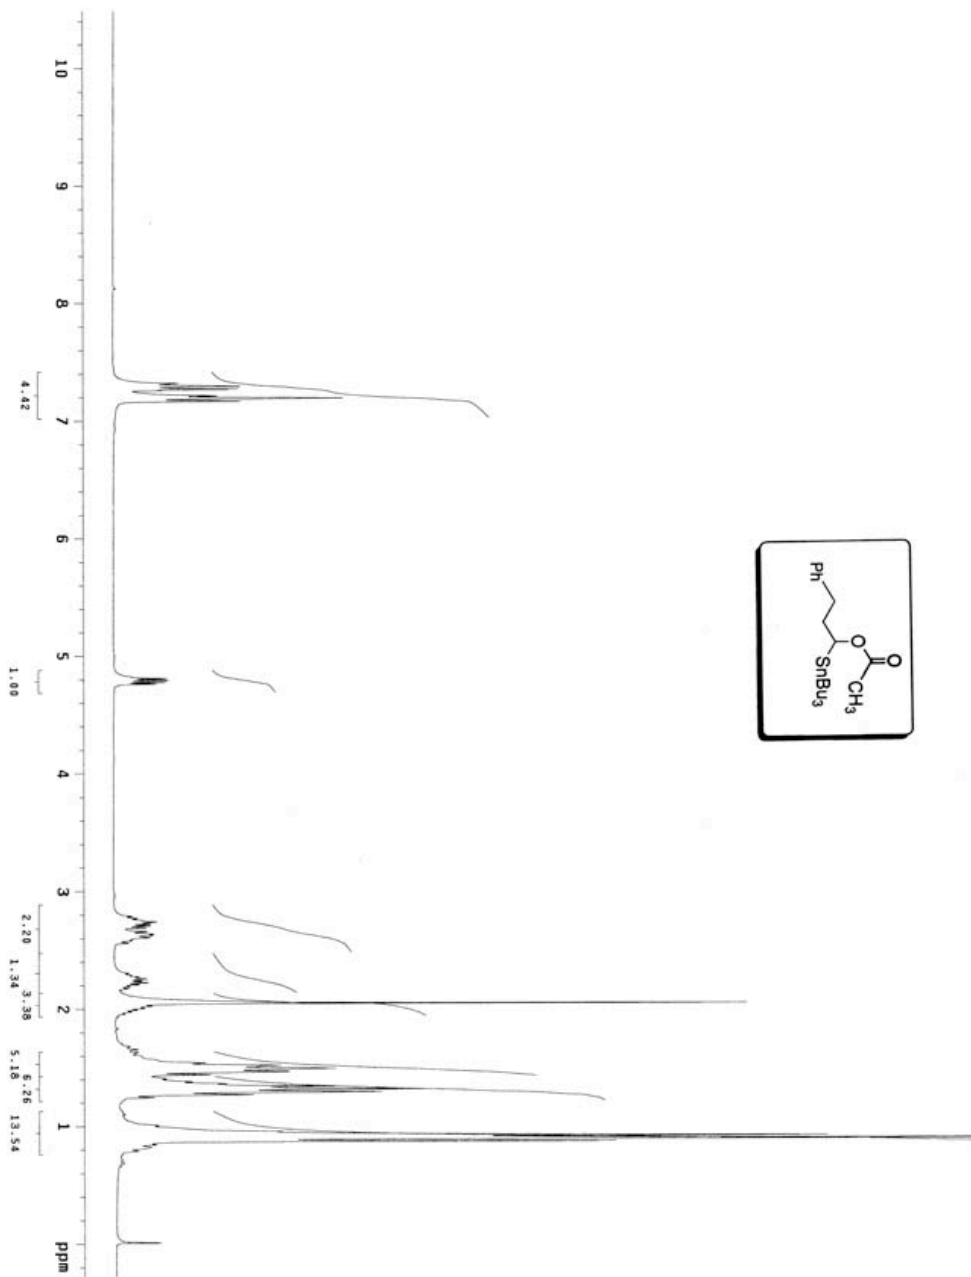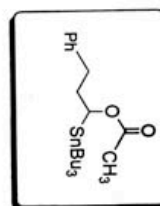

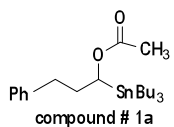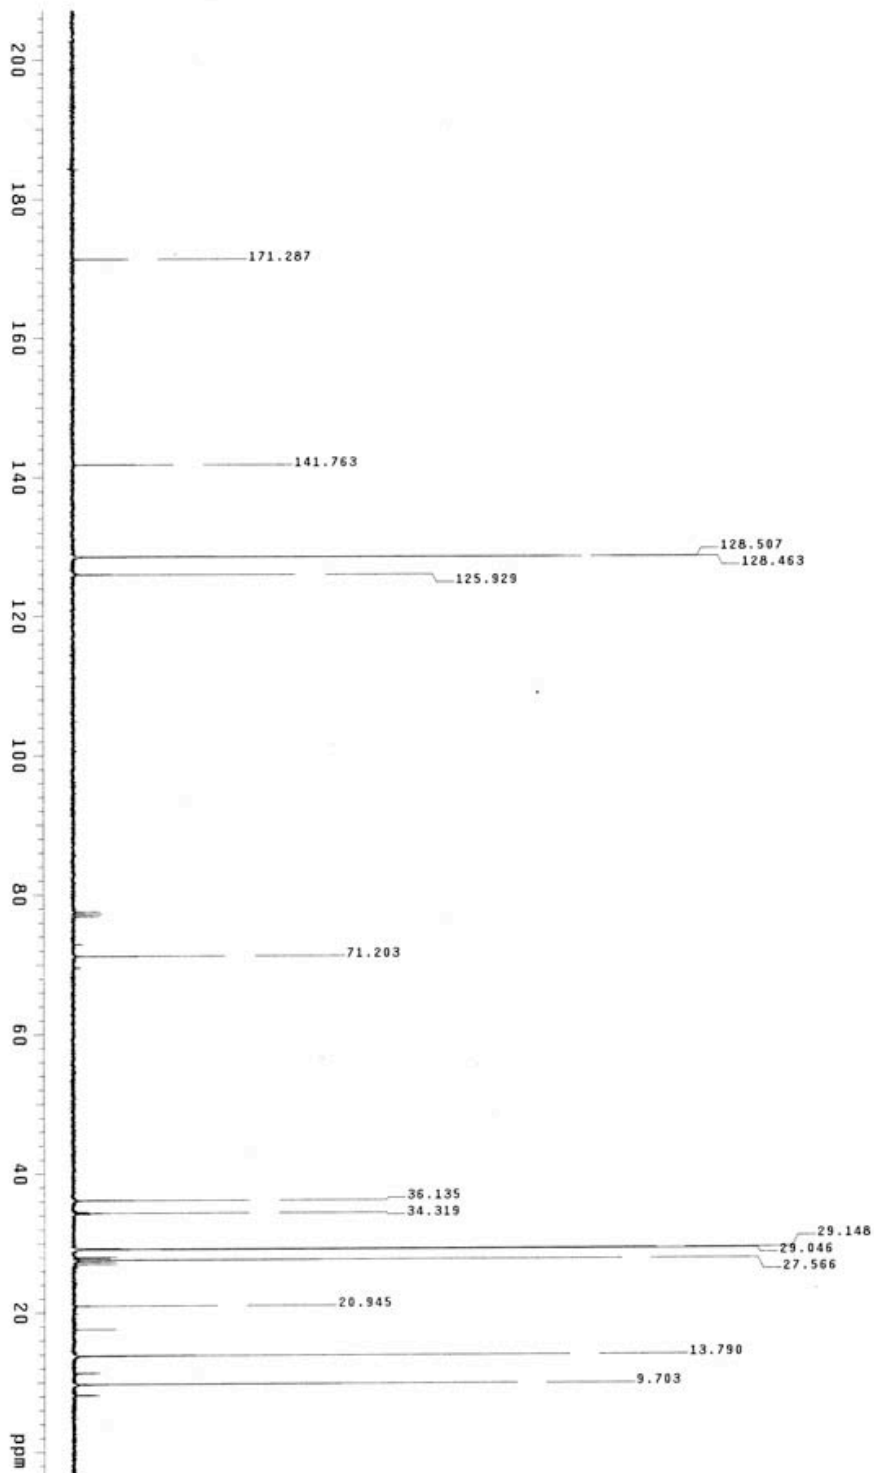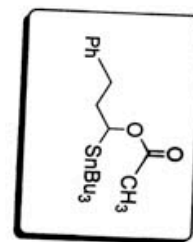

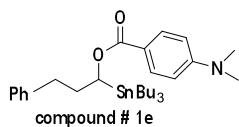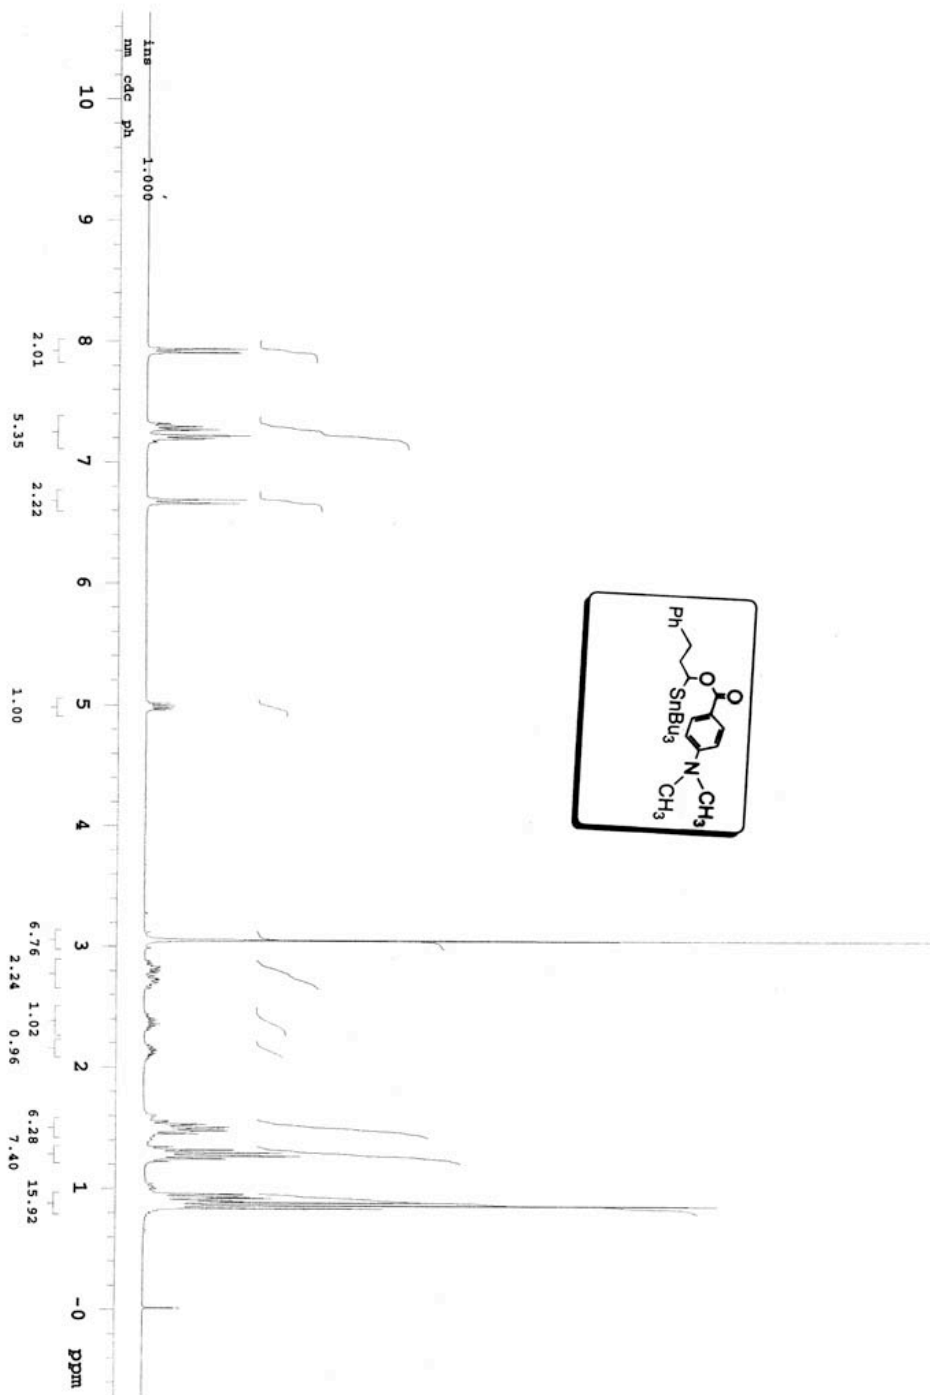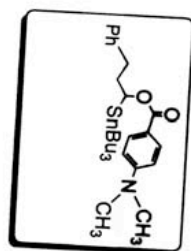

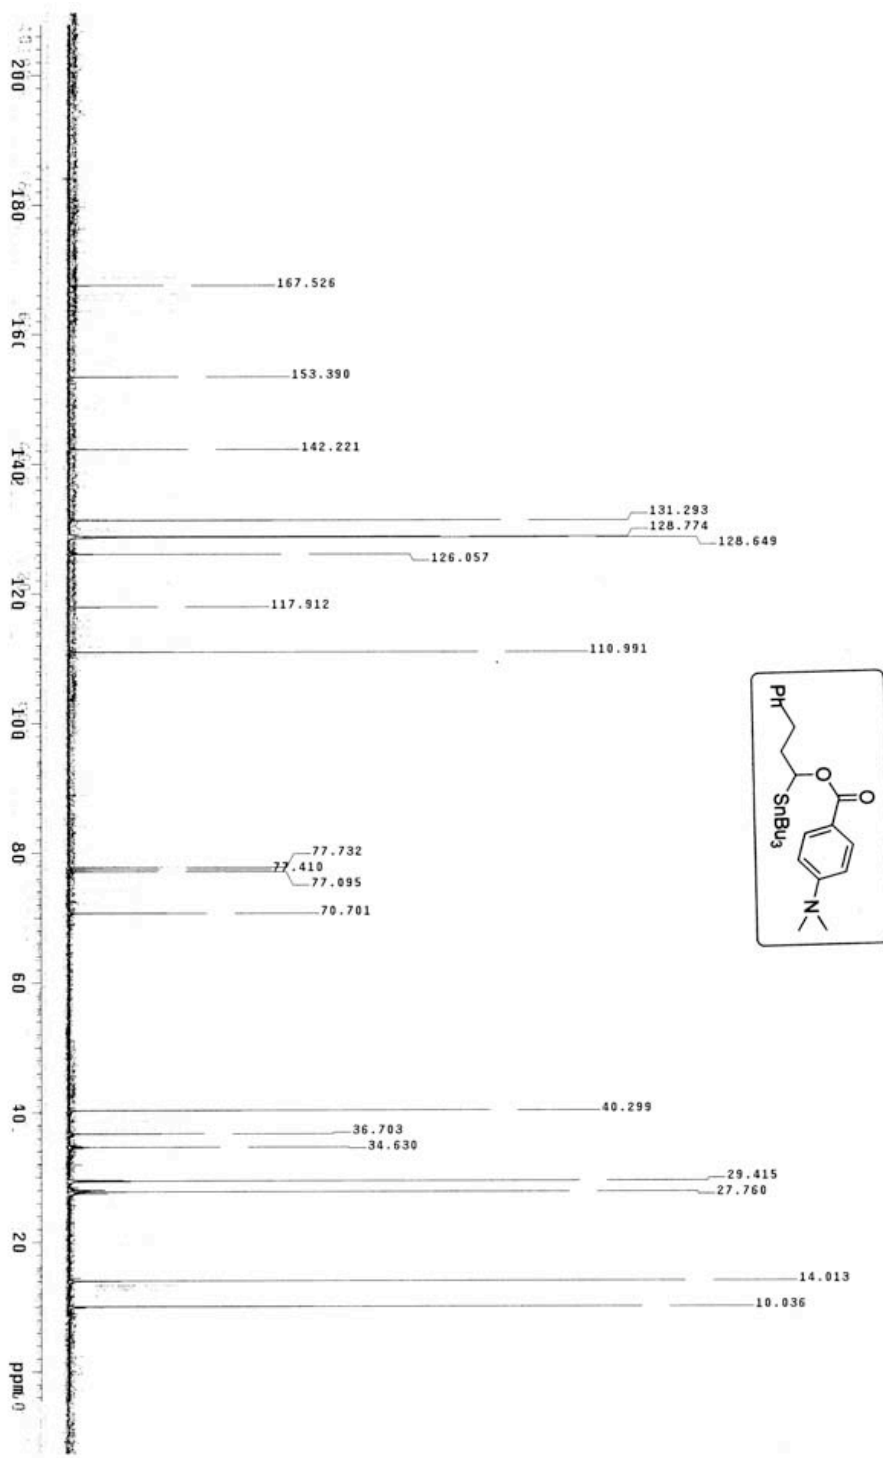

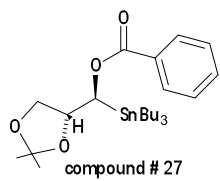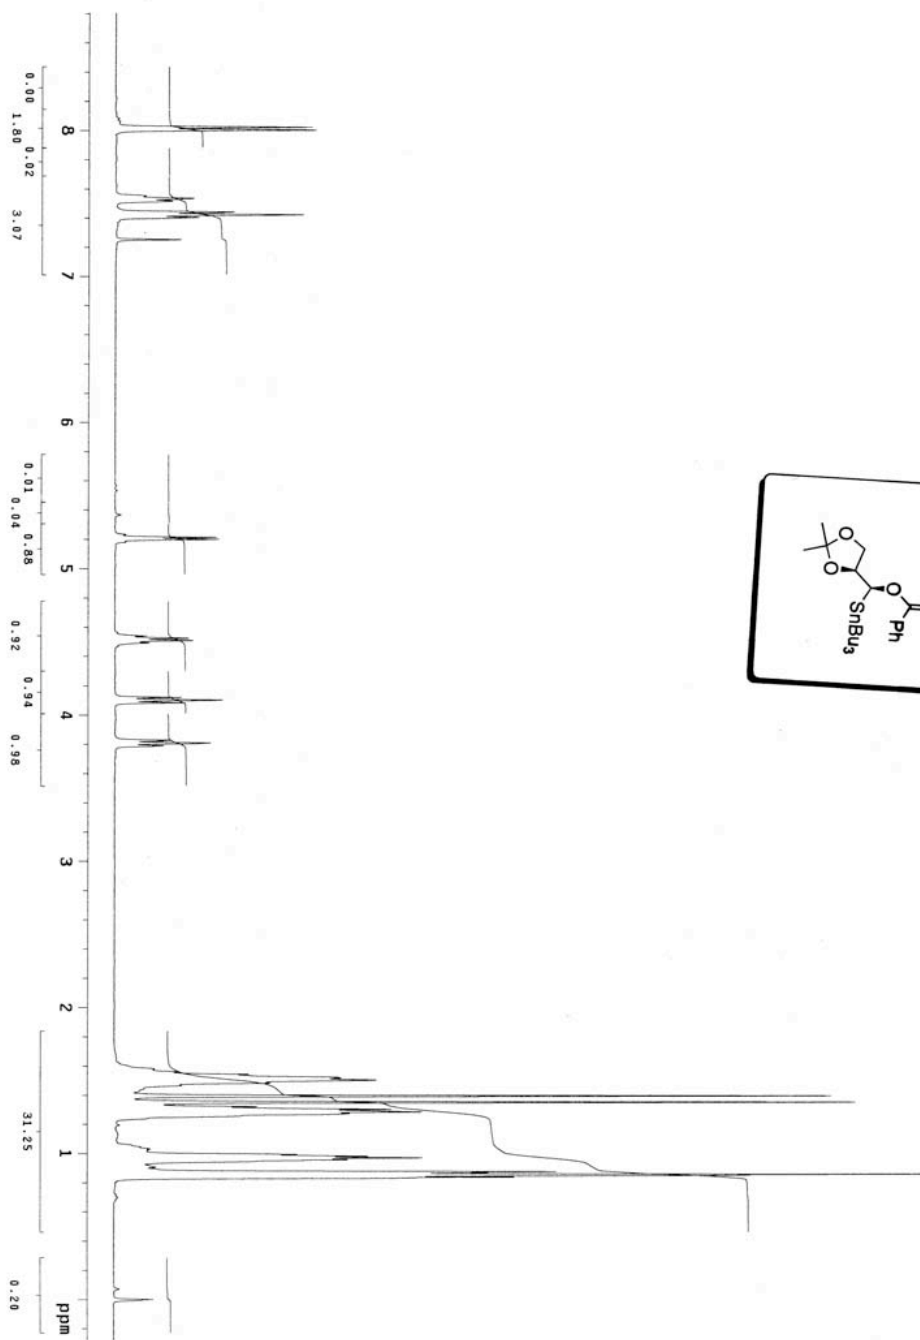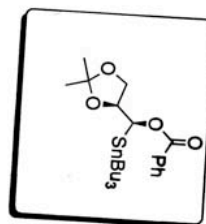

Supplement: NIHMS257807-supplement-2_si_002.pdf [file NIHMS257807-supplement-2_si_002.pdf]
