# Supplementary material
Source: PubMed Central journal article supplement (PMC3021624)
Supplement: NIHMS257807-supplement-1_si_001.pdf [file NIHMS257807-supplement-1_si_001.pdf]

*Supporting Information*

**Pd-Catalyzed Cross-Couplings of  $\alpha$ -(Acyloxy)-tri-*n*-butylstannanes with Alkenyl, Aryl and Heteroaryl Electrophiles**

Mohan Goli, Anyu He and J. R. Falck\*

*Departments of Biochemistry and Pharmacology, University of Texas Southwestern Medical Center, Dallas, Texas 75390 USA*

*E-mail: [j.falck@UTSouthwestern.edu](mailto:j.falck@UTSouthwestern.edu)*

|                                |           |
|--------------------------------|-----------|
| I. General Procedures          | S2 – S3   |
| II. Reaction Optimization      | S4 – S6   |
| III. Compound Characterization | S7 – S17  |
| IV. HPLC Chromatograms         | S17 – S21 |
| V. Literature                  | S21       |

**General Procedures.** All reactions were maintained under an argon atmosphere. Anhydrous solvents (THF, DME, benzene) were freshly distilled from sodium benzophenone ketyl or from CaH<sub>2</sub> (CH<sub>2</sub>Cl<sub>2</sub>, toluene) under argon. Unless otherwise noted, commercially available materials were used without further purification. Flash chromatography (FC) was performed using E. Merck silica gel 60 (240–400 mesh). Thin layer chromatography (TLC) was performed using pre-coated plates purchased from E. Merck (silica gel 60 PF254, 0.25 mm). NMR spectra were recorded in CDCl<sub>3</sub> on spectrometers at operating frequencies of 300/400/500 MHz (<sup>1</sup>H) or 75/100/125 MHz (<sup>13</sup>C) as indicated in the individual spectrum. Chemical shifts ( $\delta$ ) are given in ppm relative to residual solvent (usually chloroform  $\delta = 7.26$  for <sup>1</sup>H NMR or  $\delta = 77.23$  for proton decoupled <sup>13</sup>C NMR) and coupling constants (*J*) in Hz. Multiplicity is tabulated as s for singlet, d for doublet, t for triplet, q for quadruplet, and m for multiplet. Optical rotations were measured at room temperature and corrected to 20 °C on a Rudolph Research Analytical Autopol<sup>®</sup> IV polarimeter. LC/MS spectra were obtained with an Agilent 1200 series API-LC/MSD spectrometer. High resolution mass spectral analyses were kindly provided by Professor Kasem Nithipatikom at the Medical College of Wisconsin Mass Spectroscopy Facility. Enantiomeric excesses, expressed as % ee, were determined via HPLC with chiral columns as specified in the individual experimental descriptions and verified using appropriate racemic mixtures.

## Experimental

**Cross-Coupling Procedure using Iodo- or Triflate-electrophiles.** A Schlenk tube was charged with  $\alpha$ -(acyloxy)-tri-*n*-butylstannane (0.16 mmol), 1,2-bis(diphenylphosphino)ethane]dichloropalladium(II) (0.016 mmol, 10 mol%), and anhydrous THF (3 mL) and then degassed via four alternating high vacuum-argon cycles. The iodo- or triflate electrophile (0.24 mmol) in THF (2 mL) was added via syringe. After stirring under argon at 45 °C for 10 h, the reaction mixture was diluted with Et<sub>2</sub>O (10 mL) and filtered through a short pad of neutral alumina. The filter cake was washed with Et<sub>2</sub>O (2  $\times$  20 mL) and the combined organic filtrates were washed with water, brine,

and evaporated *in vacuo*. The residue was purified by silica gel chromatography or preparative TLC to furnish the adduct in the indicated yields.

**Cross-Coupling Procedure using Bromo-electrophiles.** Same procedure as above, except the 1,2-bis(diphenylphosphino)ethane]dichloropalladium(II) was replaced with the Buchwald catalyst chloro(2-di-*tert*-butylphosphino-2',4',6'-tri-*iso*-propyl-1,1'-biphenyl)[2-(2-aminoethyl)phenyl] palladium(II).

**Synthesis of  $\alpha$ -(Acyloxy)-tri-*n*-butylstannanes.** Acid chloride (6.30 mmol) in dry CH<sub>2</sub>Cl<sub>2</sub> (5 mL) was added slowly to a 0 °C solution of  $\alpha$ -(hydroxy)stannane<sup>1</sup> (4.70 mmol), triethylamine (1.2 g, 0.0118 mmol) and a catalytic amount of DMAP in dry CH<sub>2</sub>Cl<sub>2</sub> (15 mL). After stirring at room temperature for 6-7 h, the reaction mixture was washed with water (20 mL). The aqueous phase was back-extracted with CH<sub>2</sub>Cl<sub>2</sub> (2  $\times$  50 mL) and the combined extracts were washed with water (2  $\times$  20 mL), brine (20 mL), dried over Na<sub>2</sub>SO<sub>4</sub> and concentrated to dryness. The residue was purified by SiO<sub>2</sub> chromatography (70-230 mesh) eluting with 2-5% EtOAc/hexane to gave the  $\alpha$ -(acyloxy)-tri-*n*-butylstannane as a colorless oil.

**Reagents.** Iodide **4**<sup>2</sup>, 2-halo-2-cyclohexen-1-one **6/7**,<sup>3</sup> **9/10**,<sup>4</sup> triflate **12**,<sup>5</sup> vinyl iodide **15**,<sup>6</sup> and 6-halo-indole **17/18**<sup>7</sup> were prepared according to literature procedures. Stannyl diastereomers and enantiomers were prepared as previous described.<sup>1</sup> All other reagents were commercial and used as received.

## Reaction Optimization

**Table A.** Representative Thione-Derivatives.

| entry | R | catalyst                                    | temp (°C) | A yield (%) | B yield (%) |
|-------|---|---------------------------------------------|-----------|-------------|-------------|
| 1     |   | CuTC                                        | 60        | 0           | 0           |
| 2     |   | CuI                                         | 80        | 15          | 0           |
| 3     |   | CuTC                                        | 65        | 0           | 0           |
| 4     |   | CuI                                         | 85        | 0           | 0           |
| 5     |   | CuTC                                        | 25        | 35          | 55          |
| 6     |   | CuTC                                        | 25        | 23          | 10          |
| 7     |   | CuI                                         | 65        | 0           | 0           |
| 8     |   | CuTC/<br>Pd <sub>2</sub> (dba) <sub>3</sub> | 70        | 0           | 0           |
| 9     |   | CuTC/<br>Pd(PPh <sub>3</sub> ) <sub>4</sub> | 70        | 0           | 0           |
| 10    |   | Pd(dppe)Cl <sub>2</sub>                     | 45        | 30          | 50          |
| 11    |   | Pd(dppe)Cl <sub>2</sub>                     | 45        | 25          | 38          |
| 12    |   | Pd(dppe)Cl <sub>2</sub>                     | 45        | 10          | 30          |
| 13    |   | Pd(dppe)Cl <sub>2</sub>                     | 60        | 0           | 0           |
| 14    |   | Pd(dppe)Cl <sub>2</sub>                     | 60        | 0           | 0           |
| 15    |   | Pd(dppe)Cl <sub>2</sub>                     | 45        | 25          | 10          |
| 16    |   | Pd(dppe)Cl <sub>2</sub>                     | 60        | 0           | 0           |

**Table B.** Selected Misc. *O*-Derivatives.

| entry | R | catalyst                                     | temp (°C) | yield (%) |
|-------|---|----------------------------------------------|-----------|-----------|
| 1     |   | Pd(dppe)Cl <sub>2</sub>                      | 45        | 28        |
| 2     |   | Pd(PPh <sub>3</sub> ) <sub>4</sub>           | 65        | 15        |
| 3     |   | Pd(CH <sub>3</sub> CN)Cl <sub>2</sub>        | 65        | 0         |
| 4     |   | Pd( <i>t</i> Bu <sub>3</sub> P) <sub>2</sub> | 65        | 0         |
| 5     |   | Pd(dppe)Cl <sub>2</sub>                      | 70        | 0         |
| 6     |   | Pd(dppe)Cl <sub>2</sub>                      | 70        | 0         |
| 7     |   | Pd(dppe)Cl <sub>2</sub>                      | 70        | 0         |
| 8     |   | Pd(dppe)Cl <sub>2</sub>                      | 70        | 0         |
| 9     |   | Pd(dppe)Cl <sub>2</sub>                      | 70        | 0         |
| 10    |   | Pd(dppe)Cl <sub>2</sub>                      | 70        | 0         |
| 11    |   | Pd(dppe)Cl <sub>2</sub>                      | 70        | 10        |
| 12    |   | Pd(dppe)Cl <sub>2</sub>                      | 70        | 0         |
| 13    |   | Pd(dppe)Cl <sub>2</sub>                      | 70        | 0         |

**Table C. Pd Catalyst Survey<sup>a,b</sup>**

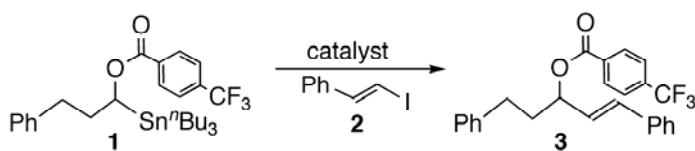

| entry | catalyst                                                                                                                                                    | yield (%) |
|-------|-------------------------------------------------------------------------------------------------------------------------------------------------------------|-----------|
| 1     | Pd(acetonitrile)tetrafluoroborate                                                                                                                           | 35        |
| 2     | Pd(dppf) <sub>2</sub> Cl <sub>2</sub>                                                                                                                       | 10        |
| 3     | Diisopropyl(phenylimidazol-2-ylidene-3-chloropyridyl)Pd(II)Cl <sub>2</sub>                                                                                  | 5         |
| 4     | Pd(0)(dppf)                                                                                                                                                 | 5         |
| 5     | Chloro(di-2-norbornyl phosphino(dimethylamino-1,1-biphenyl)Pd(II)                                                                                           | 0         |
| 6     | Tris(dibenzylideneacetone)Pd(0)                                                                                                                             | 5         |
| 7     | Pd(PPh <sub>3</sub> ) <sub>4</sub>                                                                                                                          | 15        |
| 8     | Pd(MeCN) <sub>2</sub> Cl <sub>2</sub>                                                                                                                       | 4         |
| 9     | Bis(di-( <i>tert</i> -butyl)(N,N-dimethylphenyl)phosphine)palladium(II) chloride                                                                            | 2         |
| 10    | PdCl <sub>2</sub> [PtBu <sub>2</sub> (4-CF <sub>3</sub> -Ph)] <sub>2</sub>                                                                                  | 18        |
| 11    | Allyl[1,3-bis(2,6-diisopropylphenyl)imidazol-2-ylidene]chloropalladium(II)                                                                                  | 10        |
| 12    | 1,1-Bis(di-cyclohexylphosphino)ferrocene palladium dichloride                                                                                               | 15        |
| 13    | Bis(di-( <i>tert</i> -butyl)(4-trifluoromethylphenyl)phosphine)palladium(II) chloride                                                                       | 5         |
| 14    | {[P( <i>t</i> -Bu) <sub>3</sub> ]PdBr} <sub>2</sub>                                                                                                         | 3         |
| 15    | Bis(tricyclohexylphosphine)Pd(II)                                                                                                                           | 10        |
| 16    | Chloro(2-di- <i>tert</i> -butylphosphino-2',4',6'-tri- <i>iso</i> -propyl-1,1'-biphenyl)[2-(2-aminoethyl)phenyl]palladium(II)                               | 65        |
| 17    | Chloro(2-dicyclohexylphosphino-2',6'-dimethoxy-1,1'-biphenyl)[2-(2-aminoethyl)phenyl]palladium(II) methyl- <i>tert</i> -butyl ether adduct                  | 20        |
| 18    | Chloro[2-(dicyclohexylphosphino)-3,6-dimethoxy-2',4',6'-tri- <i>iso</i> -propyl-1,1'-biphenyl][2-(2-aminoethyl)phenyl]palladium(II)                         | 10        |
| 19    | Chloro(2-dicyclohexylphosphino-2',6'-di- <i>iso</i> -propoxy-1,1'-biphenyl)[2-(2-aminoethyl)phenyl]palladium(II), methyl- <i>tert</i> -butyl ether adduct   | 15        |
| 20    | Chloro(2-dicyclohexylphosphino-2',4',6'-tri- <i>iso</i> -propyl-1,1'-biphenyl)[2-(2-aminoethyl)phenyl]palladium(II) methyl- <i>tert</i> -butyl ether adduct | 15        |
| 21    | Bis(dibenzonitrile)Pd Cl <sub>2</sub>                                                                                                                       | 10        |
| 22    | tris(dibenzylideneacetone)dipalladium                                                                                                                       | 10        |
| 23    | PdCl <sub>2</sub>                                                                                                                                           | 0         |
| 24    | Pd(dba) <sub>3</sub>                                                                                                                                        | 24        |
| 25    | Di-bromo-bis(tri- <i>tert</i> -butylphosphine)Pd(II)                                                                                                        | 5         |
| 26    | Bis[(tri- <i>tert</i> -butyl)(4-trifluoromethyl)phosphine]Pd(II) Cl <sub>2</sub>                                                                            | 5         |
| 27    | Diisopropyl(phenylimidazol-2-ylidene-3-chloropyridyl)Pd(II)                                                                                                 | 10        |
| 28    | Chloro(di-2-norbornylphosphino(dimethylamino-1,1-biphenyl)Pd(II)                                                                                            | 15        |
| 29    | Bi(diphenylphosphino)ferrocenePdCl <sub>2</sub>                                                                                                             | 30        |
| 30    | 1,1'-bis(di- <i>tert</i> -butylphosphino)ferrocene Pd(II) Cl <sub>2</sub>                                                                                   | 15        |
| 31    | Pd(II) acetate                                                                                                                                              | 10        |
| 32    | Bis(benzonitrile)Pd(II) Cl <sub>2</sub>                                                                                                                     | 5         |
| 33    | Bis(triethylphosphine)Pd(II) Cl <sub>2</sub>                                                                                                                | 10        |
| 34    | Pd(PPh <sub>3</sub> ) <sub>2</sub> Cl <sub>2</sub>                                                                                                          | 5         |
| 35    | Bis(dibenzylideneacetone)dipalladium                                                                                                                        | 10        |

<sup>a</sup>Reaction conditions:  $\alpha$ -(acyloxy)stannane **1** (1 equiv), **2** (1.5 equiv), Pd catalyst (10 mol%), THF, 45 °C, 8-12 h. <sup>b</sup>Equivalent reactions conducted with CuI, CuCN, and CuTC alone or in combination with the Pd catalysts offered no advantages in yields or reaction rates.

## Compound Characterization

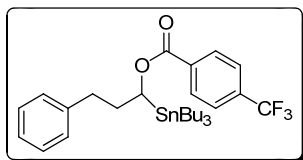

**3-Phenyl-1-(tri-*n*-butylstannyl)propyl 4-(trifluoromethyl)benzoate.**  $^1\text{H}$  NMR (400 MHz,  $\text{CDCl}_3$ )  $\delta$  8.10 (d,  $J = 8$  Hz, 2H), 7.70 (d,  $J = 8$  Hz, 2H), 7.29-7.18 (m, 5H), 5.13-5.08 (m, 1H), 2.82-2.77 (m, 1H), 2.61-2.69 (m, 1H), 2.43-2.38 (m, 1H), 2.18-2.13 (m, 1H), 1.53-1.46 (m, 6H), 1.28-1.24 (m, 7H), 0.93-0.82 (m, 14H);  $^{13}\text{C}$  NMR (100 MHz,  $\text{CDCl}_3$ )  $\delta$  165.4, 141.3, 134.1, 134.0, 129.8, 128.5, 126.0, 125.3, 125.2, 72.6, 36.1, 34.5, 29.2, 29.0, 27.9, 27.8, 27.5, 27.2, 26.9, 13.6, 9.8.

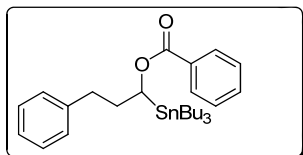

**3-Phenyl-1-(tri-*n*-butylstannyl)propyl benzoate.**  $^1\text{H}$  NMR (400 MHz,  $\text{CDCl}_3$ )  $\delta$  8.01 (d,  $J = 8$  Hz, 2H), 7.56-7.16 (m, 8H), 5.07-5.04 (m, 1H), 2.85-2.81 (m, 1H), 2.80-2.67 (m, 1H), 2.41-2.34 (m, 1H), 2.16-2.10 (m, 1H), 1.53-1.44 (m, 6H), 1.29-1.23 (m, 7H), 0.94-0.82 (m, 14H);  $^{13}\text{C}$  NMR (100 MHz,  $\text{CDCl}_3$ )  $\delta$  166.9, 141.9, 132.7, 130.8, 129.5, 128.7, 128.6, 128.5, 128.4, 126.0, 71.8, 36.4, 34.5, 34.3, 29.3, 29.2, 29.1, 27.9, 27.8, 127.6, 27.5, 27.3, 13.8, 9.7.

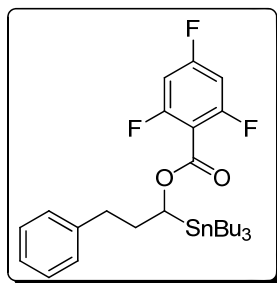

**3-Phenyl-1-(tri-*n*-butylstannyl)propyl 2,4,6-trifluorobenzoate.**  $^1\text{H}$  NMR (400 MHz,  $\text{CDCl}_3$ )  $\delta$  7.32-7.27 (m, 5H), 6.75 (t,  $J = 6$  Hz, 2H), 5.13-5.10 (m, 1H), 2.86-2.78 (m, 1H), 2.69-2.62 (m, 1H), 2.37-2.33 (m, 1H), 2.11-2.07 (m, 1H), 1.52-1.49 (m, 6H), 1.33-1.28 (m, 7H), 0.90-0.87 (m, 14H);  $^{13}\text{C}$  NMR (100 MHz,  $\text{CDCl}_3$ )  $\delta$  161.0, 141.6, 134.0,

128.6, 128.5, 126.0, 101.3, 101.2, 101.0, 77.4, 36.2, 34.2, 29.2, 29.1, 29.06, 27.5, 27.3, 27.1, 13.7, 9.6.

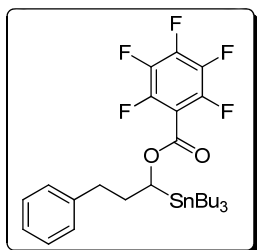

**3-Phenyl-1-(tri-*n*-butylstannyl)propyl 2,3,4,5,6-pentafluorobenzoate.**  $^1\text{H}$  NMR (400 MHz,  $\text{CDCl}_3$ )  $\delta$  7.30-7.16 (m, 5H), 5.16-5.13 (m, 1H), 2.83-2.76 (m, 1H), 2.67-2.61 (m, 1H), 2.35-2.32 (m, 1H), 2.09-2.04 (m, 1H), 1.53-1.44 (m, 6H), 1.31-1.25 (m, 7H), 0.96-0.84 (m, 14H);  $^{13}\text{C}$  NMR (100 MHz,  $\text{CDCl}_3$ )  $\delta$  159.2, 141.4, 128.6, 128.5, 126.1, 74.6, 36.2, 34.2, 29.3, 29.2, 29.1, 27.6, 27.3, 27.2, 13.7, 9.7.

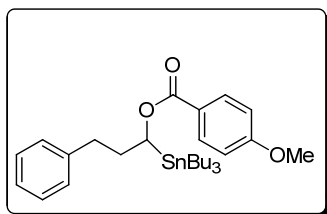

**3-Phenyl-1-(tri-*n*-butylstannyl)propyl 4-methoxybenzoate.**  $^1\text{H}$  NMR (400 MHz,  $\text{CDCl}_3$ )  $\delta$  8.10 (d,  $J = 8$  Hz, 2H), 7.27-7.17 (m, 5H), 6.82 (d,  $J = 8$  Hz, 2H), 5.12-5.06 (m, 1H), 2.81-2.73 (m, 1H), 2.61-2.65 (m, 1H), 2.42-2.33 (m, 1H), 2.15-2.12 (m, 1H), 1.54-1.49 (m, 6H), 1.42-1.26 (m, 7H), 0.93-0.82 (m, 14H);  $^{13}\text{C}$  NMR (100 MHz,  $\text{CDCl}_3$ )  $\delta$  166.6, 163.5, 141.8, 131.4, 128.5, 128.4, 125.9, 123.2, 113.6, 71.3, 55.4, 36.3, 34.4, 29.3, 29.2, 27.8, 27.5, 27.3, 27.2, 13.8, 8.3.

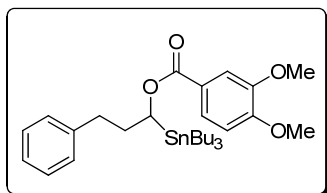

**3-Phenyl-1-(tri-*n*-butylstannyl)propyl 3,4-dimethoxybenzoate.**  $^1\text{H}$  NMR (400 MHz,  $\text{CDCl}_3$ )  $\delta$  8.10 (d,  $J = 8$  Hz, 1H), 7.29-7.16 (m, 5H), 6.52-6.42 (m, 2H), 4.97-4.94 (m, 1H), 3.87 (s, 3H), 3.84 (s, 3H), 2.80-2.71 (m, 1H), 2.69-2.66 (m, 1H), 2.35-2.29 (m, 1H),



2.13-2.05 (m, 1H), 1.56-1.46 (m, 6H), 1.29-1.24 (m, 7H), 0.95-0.82 (m, 14H);  $^{13}\text{C}$  NMR (100 MHz,  $\text{CDCl}_3$ )  $\delta$  166.3, 163.9, 161.0, 141.1, 133.5, 128.5, 128.4, 125.8, 113.3, 104.4, 99.0, 71.1, 55.9, 55.4, 36.4, 34.4, 29.1, 29.0, 27.6, 27.5, 13.8, 9.7.

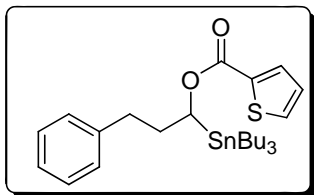

**3-Phenyl-1-(tri-*n*-butylstannyl)propyl thiophene-2-carboxylate.**  $^1\text{H}$  NMR (400 MHz,  $\text{CDCl}_3$ )  $\delta$  7.82 (d,  $J = 1.2$  Hz, 1H), 7.48 (d,  $J = 1.2$  Hz, 1H), 7.38-7.04 (m, 6H), 5.04-5.00 (m, 1H), 2.81-2.70 (m, 1H), 2.71-2.67 (m, 1H), 2.36-2.23 (m, 1H), 2.12-2.08 (m, 1H), 1.52-1.43 (m, 6H), 1.29-1.23 (m, 7H), 0.94-0.82 (m, 14H);  $^{13}\text{C}$  NMR (100 MHz,  $\text{CDCl}_3$ )  $\delta$  162.5, 141.5, 134.3, 132.8, 131.8, 128.5, 127.7, 125.9, 71.9, 36.2, 34.2, 29.2, 29.1, 29.0, 27.8, 27.5, 13.7, 9.8.

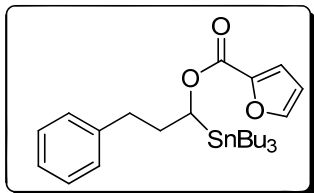

**3-Phenyl-1-(tri-*n*-butylstannyl)propyl furan-2-carboxylate.**  $^1\text{H}$  NMR (400 MHz,  $\text{CDCl}_3$ )  $\delta$  7.56 (d,  $J = 1.6$  Hz, 1H), 7.38-7.04 (m, 6H), 6.50 (dd  $J = 1.2, 3.2$  Hz, 1H), 5.05-5.00 (m, 1H), 2.82-2.71 (m, 1H), 2.73-2.66 (m, 1H), 2.34-2.21 (m, 1H), 2.13-2.06 (m, 1H), 1.50-1.45 (m, 6H), 1.30-1.23 (m, 7H), 0.94-0.82 (m, 14H);  $^{13}\text{C}$  NMR (100 MHz,  $\text{CDCl}_3$ )  $\delta$  159.1, 146.0, 145.1, 141.5, 128.5, 128.4, 125.8, 117.0, 111.7, 71.6, 36.1, 34.2, 29.1, 29.0, 28.9, 27.7, 27.4, 13.6, 9.7.

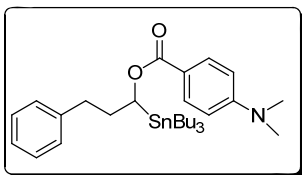

**3-Phenyl-1-(tri-*n*-butylstannyl)propyl 4-(dimethylamino)benzoate.**  $^1\text{H}$  NMR (400 MHz,  $\text{CDCl}_3$ )  $\delta$  7.92 (d,  $J = 9.6$  Hz, 1H), 7.31-7.19 (m, 5H), 6.80 (d,  $J = 9.6$  Hz, 1H), 5.00-5.95 (m, 1H), 3.05 (s, 6H), 2.87-2.79 (m, 1H), 2.77-2.69 (m, 1H), 2.35-2.22 (m,

1H), 2.12-2.06 (m, 1H), 154-1.45 (m, 6H), 1.31-1.24 (m, 7H), 0.95-0.83 (m, 14H); <sup>13</sup>C NMR (100 MHz, CDCl<sub>3</sub>) δ 167.5, 153.3, 142.2, 131.2, 128.7, 126.5, 117.9, 110.7, 70.7, 41.2, 40.2, 36.7, 34.6, 29.4, 27.7, 14.0, 10.0.

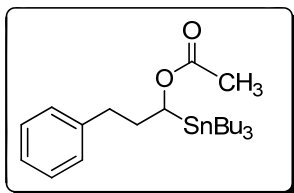

**3-Phenyl-1-(tri-*n*-butylstannyl)propyl acetate.** <sup>1</sup>H NMR (400 MHz, CDCl<sub>3</sub>) δ 7.32-7.17 (m, 5H), 4.80-4.76 (m, 1H), 2.76-2.70 (m, 1H), 2.68-2.60 (m, 1H), 2.27-2.20 (m, 1H), 2.04 (s, 3H), 2.02-2.00 (m, 1H), 1.51-1.46 (m, 6H), 1.34-1.26 (m, 7H), 0.95-0.87 (m, 14H); <sup>13</sup>C NMR (100 MHz, CDCl<sub>3</sub>) δ 171.2, 141.7, 128.5, 128.4, 125.9, 71.2, 36.1, 34.3, 29.1, 29.0, 20.9, 27.6, 27.4, 13.7, 9.7.

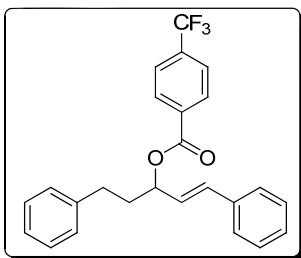

**(*E*)-1,5-Diphenylpent-1-en-3-yl-4-(trifluoromethyl)benzoate.** <sup>1</sup>H NMR (400 MHz, CDCl<sub>3</sub>) δ 8.15 (d, *J* = 8 Hz, 2H), 7.71 (d, *J* = 8 Hz, 2H), 7.39 (d, *J* = 8, 2H), 7.33-7.26 (m, 6H), 7.25 (d, *J* = 8 Hz, 2H), 6.72 (d, *J* = 16 Hz, 1H), 6.29 (dd, *J* = 16, 7 Hz, 1H), 5.72-5.56 (m, 1H), 2.79-2.75 (m, 2H), 2.30-2.25 (m, 1H), 2.20-2.13 (m, 1H); <sup>13</sup>C NMR (100 MHz, CDCl<sub>3</sub>) δ 164.8, 141.2, 136.2, 133.9, 133.7, 130.2, 128.8, 128.7, 128.5, 128.3, 127.0, 126.8, 126.3, 125.7, 125.6, 125.5, 75.8, 36.3, 31.8. HRMS calcd for C<sub>25</sub>H<sub>22</sub>F<sub>3</sub>O<sub>2</sub> [M+1]<sup>+</sup> 411.1572, found 411.1574.

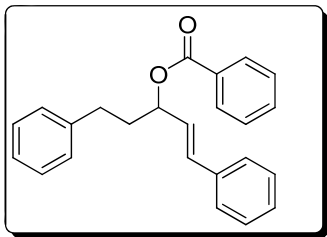

**(E)-1,5-Diphenylpent-1-en-3-yl-benzoate.**  $^1\text{H}$  NMR (400 MHz,  $\text{CDCl}_3$ )  $\delta$  8.09 (d,  $J = 8$  Hz, 2H), 7.57-7.38 (m, 3H), 7.33-7.20 (m, 10H), 6.73 (d,  $J = 16$  Hz, 1H), 6.30 (dd,  $J = 16, 7$  Hz, 1H), 5.72-5.68 (m, 1H), 2.81-2.76 (m, 2H), 2.29-2.22 (m, 1H), 2.19-2.12 (m, 1H);  $^{13}\text{C}$  NMR (100 MHz,  $\text{CDCl}_3$ )  $\delta$  184.3, 141.4, 136.4, 133.2, 133.1, 129.8, 128.8, 128.7, 128.6, 128.5, 128.2, 127.5, 126.8, 126.2, 75.0, 36.5, 31.8. HRMS calcd for  $\text{C}_{24}\text{H}_{23}\text{O}_2$   $[\text{M}+1]^+$  343.1698, found 343.1699.

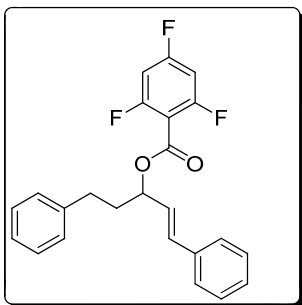

**(E)-1,5-Diphenylpent-1-en-3-yl-2,4,6-trifluorobenzoate.**  $^1\text{H}$  NMR (400 MHz,  $\text{CDCl}_3$ )  $\delta$  7.40-7.20 (m, 10H), 6.78-6.75 (m, 2H), 6.74 (d,  $J = 16$  Hz, 1H), 6.24 (dd,  $J = 16, 7$  Hz, 1H), 5.71-5.68 (m, 1H), 2.82-2.74 (m, 2H), 2.22-2.21 (m, 1H), 2.10-2.04 (m, 1H);  $^{13}\text{C}$  NMR (100 MHz,  $\text{CDCl}_3$ )  $\delta$  162.3, 141.2, 136.3, 133.7, 128.8, 128.7, 128.6, 128.5, 128.3, 126.9, 126.7, 126.6, 126.3, 126.2, 101.5, 101.3, 101.1, 76.5, 36.4, 31.5. HRMS calcd for  $\text{C}_{24}\text{H}_{20}\text{F}_3\text{O}_2$   $[\text{M}+1]^+$  397.1415, found 397.1415.

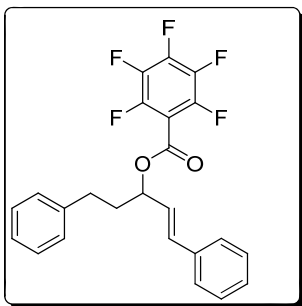

**(E)-1,5-Diphenylpent-1-en-3-yl-2, 3, 4, 5-pentafluorobenzoate.**  $^1\text{H}$  NMR (400 MHz,  $\text{CDCl}_3$ )  $\delta$  7.39-7.17 (m, 10H), 6.75 (d,  $J = 16$  Hz, 1H), 6.21 (dd,  $J = 16, 8$  Hz, 1H), 5.71-5.66 (m, 1H), 2.78-2.73 (m, 2H), 2.23-2.19 (m, 1H), 2.13-2.05 (m, 1H);  $^{13}\text{C}$  NMR (100 MHz,  $\text{CDCl}_3$ )  $\delta$  161.1, 141.0, 134.4, 128.8, 128.7, 128.6, 128.5, 126.9, 126.6, 126.4, 126.0, 66.5, 36.3, 31.5. HRMS calcd for  $\text{C}_{24}\text{H}_{18}\text{F}_5\text{O}_2$   $[\text{M}+1]^+$  433.1227, found 433.1224.

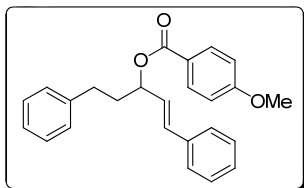

**(E)-1,5-Diphenylpent-1-en-3-yl-4-methoxybenzoate.**  $^1\text{H}$  NMR (400 MHz,  $\text{CDCl}_3$ )  $\delta$  8.03 (d,  $J = 8$  Hz, 2H), 7.37-7.20 (m, 10H), 6.94 (d,  $J = 8$  Hz, 2H), 6.72 (d,  $J = 16$ , 1H), 6.26 (dd,  $J = 16, 7$  Hz, 1H) 5.70-5.62 (m, 1H), 3.85 (s, 3H), 2.80-2.75 (m, 2H), 2.29-2.21 (m, 1H), 2.16-2.11 (m, 1H);  $^{13}\text{C}$  NMR (100 MHz,  $\text{CDCl}_3$ )  $\delta$  165.8, 141.6, 132.8, 131.9, 128.8, 128.7, 128.6, 128.1, 127.8, 126.8, 126.2, 113.8, 74.6, 55.7, 36.6, 31.8. HRMS calcd for  $\text{C}_{25}\text{H}_{25}\text{O}_3$   $[\text{M}+1]^+$  373.1804, found 373.1801.

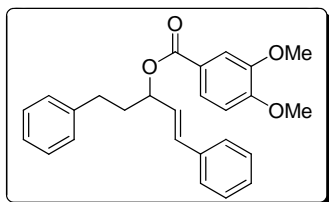

**(E)-1,5-Diphenylpent-1-en-3-yl-3, 4-dimethoxybenzoate.**  $^1\text{H}$  NMR (400 MHz,  $\text{CDCl}_3$ )  $\delta$  7.87 (d,  $J = 9$  Hz, 1H), 7.38-7.19 (m, 10H), 6.72 (d,  $J = 16$  Hz, 1H), 6.51-6.48 (m, 2H), 6.26 (dd,  $J = 16, 7$  Hz, 1H), 5.69-5.65 (m, 1H), 3.89 (s, 3H), 3.85 (s, 3H), 2.83-2.75 (m, 1H) 2.24-2.16 (m, 1H), 2.12-2.06 (m, 1H);  $^{13}\text{C}$  NMR (100 MHz,  $\text{CDCl}_3$ )  $\delta$  164.4, 141.8, 136.9, 136.7, 133.9, 132.6, 128.7, 128.6, 128.5, 128.2, 128.0, 126.8, 126.1, 104.7, 99.1, 74.2, 56.1, 55.7, 36.6, 31.79. HRMS calcd for  $\text{C}_{26}\text{H}_{27}\text{O}_4$   $[\text{M}+1]^+$  403.1909, found 403.19011.

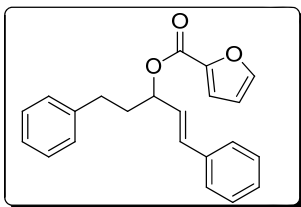

**(E)-1,5-Diphenylpent-1-en-3-yl-furan-2-carboxylate.**  $^1\text{H}$  NMR (400 MHz,  $\text{CDCl}_3$ )  $\delta$  7.58-7.57 (m, 1H), 7.38-7.12 (m, 10H), 7.10 (d,  $J = 4$  Hz, 1H), 6.69 (d,  $J = 16$  Hz, 1H), 6.51-6.49 (m, 1H), 6.24 (dd,  $J = 16, 7$  Hz, 1H), 5.68-5.63 (m, 1H), 2.77-2.72 (m, 1H), 2.25-2.20 (m, 2H), 2.13-2.11 (m, 1H), 2.09-2.04 (m, 1H);  $^{13}\text{C}$  NMR (100 MHz,  $\text{CDCl}_3$ )  $\delta$  158.2, 146.5, 144.9, 141.2, 136.3, 133.6, 128.7, 128.6, 128.5, 128.2, 127.1, 126.8, 126.2, 118.1, 112.0, 75.1, 36.3, 31.7. HRMS calcd for  $\text{C}_{22}\text{H}_{21}\text{O}_3$   $[\text{M}+1]^+$  333.1491, found 333.1492.

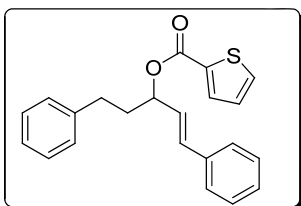

**(E)-1,5-Diphenylpent-1-en-3-yl-thiophene-2-carboxylate.**  $^1\text{H}$  NMR (400 MHz,  $\text{CDCl}_3$ )  $\delta$  7.81 (dd,  $J = 1.2, 4$  Hz, 1H), 7.56 (dd,  $J = 1.2, 4.6$  Hz, 1H), 7.36-7.18 (m, 10H), 7.11-7.09 (m, 1H), 6.70 (d,  $J = 16$  Hz, 1H), 6.24 (dd,  $J = 16, 7$  Hz, 1H), 5.63-5.561 (m, 1H), 2.80-2.75 (m, 2H), 2.25-2.20 (m, 1H), 2.13-2.06 (m, 1H);  $^{13}\text{C}$  NMR (100 MHz,  $\text{CDCl}_3$ )  $\delta$  161.8, 141.4, 136.4, 133.6, 133.6, 133.3, 132.6, 128.8, 128.7, 128.6, 128.2, 128.0, 127.3, 126.9, 126.2, 75.3, 36.5, 31.7. HRMS calcd for  $\text{C}_{22}\text{H}_{21}\text{O}_2\text{S}$   $[\text{M}+1]^+$  349.1262, found 349.1262.

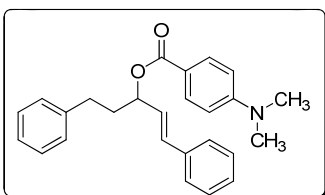

**(E)-1,5-Diphenylpent-1-en-3-yl-4-(dimethylamino)benzoate.**  $^1\text{H}$  NMR (400 MHz,  $\text{CDCl}_3$ )  $\delta$  7.96 (d,  $J = 7$  Hz, 2H), 7.39-7.19 (m, 10H), 6.70 (d,  $J = 7$  Hz, 2H), 6.67 (d,  $J =$

16 Hz, 1H), 6.29 (dd,  $J = 12, 7$  Hz, 1H), 5.69-5.67 (m, 1H), 3.06 (s, 6H), 2.90-2.76 (m, 2H), 2.55-2.20 (m, 1H), 2.14-2.11 (m, 1H);  $^{13}\text{C}$  NMR (100 MHz,  $\text{CDCl}_3$ )  $\delta$  184.2, 141.3, 139.4, 132.3, 131.5, 128.7, 128.6, 128.4, 127.9, 126.8, 126.1, 110.9, 73.8, 40.33, 36.72, 31.8. HRMS calcd for  $\text{C}_{26}\text{H}_{28}\text{NO}_2$   $[\text{M}+1]^+$  386.2120, found 386.2123.

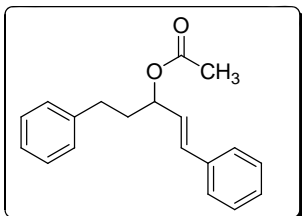

**(E)-1,5-Diphenylpent-1-en-3-yl acetate.**  $^1\text{H}$  NMR (400 MHz,  $\text{CDCl}_3$ )  $\delta$  7.31-7.18 (m, 10H), 6.61 (d,  $J = 16$  Hz, 1H), 6.14 (dd,  $J = 16, 8$  Hz, 1H), 5.43-5.40 (m, 1H), 2.70-2.65 (m, 2H), 2.10-2.08 (m, 1H), 2.04 (s, 3H), 2.01-1.98 (m, 1H);  $^{13}\text{C}$  NMR (100 MHz,  $\text{CDCl}_3$ )  $\delta$  170.6, 141.5, 136.4, 133.0, 128.8, 128.7, 128.6, 128.2, 127.6, 126.5, 126.2, 74.5, 36.3, 31.7, 21.5. HRMS calcd for  $\text{C}_{19}\text{H}_{21}\text{O}_2$   $[\text{M}+1]^+$  281.1542, found 281.1547.

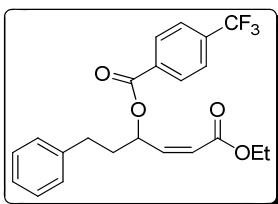

**(Z)-6-Ethoxy-6-oxo-1-phenylhex-4-en-3-yl-4-(trifluoromethyl)benzoate.**  $^1\text{H}$  NMR (400 MHz,  $\text{CDCl}_3$ )  $\delta$  8.09 (d,  $J = 8$  Hz, 2H), 7.69 (d,  $J = 8$  Hz, 2H), 7.26-7.16 (m, 5H), 6.54-6.52 (m, 1H), 6.19 (dd,  $J = 12, 8$  Hz, 1H), 5.90 (d,  $J = 12$  Hz, 1H), 4.20 (q,  $J = 7.2$  Hz, 2H), 2.83-2.79 (m, 2H), 2.22-2.16 (m, 2H), 1.30-1.24 (m, 4H);  $^{13}\text{C}$  NMR (100 MHz,  $\text{CDCl}_3$ )  $\delta$  165.5, 164.9, 146.5, 141.2, 130.2, 128.6, 128.5, 128.2, 125.6, 125.5, 125.4, 125.2, 121.4, 73.1, 60.7, 35.7, 31.9, 14.4. HRMS calcd for  $\text{C}_{22}\text{H}_{22}\text{O}_4\text{F}_3$   $[\text{M}+1]^+$  407.1470, found 407.1468.

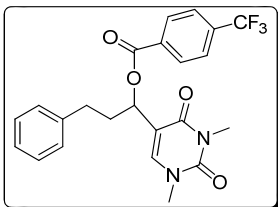

**1-(1,3-Dimethyl-2,4-dioxo-1,2,3,4-tetrahydropyrimidin-5-yl)-3-phenylpropyl-4-(trifluoromethyl)benzoate.**  $^1\text{H}$  NMR (400 MHz,  $\text{CDCl}_3$ )  $\delta$  8.19 (d,  $J = 8$  Hz, 2H), 7.73 (d,  $J = 8$  Hz, 2H), 7.41-7.22 (m, 5H), 6.19-6.04 (m, 1H), 3.41 (s, 6H) 2.62-2.53 (m, 2H), 2.42-2.44 (m, 1H), 2.28-2.25 (m, 1H);  $^{13}\text{C}$  NMR (100 MHz,  $\text{CDCl}_3$ )  $\delta$  184.3, 165.7, 147.5, 141.7, 129.9, 128.6, 128.5, 126.2, 126.1, 125.6, 125.5, 118.3, 72.8, 36.2, 34.5, 29.2, 27.6. HRMS calcd for  $\text{C}_{23}\text{H}_{22}\text{F}_3\text{O}_4$   $[\text{M}+1]^+$  447.1532, found 447.1534.

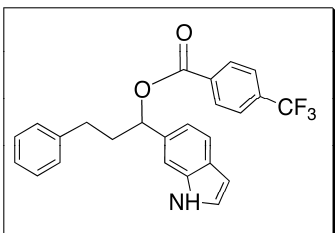

**1-(1H-Indol-6-yl)-3-phenylpropyl-4-(trifluoromethyl)benzoate.**  $^1\text{H}$  NMR (400 MHz,  $\text{CDCl}_3$ )  $\delta$  8.12 (d,  $J = 8$  Hz, 2H), 7.98 (s, 1H), 7.70 (d,  $J = 8$ , 2H), 7.45 (d,  $J = 8$ , 1H), 7.27-7.15 (m, 7H), 6.54-6.48 (m, 1H), 2.61-2.52 (m, 2H), 2.45-2.43 (m, 1H), 2.27-2.22 (m, 1H);  $^{13}\text{C}$  NMR (100 MHz,  $\text{CDCl}_3$ )  $\delta$  165.7, 141.6, 130.5, 129.9, 129.7, 128.7, 128.6, 126.1, 125.6, 125.5, 125.1, 113.1, 102.2, 72.8, 29.2, 27.6. HRMS calcd for  $\text{C}_{25}\text{H}_{21}\text{F}_3\text{NO}_2$   $[\text{M}+1]^+$  424.1524, found 424.1525.

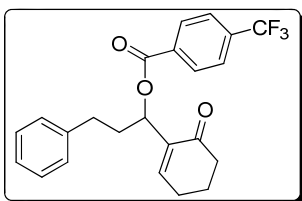

**1-(6-Oxocyclohex-1-enyl)-3-phenylpropyl-4-(trifluoromethyl)benzoate.**  $^1\text{H}$  NMR (400 MHz,  $\text{CDCl}_3$ )  $\delta$  8.09 (d,  $J = 8$  Hz, 2H), 7.76 (d,  $J = 8$  Hz, 2H), 7.27-7.18 (m, 5H), 7.1 (t,  $J = 4$  Hz, 1H), 6.21-6.05 (m, 1H), 3.10-3.08 (m, 2H), 2.96 (t,  $J = 7$  Hz, 2H), 2.61-2.60 (m, 2H), 2.21-2.26 (m, 2H), 2.12-2.08 (m, 1H), 1.98-1.96 (m, 1H);  $^{13}\text{C}$  NMR (100 MHz,

CDCl<sub>3</sub>)  $\delta$  192.4, 159.6, 141.2, 129.8, 128.6, 128.5, 126.1, 125.5, 104.1, 72.7, 37.4, 30.1, 29.1, 27.5, 23.0. HRMS calcd for C<sub>23</sub>H<sub>22</sub>F<sub>3</sub>O<sub>3</sub> [M+1]<sup>+</sup> 403.1521, found 403.1519.

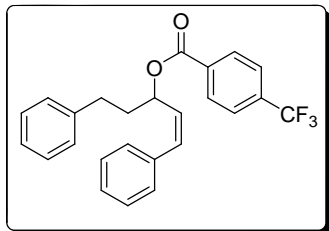

**(Z)-1,5-Diphenylpent-1-en-3-yl 4-(trifluoromethyl)benzoate.** <sup>1</sup>H NMR (400 MHz, CDCl<sub>3</sub>)  $\delta$  8.14 (d, *J* = 8 Hz, 2H), 7.69 (d, *J* = 8 Hz, 2H), 7.35-7.20 (m, 10H), 6.70 (d, *J* = 12 Hz, 1H), 5.95 (dd, *J* = 13, 6 Hz, 1H), 5.35-5.38 (m, 1H), 2.76-2.71 (m, 2H), 2.31-2.52 (m, 1H), 2.20-2.13 (m, 1H); <sup>13</sup>C NMR (100 MHz, CDCl<sub>3</sub>)  $\delta$  164.9, 141.3, 136.4, 133.8, 133.1, 130.1, 128.7, 128.6, 128.4, 128.2, 127.1, 126.7, 126.2, 125.5, 125.4, 125.2, 76.1, 35.8, 32.1. HRMS calcd for C<sub>25</sub>H<sub>22</sub>F<sub>3</sub>O<sub>2</sub> [M+1]<sup>+</sup> 411.1572, found 411.1575.

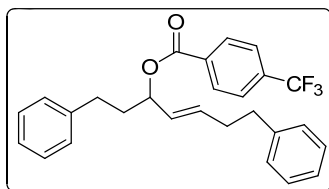

**(E)-1,7-Diphenylhept-4-en-3-yl 4-(trifluoromethyl)benzoate.** <sup>1</sup>H NMR (400 MHz, CDCl<sub>3</sub>)  $\delta$  8.13 (d, *J* = 8 Hz, 2H), 7.68 (d, *J* = 8 Hz, 2H), 7.34-7.21 (m, 10H), 6.19-6.20 (m, 2H), 5.80-5.87 (m, 1H), 2.61-2.78 (m, 4H), 2.35-2.39 (m, 1H), 1.94-2.09 (m, 3H); <sup>13</sup>C NMR (100 MHz, CDCl<sub>3</sub>)  $\delta$  162.2, 141.7, 141.5, 134.5, 133.5, 133.4, 132.5, 132.4, 128.8, 128.7, 128.6, 128.5, 128.4, 128.3, 127.9, 127.8, 126.3, 126.2, 125.1, 125.4, 75.3, 36.4, 35.5, 34.2, 32.3. HRMS calcd for C<sub>27</sub>H<sub>26</sub>F<sub>3</sub>O<sub>2</sub> [M+1]<sup>+</sup> 439.1885 found 439.1884.

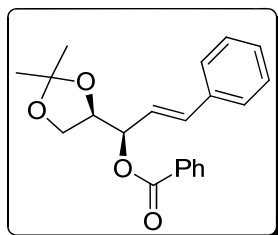



**(RE)-1-((R)-2,2-dimethyl-1,3-dioxolan-4-yl)-3-phenylallyl benzoate.**  $^1\text{H}$  NMR (400 MHz,  $\text{CDCl}_3$ )  $\delta$  8.10 (d,  $J = 6$  Hz, 2H), 7.58-7.26 (m, 8H), 6.67 (d,  $J = 16$  Hz, 1H), 6.32 (dd,  $J = 16, 9$  Hz, 1H), 4.45-4.42 (m, 1H), 4.15-4.10 (m, 2H), 4.05-4.004 (m, 1H), 3.95-3.93 (m, 1H), 1.25 (s, 3H), 1.24 (s, 3H);  $^{13}\text{C}$  NMR (100 MHz,  $\text{CDCl}_3$ )  $\delta$  164.3, 136.9, 133.4, 129.5, 128.8, 128.7, 128.4, 127.8, 126.7, 125.5, 110.1, 78.5, 67.9, 26.8, 26.5. HRMS calcd for  $\text{C}_{21}\text{H}_{23}\text{O}_4$   $[\text{M}+1]^+$  339.1596, found 339.1599.

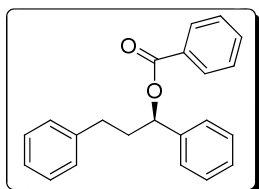

**(R)-1,3-Diphenylpropyl benzoate.** (97% ee)  $^1\text{H}$  NMR (400 MHz,  $\text{CDCl}_3$ )  $\delta$  8.08 (d,  $J = 8$  Hz, 2H), 7.54-7.16 (m, 13H), 7.03-6.99 (m, 1H), 2.76-2.69 (m, 2H), 2.45-2.40 (m, 1H), 2.26-2.21 (m, 1H);  $^{13}\text{C}$  NMR (100 MHz,  $\text{CDCl}_3$ )  $\delta$  165.9, 141.3, 140.7, 133.1, 130.5, 129.8, 128.7, 128.6, 128.5, 128.3, 128.1, 126.6, 126.1, 76.2, 38.2, 32.0. HRMS calcd for  $\text{C}_{22}\text{H}_{21}\text{O}_2$   $[\text{M}+1]^+$  317.1542, found 317.1543.

### HPLC Chromatograms

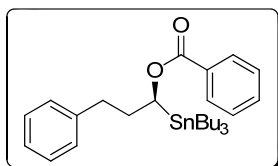

Chromatography conditions: Chiralpak ADH (4.6  $\times$  250 mm), hexanes, 0.5 mL/min, 254 nm

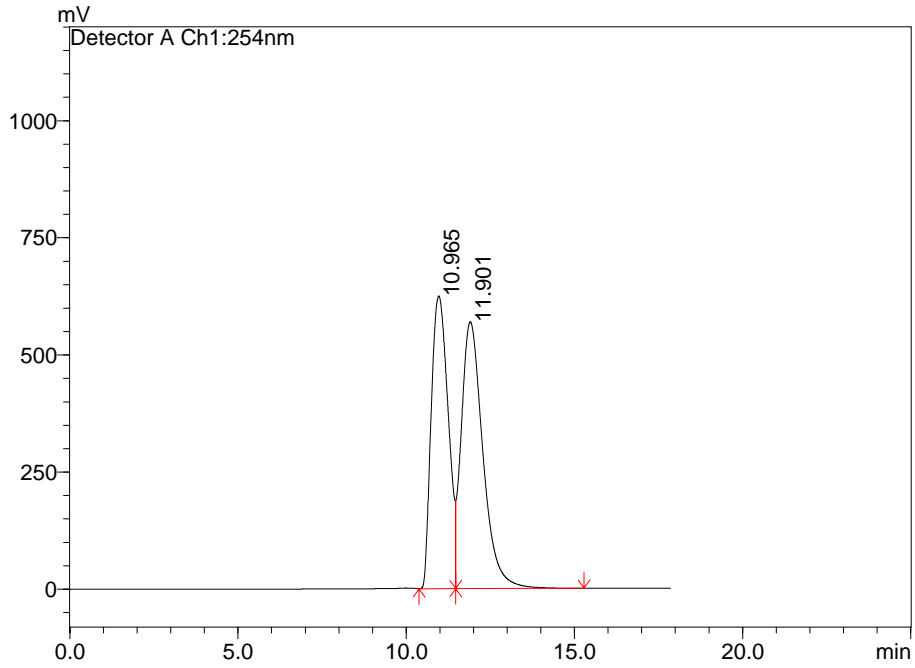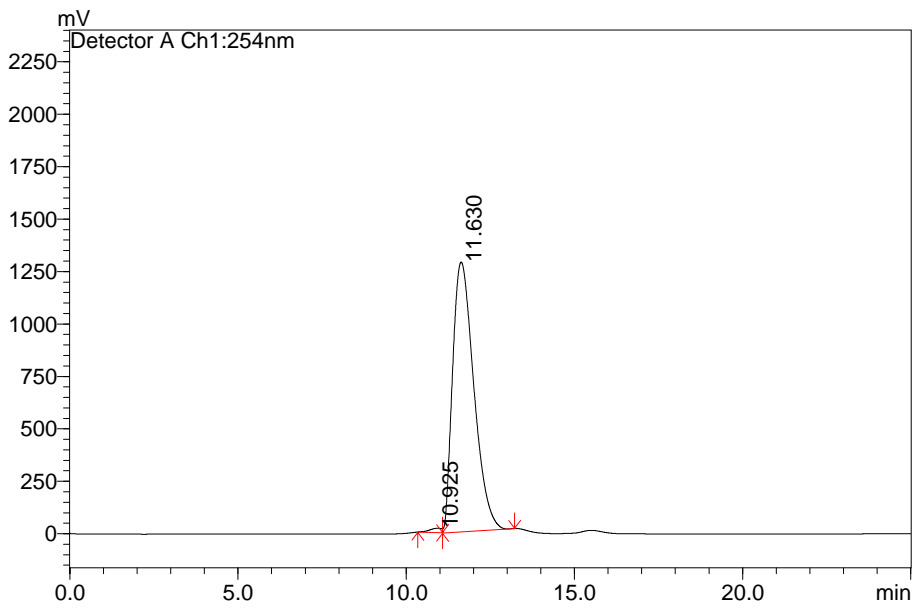

| Peak# | Retention time (min) | Area% |
|-------|----------------------|-------|
| 1     | 10.92                | 0.89  |
| 2     | 11.63                | 99.10 |

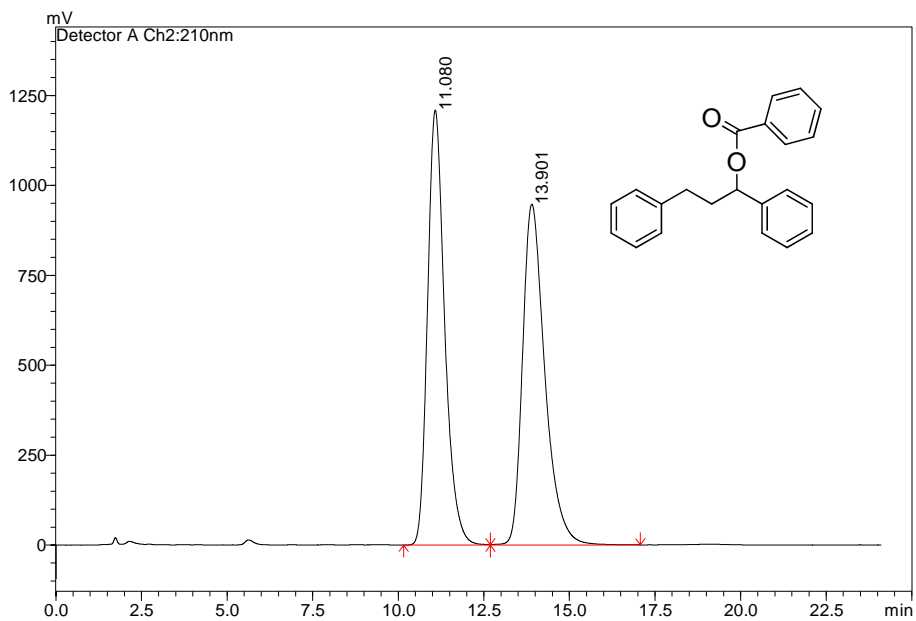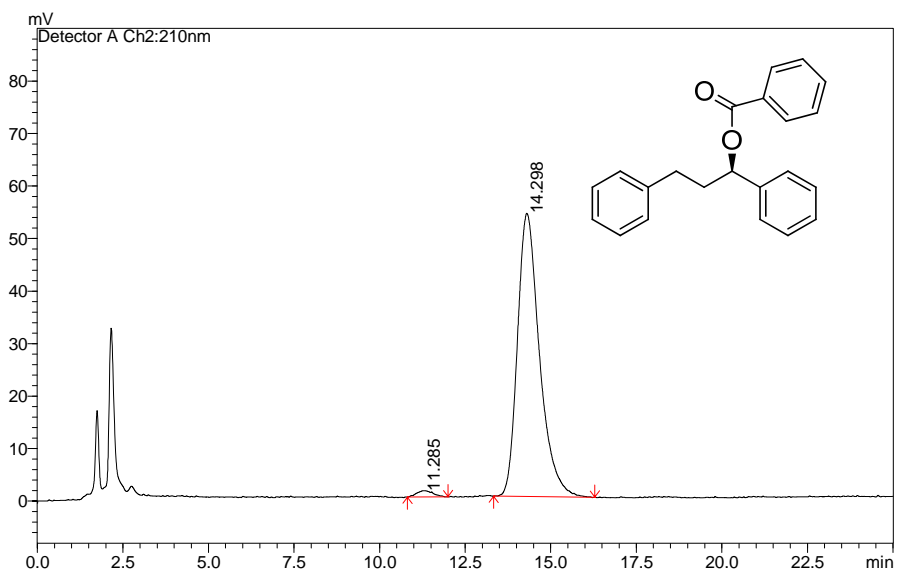

| Peak# | Retention time (min) | Area% |
|-------|----------------------|-------|
| 1     | 11.28                | 1.58  |
| 2     | 14.29                | 98.41 |
|       |                      |       |

Chromatography conditions: Chiralcel OD (4.6 × 250 mm), hexane/IPA (100:2), 1 mL/min, 210 nm.

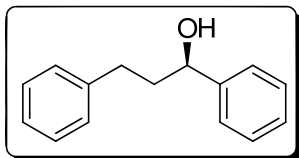

**(R)-1,3-Diphenylpropan-1-ol.**<sup>8,9</sup> (98% ee) <sup>1</sup>H NMR (400 MHz, CDCl<sub>3</sub>) δ 7.35-7.18 (m, 10H), 4.70-4.67 (m, 1H), 2.76-2.65 (m, 2H), 2.15-2.10 (m, 1H), 2.07-2.01 (m, 1H); <sup>13</sup>C NMR (100 MHz, CDCl<sub>3</sub>) δ 144.7, 141.9, 128.7, 128.6, 128.5, 127.8, 126.1, 126.0, 74.0, 40.6, 32.2.

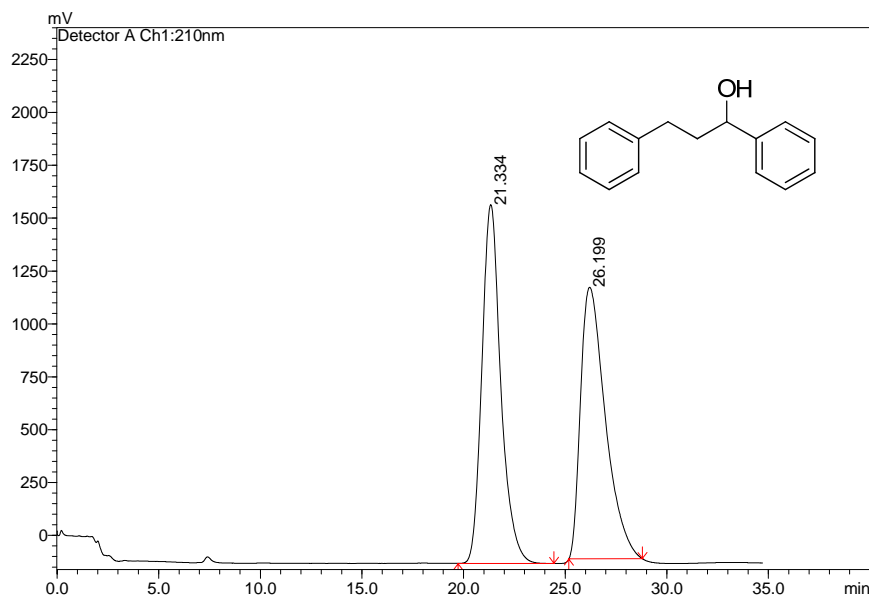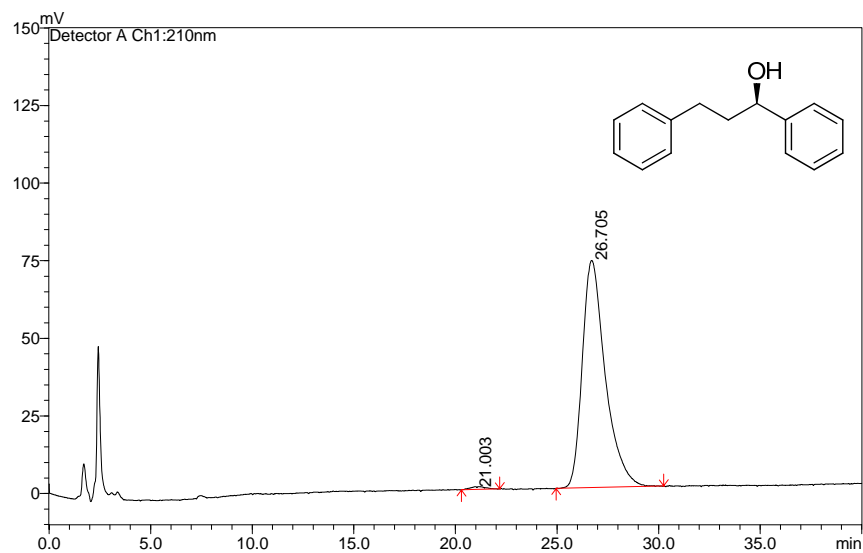

| Peak# | Retention time (min) | Area% |
|-------|----------------------|-------|
| 1     | 21.003               | 0.78  |

|   |        |       |
|---|--------|-------|
| 2 | 26.705 | 99.28 |
|---|--------|-------|

Chromatography Conditions: Chiralcel OD (4.6 x 250 mm), hexane/IPA (95:5), 1 mL/min, 210 nm.

### Literature References

- (1) (a) Bhatt, R. K.; Ye, J.; Falck, J. R. *Tetrahedron Lett.* **1994**, 35 4081–4084. (b) Mohapatra, S.; Bandyopadhyay, A.; Barma, D. K.; Capdevila, J. H.; Falck, J. R. *Org. Lett.* **2003**, 5, 4759–4762.
- (2) Paterson, I.; Paquet, T. *Org. Lett.* **2010**, 12, 2158–2161.
- (3) Smith, A. B., III; Kuerti, L.; Davulcu, A. H.; Cho, Y. S.; Ohmoto, K. *J. Org. Chem.* **2007**, 72, 4611–4620.
- (4) Takami, K.; Yorimitsu, H.; Oshima, K. *Org. Lett.* **2002**, 4, 2993–2995.
- (5) Hermanson, J. R.; Hershberger, J. W.; Pinhas, A. R. *Organometallics* **1995**, 14, 5426–5437.
- (6) Takai, K.; Ichiguchi, T.; Hikasa, S. *Synlett* **1999**, 1268–1270.
- (7) Ohta, T.; Yamato, Y.; Tahira, H.; Somei, M. *Heterocycles* **1987**, 26, 2817–2822.
- (8) Node, M.; Nishide, K.; Shigeta, Y.; Shiraki, H.; Obata, K. *J. Am. Chem. Soc.* **2000**, 122, 1927–1936.
- (9) Anthony, R.; Stoner, H. E. J.; Peterson, M. J.; Grover, V. K. *J. Org. Chem.* **2003**, 68, 8092–8096.
